# Supplementary material for: Modeling fuel-, vehicle type-, and age-specific CO 2 emissions from global on-road vehicles, 1970–2020
Source: Copernicus journal article supplement (doi:10.5194/essd-2024-101), 2024-04-25
Supplement: Supplementary file 1 [file essd-2024-101-supplement.zip]

*Supplement of*

**Modeling fuel, vehicle- type, and age specific CO<sub>2</sub> emissions from  
global on-road vehicles during 1970-2020**

Liu Yan<sup>1</sup>, Qiang Zhang<sup>2</sup>, Kebin He<sup>1</sup>, Bo Zheng<sup>3</sup>

<sup>1</sup> State Key Joint Laboratory of Environment Simulation and Pollution Control, School of Environment, Tsinghua University, Beijing, People's Republic of China

<sup>2</sup> Ministry of Education Key Laboratory for Earth System Modeling, Department of Earth System Science, Tsinghua University, Beijing, People's Republic of China

<sup>3</sup> Institute of Environment and Ecology, Tsinghua Shenzhen International Graduate School, Tsinghua University, Shenzhen, China

**Fig S1. Region definition**

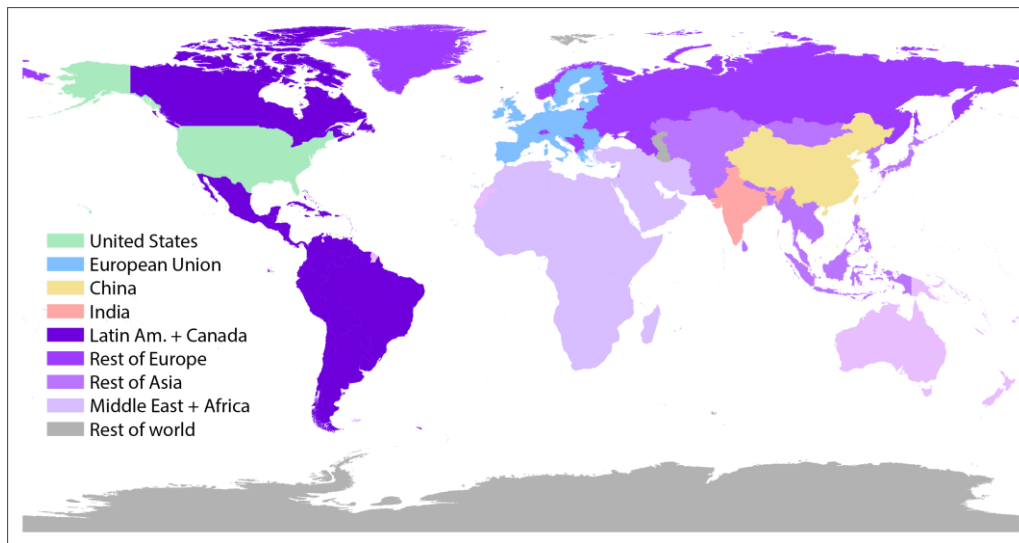

**Fig S2. Comparison of WRS, OICA, and local statistics**

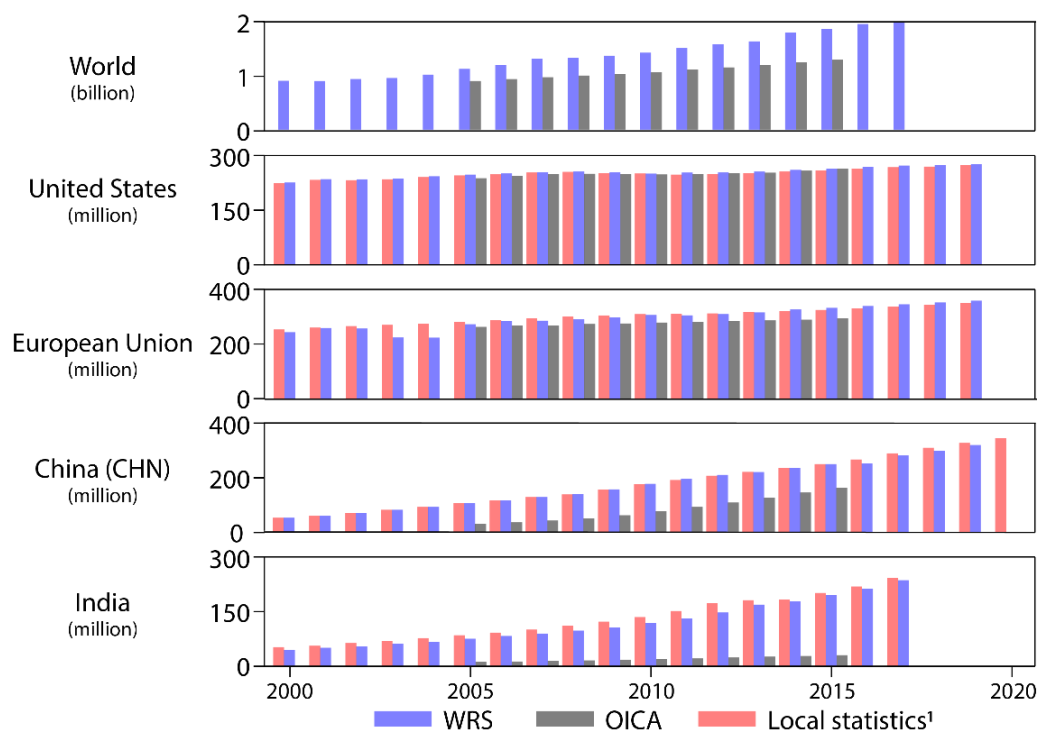

<sup>1</sup> United States: Transportation Energy Data Book, European Union: ACEA/European Commission, China (CHN): NBS, India: Statistical Year Book India.

**Fig S3. Verification of the modeled vehicle stock in rest countries in 2015.**

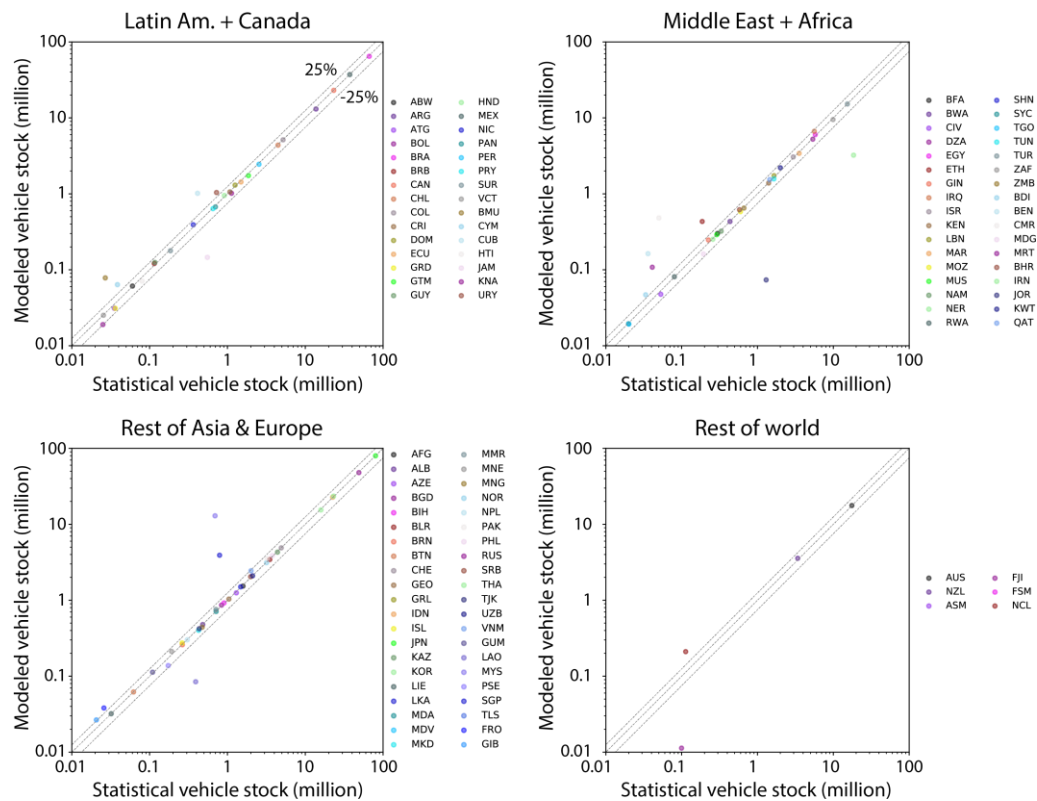

**Fig S4. Verification of the age distribution for CLDV, buses, and trucks in 2015.**

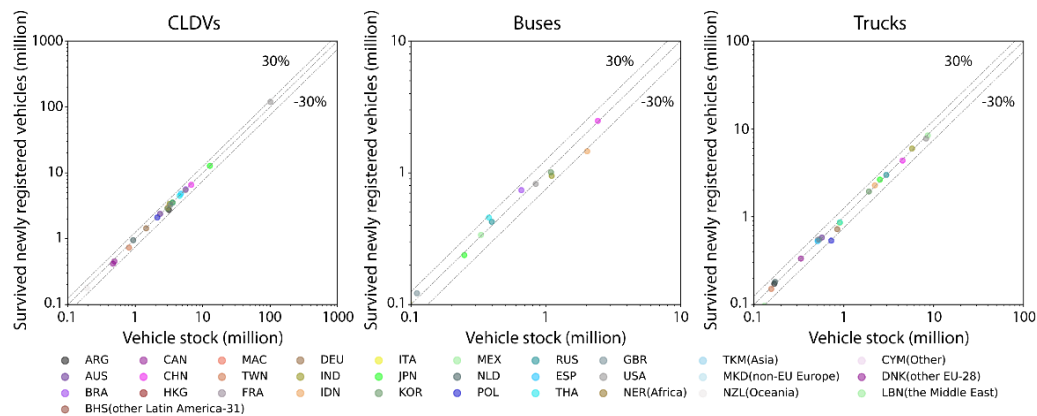

**Fig S5. Comparison of modeled and statistical fuel consumption of global on-road vehicles.**

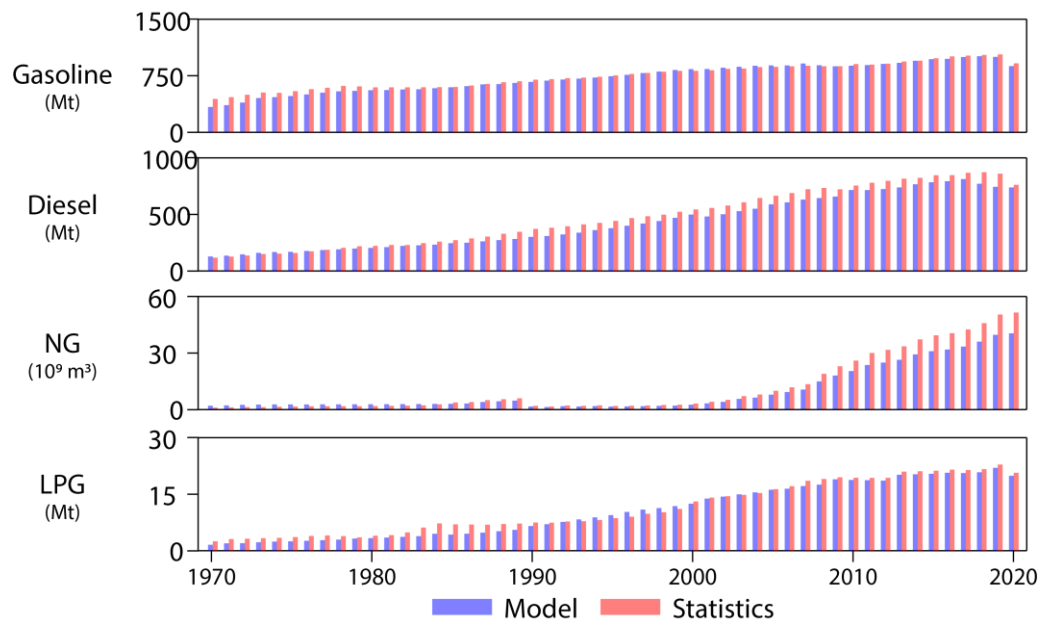

**Fig S6. Spatial distribution of vehicle stock (a) and regional contribution to global vehicle ownership (b) during 1970-2020.**

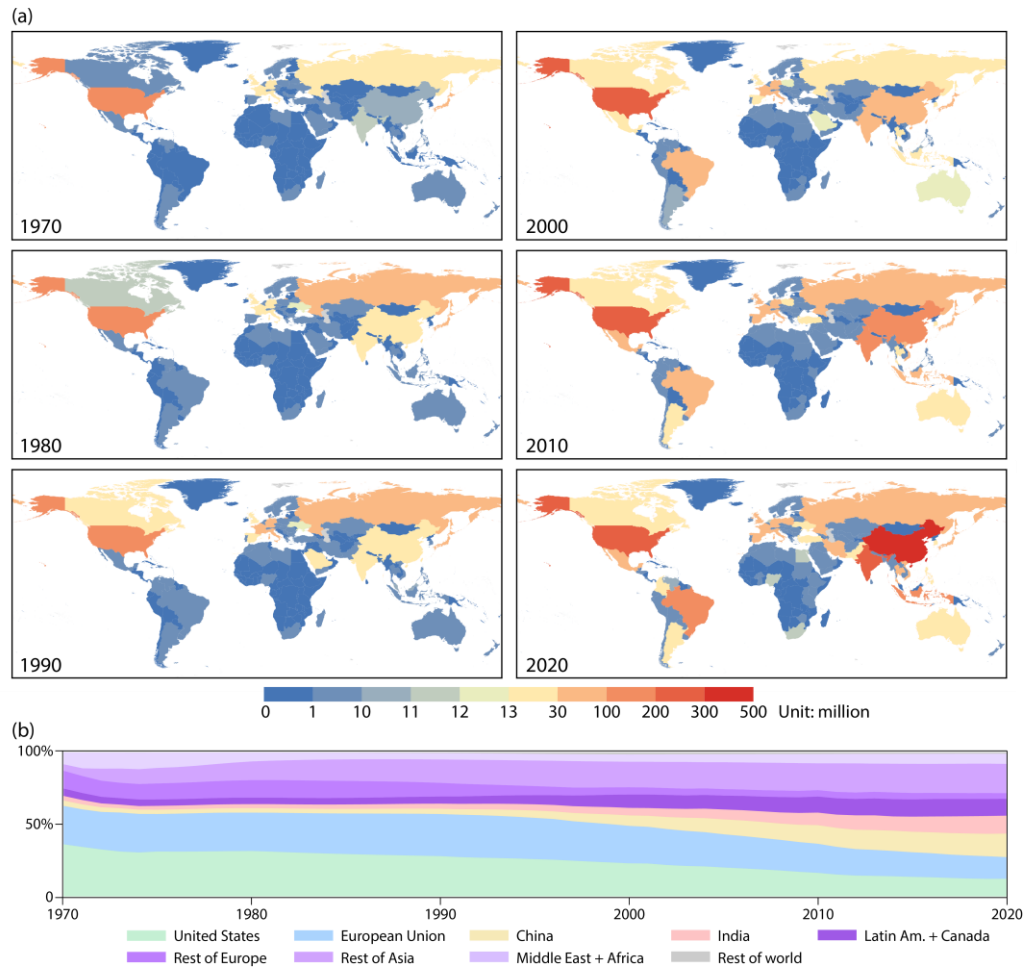

**Fig S7. Vehicle ownership by category and fuel type in rest regions**

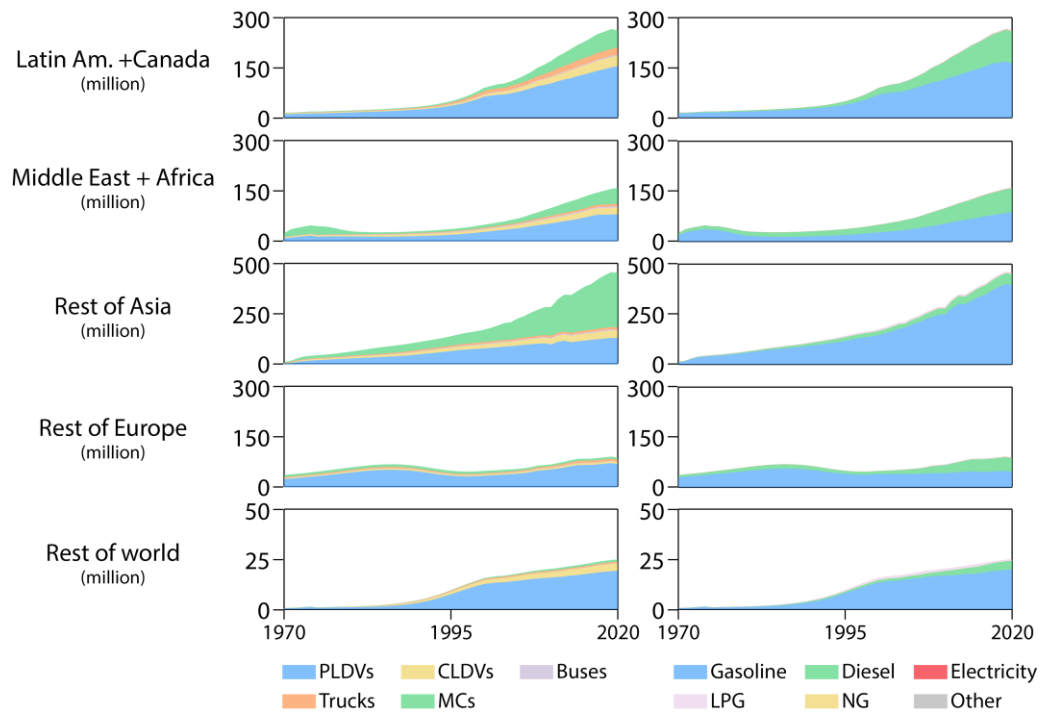

**Fig S8. Trends in on-road CO<sub>2</sub> emissions from 1970 to 2020.**

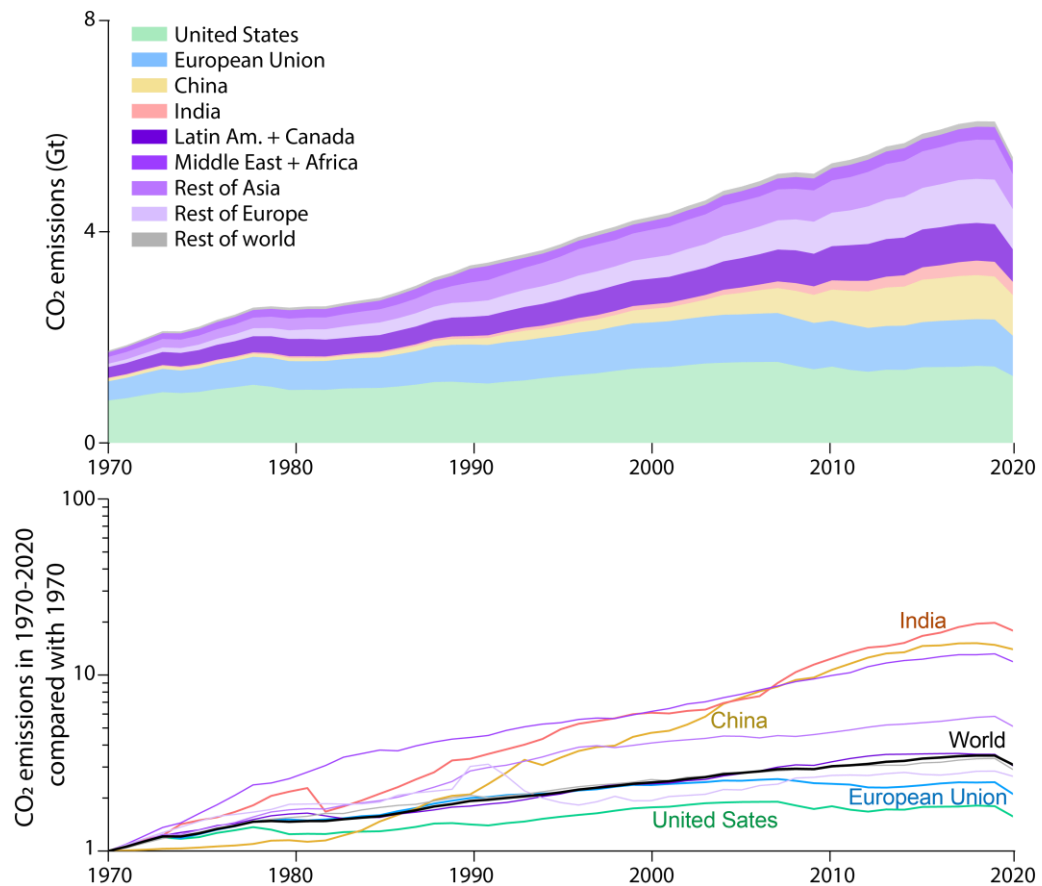

**Fig S9. Category distribution of CO<sub>2</sub> emissions.**

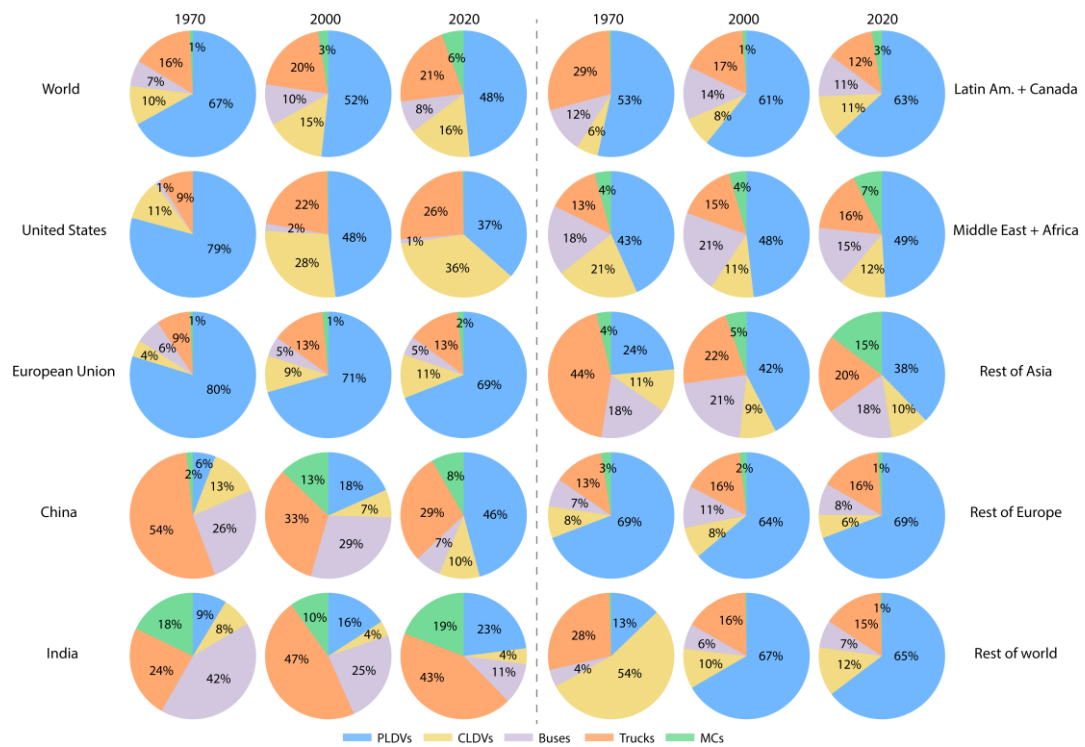

**Fig S10. Fuel Structure of vehicle ownership**

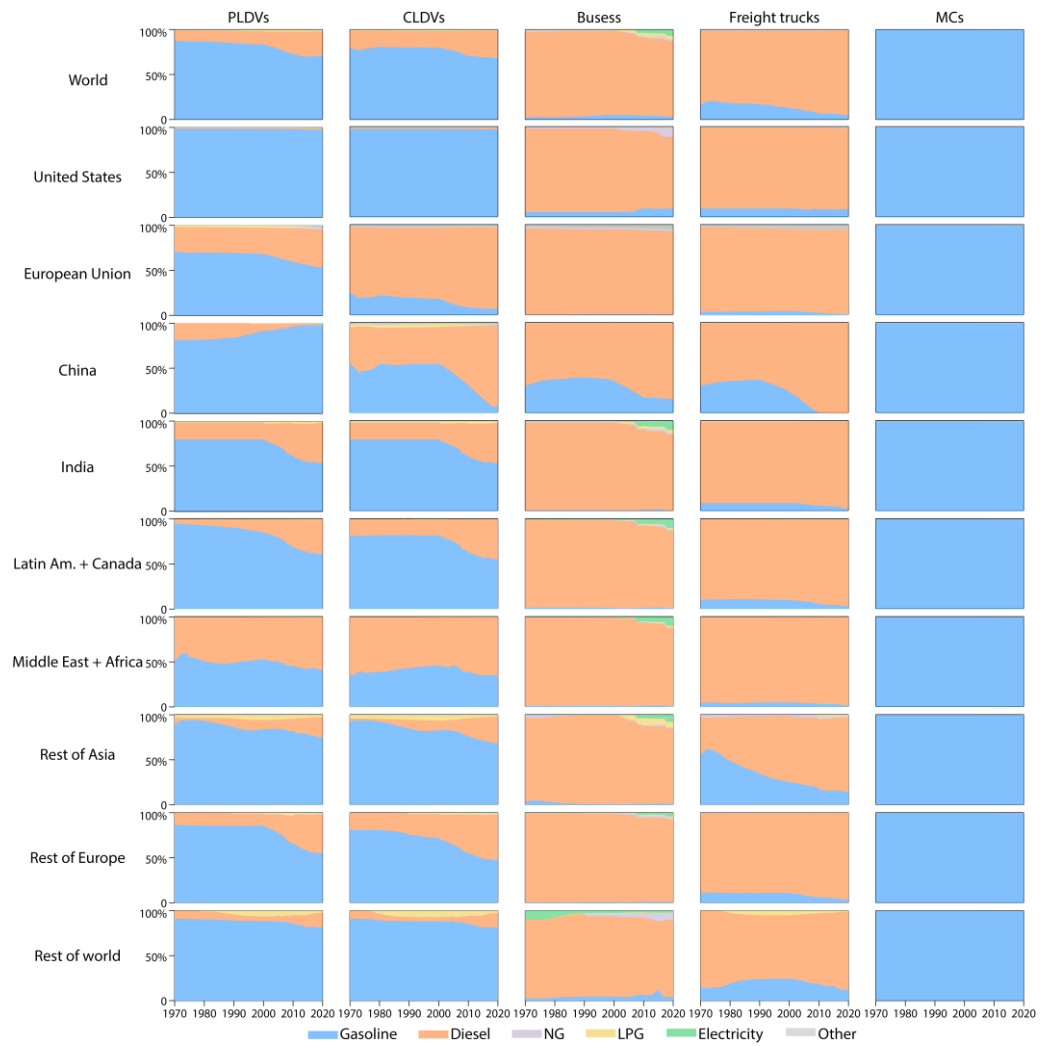



**Fig S11. Transition of diesel vehicles' contribution to CO<sub>2</sub> emissions in rest regions.**

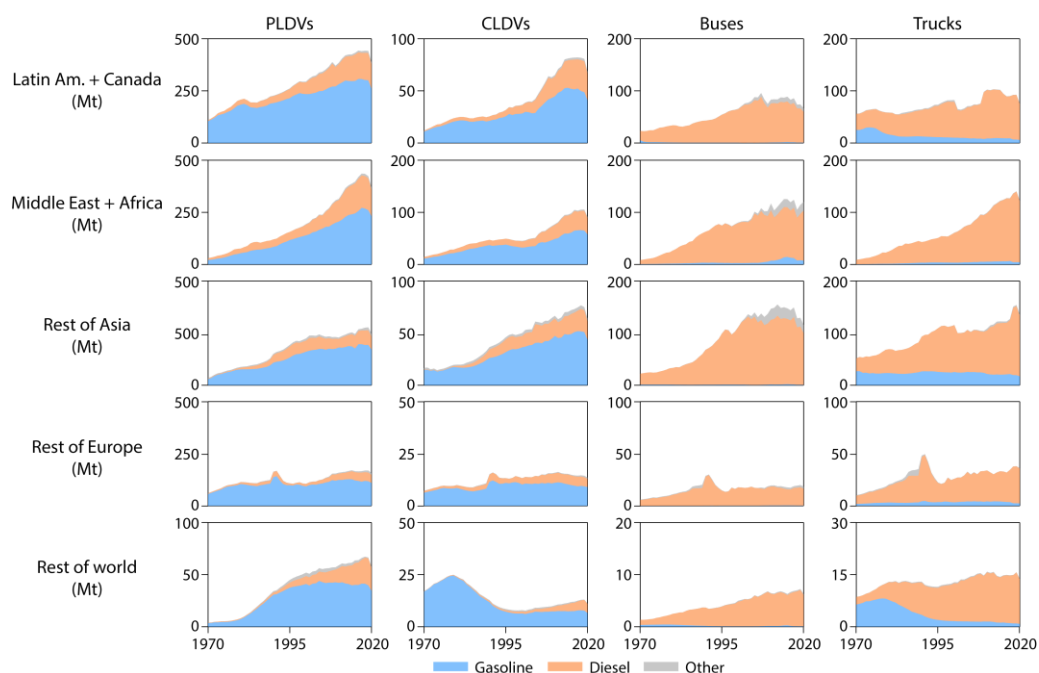

**Fig S12. Comparison of on-road CO<sub>2</sub> emissions between this study and other inventories**

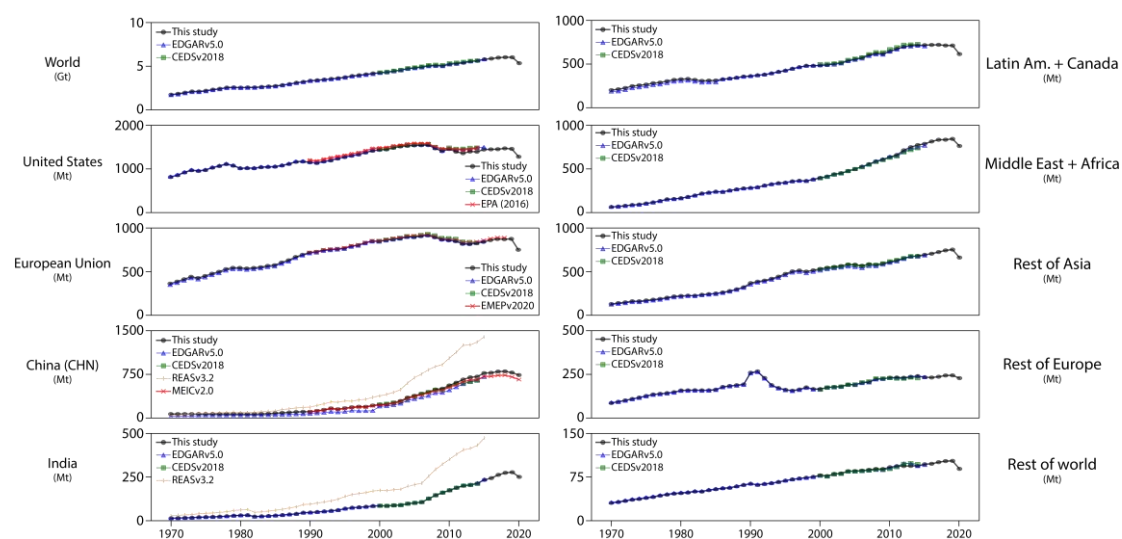

**Table S1. Country list**

| Country                  | Emission estimation group |                | Uncertainty group     |
|--------------------------|---------------------------|----------------|-----------------------|
|                          | Name                      | Note           |                       |
| Afghanistan              | Asia                      | B <sup>1</sup> | Non-Annex I countries |
| Albania                  | non-EU Europe             | B              | Non-Annex I countries |
| Algeria                  | Africa                    | B              | Non-Annex I countries |
| American Samoa           | Oceania                   | B              | Non-Annex I countries |
| Angola                   | Africa                    | B              | Non-Annex I countries |
| Antigua and Barbuda      | other Latin America-31    | B              | Non-Annex I countries |
| Argentina                | Argentina                 | F <sup>2</sup> | Non-Annex I countries |
| Armenia                  | non-EU Europe             | B              | Non-Annex I countries |
| Aruba                    | Other                     | B              | Non-Annex I countries |
| Australia                | Australia                 | F              | Australia             |
| Austria                  | other EU-28               | B              | EU15                  |
| Azerbaijan               | non-EU Europe             | B              | Non-Annex I countries |
| Bahamas                  | other Latin America-31    | B              | Non-Annex I countries |
| Bahrain                  | the Middle East           | B              | Non-Annex I countries |
| Bangladesh               | Asia                      | B              | Non-Annex I countries |
| Barbados                 | other Latin America-31    | B              | Non-Annex I countries |
| Belarus                  | non-EU Europe             | B              | EIT90                 |
| Belgium                  | other EU-28               | B              | EU15                  |
| Belize                   | other Latin America-31    | B              | Non-Annex I countries |
| Benin                    | Africa                    | B              | Non-Annex I countries |
| Bermuda                  | Other                     | B              | Non-Annex I countries |
| Bhutan                   | Asia                      | B              | Non-Annex I countries |
| Bolivia                  | other Latin America-31    | B              | Non-Annex I countries |
| Bosnia and Herzegovina   | non-EU Europe             | B              | Non-Annex I countries |
| Botswana                 | Africa                    | B              | Non-Annex I countries |
| Brazil                   | Brazil                    | F              | Non-Annex I countries |
| British Virgin Islands   | Other                     | B              | Non-Annex I countries |
| Brunei Darussalam        | Asia                      | B              | Non-Annex I countries |
| Bulgaria                 | other EU-28               | B              | EIT90                 |
| Burkina Faso             | Africa                    | B              | Non-Annex I countries |
| Burundi                  | Africa                    | B              | Non-Annex I countries |
| Cape Verde               | Africa                    | B              | Non-Annex I countries |
| Cambodia                 | Asia                      | B              | Non-Annex I countries |
| Cameroon                 | Africa                    | B              | Non-Annex I countries |
| Canada                   | Canada                    | F              | Canada                |
| Cayman Islands           | Other                     | B              | Non-Annex I countries |
| Central African Republic | Africa                    | B              | Non-Annex I countries |
| Chad                     | Africa                    | B              | Non-Annex I countries |

| Country                      | Emission estimation group |      | Uncertainty group     |
|------------------------------|---------------------------|------|-----------------------|
|                              | Name                      | Note |                       |
| Chile                        | other Latin America-31    | B    | Non-Annex I countries |
| China                        | China                     | F    | China                 |
| Hong Kong, China             | China                     | F    | China                 |
| Macao                        | China                     | F    | China                 |
| Chinese Taipei               | China                     | F    | China                 |
| Colombia                     | other Latin America-31    | B    | Non-Annex I countries |
| Comoros                      | Africa                    | B    | Non-Annex I countries |
| Democratic Republic of Congo | Africa                    | B    | Non-Annex I countries |
| Congo                        | Africa                    | B    | Non-Annex I countries |
| Costa Rica                   | other Latin America-31    | B    | Non-Annex I countries |
| Cote d'Ivoire                | Africa                    | B    | Non-Annex I countries |
| Croatia                      | other EU-28               | B    | EIT90                 |
| Cuba                         | other Latin America-31    | B    | Non-Annex I countries |
| Curacao                      | Other                     | B    | Non-Annex I countries |
| Cyprus                       | other EU-28               | B    | EIT90                 |
| Czech Republic               | other EU-28               | B    | EIT90                 |
| Denmark                      | other EU-28               | B    | EU15                  |
| Djibouti                     | Africa                    | B    | Non-Annex I countries |
| Dominica                     | other Latin America-31    | B    | Non-Annex I countries |
| Dominican Republic           | other Latin America-31    | B    | Non-Annex I countries |
| Ecuador                      | other Latin America-31    | B    | Non-Annex I countries |
| Egypt                        | the Middle East           | B    | Non-Annex I countries |
| El Salvador                  | other Latin America-31    | B    | Non-Annex I countries |
| Equatorial Guinea            | Africa                    | B    | Non-Annex I countries |
| Eritrea                      | Africa                    | B    | Non-Annex I countries |
| Estonia                      | other EU-28               | B    | EIT90                 |
| Swaziland                    | Africa                    | B    | Non-Annex I countries |
| Ethiopia                     | Africa                    | B    | Non-Annex I countries |
| Faeroe Islands               | non-EU Europe             | B    | Non-Annex I countries |
| Fiji                         | Oceania                   | B    | Non-Annex I countries |
| Finland                      | other EU-28               | B    | EU15                  |
| France                       | France                    | F    | EU15                  |
| Gabon                        | Africa                    | B    | Non-Annex I countries |
| Gambia                       | Africa                    | B    | Non-Annex I countries |
| Georgia                      | non-EU Europe             | B    | Non-Annex I countries |
| Germany                      | Germany                   | F    | EU15                  |
| Ghana                        | Africa                    | B    | Non-Annex I countries |
| Gibraltar                    | non-EU Europe             | B    | Non-Annex I countries |
| Greece                       | other EU-28               | B    | EU15                  |
| Greenland                    | non-EU Europe             | B    | Non-Annex I countries |
| Grenada                      | other Latin America-31    | B    | Non-Annex I countries |

| Country                              | Emission estimation group |      | Uncertainty group     |
|--------------------------------------|---------------------------|------|-----------------------|
|                                      | Name                      | Note |                       |
| Guam                                 | Asia                      | B    | Non-Annex I countries |
| Guatemala                            | other Latin America-31    | B    | Non-Annex I countries |
| Guinea                               | Africa                    | B    | Non-Annex I countries |
| Guinea-Bissau                        | Africa                    | B    | Non-Annex I countries |
| Guyana                               | other Latin America-31    | B    | Non-Annex I countries |
| Haiti                                | other Latin America-31    | B    | Non-Annex I countries |
| Honduras                             | other Latin America-31    | B    | Non-Annex I countries |
| Hungary                              | other EU-28               | B    | EIT90                 |
| Iceland                              | non-EU Europe             | B    | OECD90                |
| India                                | India                     | F    | India                 |
| Indonesia                            | Indonesia                 | F    | Non-Annex I countries |
| Islamic Republic of Iran             | the Middle East           | B    | Non-Annex I countries |
| Iraq                                 | the Middle East           | B    | Non-Annex I countries |
| Ireland                              | other EU-28               | B    | EU15                  |
| Israel                               | the Middle East           | B    | Non-Annex I countries |
| Italy                                | Italy                     | F    | EU15                  |
| Jamaica                              | other Latin America-31    | B    | Non-Annex I countries |
| Japan                                | Japan                     | F    | Japan                 |
| Jordan                               | the Middle East           | B    | Non-Annex I countries |
| Kazakhstan                           | Asia                      | B    | Non-Annex I countries |
| Kenya                                | Africa                    | B    | Non-Annex I countries |
| Kiribati                             | Asia                      | B    | Non-Annex I countries |
| Democratic Peoples Republic of Korea | Asia                      | B    | Non-Annex I countries |
| Republic of Korea                    | South Korea               | F    | Non-Annex I countries |
| Kuwait                               | the Middle East           | B    | Non-Annex I countries |
| Kyrgyzstan                           | Asia                      | B    | Non-Annex I countries |
| Laos                                 | Asia                      | B    | Non-Annex I countries |
| Latvia                               | other EU-28               | B    | EIT90                 |
| Lebanon                              | the Middle East           | B    | Non-Annex I countries |
| Lesotho                              | Africa                    | B    | Non-Annex I countries |
| Liberia                              | Africa                    | B    | Non-Annex I countries |
| Libya                                | Africa                    | B    | Non-Annex I countries |
| Liechtenstein                        | non-EU Europe             | B    | Non-Annex I countries |
| Lithuania                            | other EU-28               | B    | EIT90                 |
| Luxembourg                           | other EU-28               | B    | EU15                  |
| Madagascar                           | Africa                    | B    | Non-Annex I countries |
| Malawi                               | Africa                    | B    | Non-Annex I countries |
| Malaysia                             | Asia                      | B    | Non-Annex I countries |
| Maldives                             | Asia                      | B    | Non-Annex I countries |
| Mali                                 | Africa                    | B    | Non-Annex I countries |
| Malta                                | other EU-28               | B    | EIT90                 |

| Country                                           | Emission estimation group |      | Uncertainty group     |
|---------------------------------------------------|---------------------------|------|-----------------------|
|                                                   | Name                      | Note |                       |
| Marshall Islands                                  | Oceania                   | B    | Non-Annex I countries |
| Mauritania                                        | Africa                    | B    | Non-Annex I countries |
| Mauritius                                         | Africa                    | B    | Non-Annex I countries |
| Mexico                                            | Mexico                    | F    | Non-Annex I countries |
| Federated States of Micronesia                    | Oceania                   | B    | Non-Annex I countries |
| Moldova                                           | non-EU Europe             | B    | Non-Annex I countries |
| Mongolia                                          | Asia                      | B    | Non-Annex I countries |
| Montenegro                                        | non-EU Europe             | B    | Non-Annex I countries |
| Morocco                                           | Africa                    | B    | Non-Annex I countries |
| Mozambique                                        | Africa                    | B    | Non-Annex I countries |
| Myanmar (Burma)                                   | Asia                      | B    | Non-Annex I countries |
| Namibia                                           | Africa                    | B    | Non-Annex I countries |
| Nepal                                             | Asia                      | B    | Non-Annex I countries |
| Netherlands                                       | Netherlands               | F    | EU15                  |
| New Caledonia                                     | Oceania                   | B    | Non-Annex I countries |
| New Zealand                                       | Oceania                   | B    | OECD90                |
| Nicaragua                                         | other Latin America-31    | B    | Non-Annex I countries |
| Niger                                             | Africa                    | B    | Non-Annex I countries |
| Nigeria                                           | Africa                    | B    | Non-Annex I countries |
| Macedonia (former Yugoslav Republic of Macedonia) | non-EU Europe             | B    | Non-Annex I countries |
| Norway                                            | non-EU Europe             | B    | OECD90                |
| Palestine                                         | Asia                      | B    | Non-Annex I countries |
| Oman                                              | the Middle East           | B    | Non-Annex I countries |
| Pakistan                                          | Asia                      | B    | Non-Annex I countries |
| Panama                                            | other Latin America-31    | B    | Non-Annex I countries |
| Papua New Guinea                                  | Oceania                   | B    | Non-Annex I countries |
| Paraguay                                          | other Latin America-31    | B    | Non-Annex I countries |
| Peru                                              | other Latin America-31    | B    | Non-Annex I countries |
| Philippines                                       | Asia                      | B    | Non-Annex I countries |
| Poland                                            | Poland                    | F    | EIT90                 |
| Portugal                                          | other EU-28               | B    | EU15                  |
| Puerto Rico                                       | Other                     | B    | Non-Annex I countries |
| Qatar                                             | the Middle East           | B    | Non-Annex I countries |
| Romania                                           | other EU-28               | B    | EIT90                 |
| Russia                                            | Russia                    | F    | Russia                |
| Rwanda                                            | Africa                    | B    | Non-Annex I countries |
| Samoa                                             | Oceania                   | B    | Non-Annex I countries |
| Sao Tome and Principe                             | Africa                    | B    | Non-Annex I countries |
| Saudi Arabia                                      | the Middle East           | B    | Non-Annex I countries |
| Senegal                                           | Africa                    | B    | Non-Annex I countries |

| Country                      | Emission estimation group |      | Uncertainty group     |
|------------------------------|---------------------------|------|-----------------------|
|                              | Name                      | Note |                       |
| Serbia                       | non-EU Europe             | B    | Non-Annex I countries |
| Seychelles                   | Africa                    | B    | Non-Annex I countries |
| Sierra Leone                 | Africa                    | B    | Non-Annex I countries |
| Singapore                    | Asia                      | B    | Non-Annex I countries |
| Slovakia                     | other EU-28               | B    | EIT90                 |
| Slovenia                     | other EU-28               | B    | EIT90                 |
| Soloman Islands              | Oceania                   | B    | Non-Annex I countries |
| Somalia                      | Africa                    | B    | Non-Annex I countries |
| South Africa                 | Africa                    | B    | Non-Annex I countries |
| Spain                        | Spain                     | F    | EU15                  |
| Sri Lanka                    | Asia                      | B    | Non-Annex I countries |
| Saint Helena                 | Africa                    | B    | Non-Annex I countries |
| Saint Kitts and Nevis        | other Latin America-31    | B    | Non-Annex I countries |
| Saint Lucia                  | other Latin America-31    | B    | Non-Annex I countries |
| Saint Vincent And Grenadines | other Latin America-31    | B    | Non-Annex I countries |
| Sudan                        | Africa                    | B    | Non-Annex I countries |
| Suriname                     | other Latin America-31    | B    | Non-Annex I countries |
| Sweden                       | other EU-28               | B    | EU15                  |
| Switzerland                  | non-EU Europe             | B    | OECD90                |
| Syria                        | the Middle East           | B    | Non-Annex I countries |
| Tajikistan                   | Asia                      | B    | Non-Annex I countries |
| Tanzania                     | Africa                    | B    | Non-Annex I countries |
| Thailand                     | Thailand                  | F    | Non-Annex I countries |
| Timor-Leste                  | Asia                      | B    | Non-Annex I countries |
| Togo                         | Africa                    | B    | Non-Annex I countries |
| Tonga                        | Oceania                   | B    | Non-Annex I countries |
| Trinidad and Tobago          | other Latin America-31    | B    | Non-Annex I countries |
| Tunisia                      | Africa                    | B    | Non-Annex I countries |
| Turkey                       | the Middle East           | B    | OECD90                |
| Turkmenistan                 | Asia                      | B    | Non-Annex I countries |
| Tuvalu                       | Oceania                   | B    | Non-Annex I countries |
| Uganda                       | Africa                    | B    | Non-Annex I countries |
| Ukraine                      | non-EU Europe             | B    | Ukraine               |
| United Arab Emirates         | the Middle East           | B    | Non-Annex I countries |
| United Kingdom               | United Kingdom            | F    | EU15                  |
| United States                | United States             | F    | USA                   |
| Uruguay                      | other Latin America-31    | B    | Non-Annex I countries |
| Uzbekistan                   | Asia                      | B    | Non-Annex I countries |
| Vanuatu                      | Oceania                   | B    | Non-Annex I countries |
| Venezuela                    | other Latin America-31    | B    | Non-Annex I countries |
| Vietnam                      | Asia                      | B    | Non-Annex I countries |

| Country                                      | Emission estimation group |      | Uncertainty group     |
|----------------------------------------------|---------------------------|------|-----------------------|
|                                              | Name                      | Note |                       |
| Yemen                                        | the Middle East           | B    | Non-Annex I countries |
| Zambia                                       | Africa                    | B    | Non-Annex I countries |
| Zimbabwe                                     | Africa                    | B    | Non-Annex I countries |
| Anguilla                                     | Other                     | B    | Non-Annex I countries |
| Montserrat                                   | Other                     | B    | Non-Annex I countries |
| South Sudan                                  | Africa                    | B    | Non-Annex I countries |
| Bonaire, Sint Eustatius and Saba             | Other                     | B    | Non-Annex I countries |
| Cook Islands                                 | Other                     | B    | Non-Annex I countries |
| Falkland Islands                             | Other                     | B    | Non-Annex I countries |
| French Guiana                                | Other                     | B    | Non-Annex I countries |
| French Polynesia                             | Other                     | B    | Non-Annex I countries |
| Guadeloupe                                   | Other                     | B    | Non-Annex I countries |
| Isle of Man (under British governance)       | Other                     | B    | Non-Annex I countries |
| Jersey                                       | Other                     | B    | Non-Annex I countries |
| Martinique                                   | Other                     | B    | Non-Annex I countries |
| Mayotte                                      | Other                     | B    | Non-Annex I countries |
| Nauru                                        | Other                     | B    | Non-Annex I countries |
| Niue                                         | Other                     | B    | Non-Annex I countries |
| Norfolk Island (under Australian governance) | Other                     | B    | Non-Annex I countries |
| Northern Mariana Islands                     | Other                     | B    | Non-Annex I countries |
| Palau                                        | Oceania                   | B    | Non-Annex I countries |
| Pitcairn                                     | Other                     | B    | Non-Annex I countries |
| Reunion                                      | Other                     | B    | Non-Annex I countries |
| Saint Pierre and Miquelon                    | Other                     | B    | Non-Annex I countries |
| Sint Maarten                                 | Other                     | B    | Non-Annex I countries |
| Tokelau                                      | Other                     | B    | Non-Annex I countries |
| Turks and Caicos Islands                     | Other                     | B    | Non-Annex I countries |
| United States Virgin Islands                 | Other                     | B    | Non-Annex I countries |
| Wallis and Futuna Islands                    | Other                     | B    | Non-Annex I countries |
| Western Sahara                               | Other                     | B    | Non-Annex I countries |

B<sup>1</sup>: Broader regions, F<sup>2</sup>: Focus countries

**Table S2. Vehicle category**

|                                   |                             | PLDV <sub>s</sub>                                   | CLDV <sub>s</sub>                                                  | Buses                          | Trucks                                                                                                               | MCs            |
|-----------------------------------|-----------------------------|-----------------------------------------------------|--------------------------------------------------------------------|--------------------------------|----------------------------------------------------------------------------------------------------------------------|----------------|
| Global vehicle database           |                             |                                                     |                                                                    |                                |                                                                                                                      |                |
| WRS                               |                             | Passenger cars                                      | Vans & Pick-ups                                                    | Buses & Motor coaches          | Lorries & Road Tractors                                                                                              | Motorcycles    |
| ICCT                              |                             | Passenger cars                                      | Light duty commercial vehicles                                     | Heavy duty commercial vehicles |                                                                                                                      | Motorcycles    |
| OICA                              |                             | Passenger vehicles                                  | Commercial vehicles                                                |                                |                                                                                                                      | - <sup>1</sup> |
| IEA: Energy efficiency statistics |                             | Cars/light trucks                                   |                                                                    | Buses                          | Freight trucks                                                                                                       | -              |
| Regional vehicle database         |                             |                                                     |                                                                    |                                |                                                                                                                      |                |
| European Union                    | ACEA                        | Passenger cars                                      | Light commercial vehicles                                          | Buses                          | Medium and heavy commercial vehicles                                                                                 | -              |
|                                   | European Commission         | Passenger cars                                      | Light commercial vehicles (<3.5t)<br>Commercial Vehicles (3.5-16t) | Buses and Coaches              | Heavy Commercial Vehicles (>16t)                                                                                     | -              |
| United states                     | TEDB                        | Cars                                                | Two-axle four-tire & trucks<br>Light Trucks(<10 klb)               | Bus                            | Other single-unit trucks: Class 3-8<br>Medium Trucks(10-19.5 klb)<br>Light-heavy Trucks(19.5-26 klb)<br>Heavy Trucks | Motorcycl      |
| China                             | NBS                         | Mini Passenger Vehicles<br>Small Passenger Vehicles | Medium Passenger Vehicles<br>Large Passenger Vehicles              | Mini Trucks<br>Light Trucks    | Medium Trucks<br>Heavy Trucks                                                                                        | Motorcycles    |
| India                             | Statistical Year Book India | Cars, Jeeps, Taxis                                  | Buses                                                              | Light Motor                    | Goods vehicles                                                                                                       | Two-wheelers   |



|                           |                            | PLDV <sup>s</sup>                | CLDV <sup>s</sup>                                                     | Buses                                                    | Trucks                                                                                                                                                    | MCs                   |
|---------------------------|----------------------------|----------------------------------|-----------------------------------------------------------------------|----------------------------------------------------------|-----------------------------------------------------------------------------------------------------------------------------------------------------------|-----------------------|
| Japan                     | Japan Statistical Yearbook | Passenger cars                   | For freight use (trucks): Small Light motor vehicles                  | For people transport (buses)                             | For freight use (trucks): Ordinary                                                                                                                        | -                     |
| South Korea               | CEIC                       | Passenger Car                    | Truck                                                                 | Bus                                                      | Truck                                                                                                                                                     | Motorcycles           |
| Indonesia                 | CEIC                       | Passenger Cars                   | Truck                                                                 | Bus                                                      | Truck                                                                                                                                                     | Motorcycle            |
| Russia                    | CEIC                       | Passenger Car                    | Truck                                                                 | Buses                                                    | Truck                                                                                                                                                     | -                     |
| Canada                    | CEIC                       | RMV(<4.5 t)                      | RMV(4.5-15 t)                                                         | Bus                                                      | RMV(>15 t)                                                                                                                                                | Motorcycles & Mopeds  |
| Brazil                    | CEIC                       | Passenger Cars                   | RMV: Buses                                                            | Light Commercials                                        | Truck                                                                                                                                                     | Motorcycle            |
| <b>Regional inventory</b> |                            |                                  |                                                                       |                                                          |                                                                                                                                                           |                       |
| European Union            | EMEP                       | Passenger cars                   | Light duty vehicles                                                   | Heavy duty vehicles and busses                           |                                                                                                                                                           | Moped and motorcycles |
| United states             | NEI                        | Passenger Car                    | Passenger Truck<br>Light Commercial Truck<br>LDGT, LDGV<br>LDDT, LDDV | Transit Bus<br>Intercity Bus<br>School Bus<br>Motor Home | HDDV Class 2B, 3-7, 8A & B8<br>Single Unit Short-haul Truck<br>Single Unit Long-haul Truck<br>Combination Short-haul Truck<br>Combination Long-haul Truck | MC                    |
| China                     | MEIC                       | China-LDB<br>China-MB            | China-LDT<br>China-MT                                                 | China-HDB<br>China-MDB                                   | China-HDT<br>China-MDT                                                                                                                                    | MC                    |
| South Korea               | Airemiss                   | Car, Taxi,<br>Recreation Vehicle | Van, Trucks                                                           | Buses                                                    | Trucks                                                                                                                                                    | two-wheel             |

<sup>-1</sup>: Not covered

**Table S3. Fuel type**

|                           |                    | Gasoline                      | Diesel                        | NG               | LPG                             | Electricity      | Other                                                                                                                                                        |
|---------------------------|--------------------|-------------------------------|-------------------------------|------------------|---------------------------------|------------------|--------------------------------------------------------------------------------------------------------------------------------------------------------------|
| <b>Global data</b>        |                    |                               |                               |                  |                                 |                  |                                                                                                                                                              |
| IEA <sup>1</sup>          |                    | Motor gasoline                | Diesel and light fuel oil     | Gas              | LPG                             | Electricity      | Other sources                                                                                                                                                |
| IEA <sup>2</sup>          |                    | Motor gasoline excl. biofuels | Gas/diesel oil excl. biofuels | Natural gas      | Liquefied petroleum gases (LPG) | -                | Natural gas liquids, Other kerosene, Other liquid biofuels, Other oil products, Refinery gas, White spirit & SBP, Biodiesels, Biogasoline, Bitumen, Fuel oil |
| IPCC                      |                    | Motor Gasoline                | Gas/ Diesel Oil               | Natural Gas      | Liquefied Petroleum Gases       | -                | -                                                                                                                                                            |
| <b>Regional data</b>      |                    |                               |                               |                  |                                 |                  |                                                                                                                                                              |
| European Union            | ACEA               | Petrol                        | Diesel                        | LPG +Natural gas |                                 | Battery electric | Hybrid electric, Plug-in hybrid, Other + Unknown                                                                                                             |
| Japan                     | MVS 2016           | -                             | diesel oil                    | -                | -                               | -                | -                                                                                                                                                            |
| China                     | Shan et al. (2018) | Gasoline                      | Diesel oil                    | -                | -                               | -                | -                                                                                                                                                            |
| <b>Regional inventory</b> |                    |                               |                               |                  |                                 |                  |                                                                                                                                                              |
| United states             | NEI                | Gasoline                      | Diesel                        | CNG              | LPG                             | Electricity      | Ethanol                                                                                                                                                      |
| China                     | MEIC               | G                             | D                             | -                | -                               | -                | -                                                                                                                                                            |
| South Korea               | Airemiss           | gasoline                      | diesel oil                    | NG               | LPG                             | -                | hybrid                                                                                                                                                       |

**Table S4. The corresponding uncertainty ( $\sigma$ ) of CO<sub>2</sub> emissions for regions.**

| <b>Region</b>        | <b>1970</b>     | <b>1980</b>     | <b>1990</b>     | <b>2000</b>     | <b>2010</b>     | <b>2015</b>     | <b>2020</b>     |
|----------------------|-----------------|-----------------|-----------------|-----------------|-----------------|-----------------|-----------------|
| World                | (-5.5%, 6.2%)   | (-5.8%, 6.5%)   | (-5.8%, 6.5%)   | (-6%, 6.7%)     | (-7%, 8%)       | (-6%, 6.7%)     | (-5.9%, 6.6%)   |
| United States        | (-3.8%, 4%)     | (-3.7%, 3.8%)   | (-3.5%, 3.6%)   | (-3.4%, 3.5%)   | (-3.2%, 3.3%)   | (-3.2%, 3.3%)   | (-3.1%, 3.2%)   |
| European Union       | (-2.9%, 3%)     | (-2.7%, 2.8%)   | (-2.5%, 2.6%)   | (-2.3%, 2.4%)   | (-2.5%, 2.7%)   | (-2.5%, 2.6%)   | (-2.7%, 2.8%)   |
| China                | (-6.8%, 7.3%)   | (-7.1%, 7.7%)   | (-7.5%, 8.2%)   | (-7.9%, 8.5%)   | (-11.8%, 13.4%) | (-1.4%, 1.4%)   | (-1.2%, 1.2%)   |
| India                | (-4.7%, 5%)     | (-4.5%, 4.7%)   | (-4.3%, 4.5%)   | (-4.2%, 4.4%)   | (-4.1%, 4.2%)   | (-3.9%, 4.1%)   | (-3.9%, 4%)     |
| Latin Am. + Canada   | (-12.2%, 14.6%) | (-11.9%, 14.1%) | (-12.1%, 14.3%) | (-12.2%, 14.3%) | (-11.9%, 13.9%) | (-11.8%, 13.7%) | (-11.3%, 13.1%) |
| Middle East + Africa | (-15.4%, 18.3%) | (-15.1%, 18%)   | (-14.3%, 16.8%) | (-13.9%, 16.2%) | (-13.6%, 15.8%) | (-13.2%, 15.3%) | (-12.8%, 14.9%) |
| Rest of Asia         | (-7.3%, 8.6%)   | (-7%, 8.2%)     | (-7.1%, 8.3%)   | (-7.4%, 8.6%)   | (-8.5%, 9.8%)   | (-9.1%, 10.5%)  | (-9.3%, 10.7%)  |
| Rest of Europe       | (-6.4%, 7.1%)   | (-5.9%, 6.5%)   | (-5.4%, 5.8%)   | (-4.7%, 5.1%)   | (-4.9%, 5.3%)   | (-4.9%, 5.3%)   | (-4.9%, 5.3%)   |
| Rest of world        | (-4.5%, 4.8%)   | (-4.4%, 4.8%)   | (-4.4%, 4.8%)   | (-4.3%, 4.7%)   | (-4.5%, 5%)     | (-4.3%, 4.7%)   | (-4.2%, 4.6%)   |
