# Supplementary material for: Modeling fuel-, vehicle type-, and age-specific CO 2 emissions from global on-road vehicles, 1970–2020
Source: Copernicus journal article supplement (doi:10.5194/essd-2024-101), 2024-04-25
Supplement: Supplementary file 1 [file Figures.xlsx]

## Sheet: Fig2(a)FigS3
Country code	Region	Unit	Mark	2015
ABW	Latin Am. + Canada	number	Modelled vehicle stock	61057.5
AFG	Rest of Asia	number	Modelled vehicle stock	1.53596e+06
ALB	Rest of Europe	number	Modelled vehicle stock	478465
ARG	Latin Am. + Canada	number	Modelled vehicle stock	1.30852e+07
ATG	Latin Am. + Canada	number	Modelled vehicle stock	31077.2
AUS	Rest of world	number	Modelled vehicle stock	1.76659e+07
AUT	EU-28	number	Modelled vehicle stock	5.18362e+06
AZE	Rest of Europe	number	Modelled vehicle stock	1.2512e+06
BEL	EU-28	number	Modelled vehicle stock	6.40301e+06
BFA	Middle East + Africa	number	Modelled vehicle stock	300797
BGD	Rest of Asia	number	Modelled vehicle stock	862304
BGR	EU-28	number	Modelled vehicle stock	3.31123e+06
BIH	Rest of Europe	number	Modelled vehicle stock	921822
BLR	Rest of Europe	number	Modelled vehicle stock	3.43874e+06
BOL	Latin Am. + Canada	number	Modelled vehicle stock	1.01628e+06
BRA	Latin Am. + Canada	number	Modelled vehicle stock	6.46476e+07
BRB	Latin Am. + Canada	number	Modelled vehicle stock	120846
BRN	Rest of Asia	number	Modelled vehicle stock	259341
BTN	Rest of Asia	number	Modelled vehicle stock	61985.6
BWA	Middle East + Africa	number	Modelled vehicle stock	432204
CAN	Latin Am. + Canada	number	Modelled vehicle stock	2.30286e+07
CHE	Rest of Europe	number	Modelled vehicle stock	4.89811e+06
CHL	Latin Am. + Canada	number	Modelled vehicle stock	4.37611e+06
CHN	China	number	Modelled vehicle stock	1.72365e+08
CIV	Middle East + Africa	number	Modelled vehicle stock	47601.5
COL	Latin Am. + Canada	number	Modelled vehicle stock	5.1394e+06
CRI	Latin Am. + Canada	number	Modelled vehicle stock	1.06018e+06
CYP	EU-28	number	Modelled vehicle stock	600790
CZE	EU-28	number	Modelled vehicle stock	5.84951e+06
DEU	EU-28	number	Modelled vehicle stock	4.78748e+07
DNK	EU-28	number	Modelled vehicle stock	2.79866e+06
DOM	Latin Am. + Canada	number	Modelled vehicle stock	1.30235e+06
DZA	Middle East + Africa	number	Modelled vehicle stock	5.23896e+06
ECU	Latin Am. + Canada	number	Modelled vehicle stock	1.43264e+06
EGY	Middle East + Africa	number	Modelled vehicle stock	6.00615e+06
ESP	EU-28	number	Modelled vehicle stock	2.78333e+07
EST	EU-28	number	Modelled vehicle stock	822568
ETH	Middle East + Africa	number	Modelled vehicle stock	432357
FIN	EU-28	number	Modelled vehicle stock	3.5731e+06
FRA	EU-28	number	Modelled vehicle stock	3.96867e+07
GBR	EU-28	number	Modelled vehicle stock	3.52633e+07
GEO	Rest of Europe	number	Modelled vehicle stock	1.03594e+06
GIN	Middle East + Africa	number	Modelled vehicle stock	246643
GRC	EU-28	number	Modelled vehicle stock	5.49541e+06
GRD	Latin Am. + Canada	number	Modelled vehicle stock	31069.7
GRL	Rest of Europe	number	Modelled vehicle stock	6044.13
GTM	Latin Am. + Canada	number	Modelled vehicle stock	1.73646e+06
GUY	Latin Am. + Canada	number	Modelled vehicle stock	124951
HKG	China	number	Modelled vehicle stock	663608
HND	Latin Am. + Canada	number	Modelled vehicle stock	951220
HRV	EU-28	number	Modelled vehicle stock	1.74734e+06
HUN	EU-28	number	Modelled vehicle stock	3.86826e+06
IDN	Rest of Asia	number	Modelled vehicle stock	2.27493e+07
IND	India	number	Modelled vehicle stock	4.62162e+07
IRL	EU-28	number	Modelled vehicle stock	2.40386e+06
IRQ	Middle East + Africa	number	Modelled vehicle stock	6.65592e+06
ISL	Rest of Europe	number	Modelled vehicle stock	274103
ISR	Middle East + Africa	number	Modelled vehicle stock	3.05807e+06
JPN	Rest of Asia	number	Modelled vehicle stock	7.97907e+07
KAZ	Rest of Asia	number	Modelled vehicle stock	4.30048e+06
KEN	Middle East + Africa	number	Modelled vehicle stock	1.38699e+06
KOR	Rest of Asia	number	Modelled vehicle stock	2.34677e+07
LBN	Middle East + Africa	number	Modelled vehicle stock	1.73504e+06
LIE	Rest of Europe	number	Modelled vehicle stock	32057.9
LKA	Rest of Asia	number	Modelled vehicle stock	1.50123e+06
LUX	EU-28	number	Modelled vehicle stock	429353
MAC	China	number	Modelled vehicle stock	108058
MAR	Middle East + Africa	number	Modelled vehicle stock	3.41184e+06
MDA	Rest of Europe	number	Modelled vehicle stock	710601
MDV	Rest of Asia	number	Modelled vehicle stock	8886.95
MEX	Latin Am. + Canada	number	Modelled vehicle stock	3.71737e+07
MKD	Rest of Europe	number	Modelled vehicle stock	401715
MLT	EU-28	number	Modelled vehicle stock	333433
MMR	Rest of Asia	number	Modelled vehicle stock	756892
MNE	Rest of Europe	number	Modelled vehicle stock	212030
MNG	Rest of Asia	number	Modelled vehicle stock	441458
MOZ	Middle East + Africa	number	Modelled vehicle stock	582013
MUS	Middle East + Africa	number	Modelled vehicle stock	289759
NAM	Middle East + Africa	number	Modelled vehicle stock	322181
NER	Middle East + Africa	number	Modelled vehicle stock	252058
NIC	Latin Am. + Canada	number	Modelled vehicle stock	391522
NLD	EU-28	number	Modelled vehicle stock	9.1306e+06
NOR	Rest of Europe	number	Modelled vehicle stock	3.1238e+06
NPL	Rest of Asia	number	Modelled vehicle stock	301518
NZL	Rest of world	number	Modelled vehicle stock	3.56763e+06
PAK	Rest of Asia	number	Modelled vehicle stock	3.54421e+06
PAN	Latin Am. + Canada	number	Modelled vehicle stock	672312
PER	Latin Am. + Canada	number	Modelled vehicle stock	2.45047e+06
PHL	Rest of Asia	number	Modelled vehicle stock	3.8615e+06
POL	EU-28	number	Modelled vehicle stock	2.60348e+07
PRT	EU-28	number	Modelled vehicle stock	6.08009e+06
PRY	Latin Am. + Canada	number	Modelled vehicle stock	638245
ROU	EU-28	number	Modelled vehicle stock	6.402e+06
RUS	Rest of Europe	number	Modelled vehicle stock	4.7914e+07
RWA	Middle East + Africa	number	Modelled vehicle stock	80927.2
SHN	Middle East + Africa	number	Modelled vehicle stock	2679.44
SRB	Rest of Europe	number	Modelled vehicle stock	2.0406e+06
SUR	Latin Am. + Canada	number	Modelled vehicle stock	178028
SVK	EU-28	number	Modelled vehicle stock	2.35657e+06
SVN	EU-28	number	Modelled vehicle stock	1.18315e+06
SWE	EU-28	number	Modelled vehicle stock	5.27742e+06
SYC	Middle East + Africa	number	Modelled vehicle stock	19470
TGO	Middle East + Africa	number	Modelled vehicle stock	19244
THA	Rest of Asia	number	Modelled vehicle stock	1.54636e+07
TJK	Rest of Asia	number	Modelled vehicle stock	422099
TUN	Middle East + Africa	number	Modelled vehicle stock	1.57309e+06
TUR	Middle East + Africa	number	Modelled vehicle stock	1.523e+07
TWN	China	number	Modelled vehicle stock	7.59665e+06
USA	United States	number	Modelled vehicle stock	2.57091e+08
UZB	Rest of Asia	number	Modelled vehicle stock	2.09876e+06
VCT	Latin Am. + Canada	number	Modelled vehicle stock	25185.9
VNM	Rest of Asia	number	Modelled vehicle stock	2.44588e+06
ZAF	Middle East + Africa	number	Modelled vehicle stock	9.50564e+06
ZMB	Middle East + Africa	number	Modelled vehicle stock	649342
BDI	Middle East + Africa	number	Modelled vehicle stock	46845.5
BEN	Middle East + Africa	number	Modelled vehicle stock	163058
CMR	Middle East + Africa	number	Modelled vehicle stock	481067
MDG	Middle East + Africa	number	Modelled vehicle stock	161382
MRT	Middle East + Africa	number	Modelled vehicle stock	108050
GUM	Rest of Asia	number	Modelled vehicle stock	112818
LAO	Rest of Asia	number	Modelled vehicle stock	84530.9
MYS	Rest of Asia	number	Modelled vehicle stock	1.29386e+07
PSE	Rest of Asia	number	Modelled vehicle stock	137945
SGP	Rest of Asia	number	Modelled vehicle stock	3.91433e+06
TLS	Rest of Asia	number	Modelled vehicle stock	7696.36
ASM	Rest of world	number	Modelled vehicle stock	6494.97
FJI	Rest of world	number	Modelled vehicle stock	11302.7
FSM	Rest of world	number	Modelled vehicle stock	561.531
NCL	Rest of world	number	Modelled vehicle stock	210536
BMU	Latin Am. + Canada	number	Modelled vehicle stock	78186.2
CYM	Latin Am. + Canada	number	Modelled vehicle stock	63725.2
FRO	Rest of Europe	number	Modelled vehicle stock	38166.5
GIB	Rest of Europe	number	Modelled vehicle stock	26568.6
LVA	EU-28	number	Modelled vehicle stock	374789
CUB	Latin Am. + Canada	number	Modelled vehicle stock	1.01565e+06
HTI	Latin Am. + Canada	number	Modelled vehicle stock	71033.7
JAM	Latin Am. + Canada	number	Modelled vehicle stock	145766
KNA	Latin Am. + Canada	number	Modelled vehicle stock	18986.5
URY	Latin Am. + Canada	number	Modelled vehicle stock	1.04055e+06
BHR	Middle East + Africa	number	Modelled vehicle stock	617932
IRN	Middle East + Africa	number	Modelled vehicle stock	3.2259e+06
JOR	Middle East + Africa	number	Modelled vehicle stock	73562.9
KWT	Middle East + Africa	number	Modelled vehicle stock	2.20018e+06
QAT	Middle East + Africa	number	Modelled vehicle stock	1.53797e+06
ITA	EU-28	number	Modelled vehicle stock	3.34392e+07
ABW	Latin Am. + Canada	number	Statistical vehicle stock	60211
AFG	Rest of Asia	number	Statistical vehicle stock	1584617
ALB	Rest of Europe	number	Statistical vehicle stock	481114
ARG	Latin Am. + Canada	number	Statistical vehicle stock	13736226
ASM	Rest of world	number	Statistical vehicle stock	9523
ATG	Latin Am. + Canada	number	Statistical vehicle stock	35219
AUS	Rest of world	number	Statistical vehicle stock	17558171
AUT	EU-28	number	Statistical vehicle stock	5201750
AZE	Rest of Europe	number	Statistical vehicle stock	1301926
BDI	Middle East + Africa	number	Statistical vehicle stock	33510
BEL	EU-28	number	Statistical vehicle stock	6516899
BEN	Middle East + Africa	number	Statistical vehicle stock	36010
BFA	Middle East + Africa	number	Statistical vehicle stock	297070
BGD	Rest of Asia	number	Statistical vehicle stock	838588
BGR	EU-28	number	Statistical vehicle stock	3630500
BHR	Middle East + Africa	number	Statistical vehicle stock	579174
BIH	Rest of Europe	number	Statistical vehicle stock	904006
BLR	Rest of Europe	number	Statistical vehicle stock	3501954
BMU	Latin Am. + Canada	number	Statistical vehicle stock	26934
BOL	Latin Am. + Canada	number	Statistical vehicle stock	1128202
BRA	Latin Am. + Canada	number	Statistical vehicle stock	66376736
BRB	Latin Am. + Canada	number	Statistical vehicle stock	114848
BRN	Rest of Asia	number	Statistical vehicle stock	263566
BTN	Rest of Asia	number	Statistical vehicle stock	62105
BWA	Middle East + Africa	number	Statistical vehicle stock	434313
CAN	Latin Am. + Canada	number	Statistical vehicle stock	23214548
CHE	Rest of Europe	number	Statistical vehicle stock	4917387
CHL	Latin Am. + Canada	number	Statistical vehicle stock	4464951
CHN	China	number	Statistical vehicle stock	161729645
CIV	Middle East + Africa	number	Statistical vehicle stock	53054
CMR	Middle East + Africa	number	Statistical vehicle stock	50081
COL	Latin Am. + Canada	number	Statistical vehicle stock	5186532
CRI	Latin Am. + Canada	number	Statistical vehicle stock	1076401
CUB	Latin Am. + Canada	number	Statistical vehicle stock	413310
CYM	Latin Am. + Canada	number	Statistical vehicle stock	38588
CYP	EU-28	number	Statistical vehicle stock	594240
CZE	EU-28	number	Statistical vehicle stock	5788058
DEU	EU-28	number	Statistical vehicle stock	48144720
DNK	EU-28	number	Statistical vehicle stock	2841291
DOM	Latin Am. + Canada	number	Statistical vehicle stock	1253523
DZA	Middle East + Africa	number	Statistical vehicle stock	5363728
ECU	Latin Am. + Canada	number	Statistical vehicle stock	1494153
EGY	Middle East + Africa	number	Statistical vehicle stock	5787042
ESP	EU-28	number	Statistical vehicle stock	27462976
EST	EU-28	number	Statistical vehicle stock	783200
ETH	Middle East + Africa	number	Statistical vehicle stock	186681
FIN	EU-28	number	Statistical vehicle stock	3835327
FJI	Rest of world	number	Statistical vehicle stock	99627
FRA	EU-28	number	Statistical vehicle stock	39215637
FRO	Rest of Europe	number	Statistical vehicle stock	25864
FSM	Rest of world	number	Statistical vehicle stock	8600
GBR	EU-28	number	Statistical vehicle stock	35569635
GEO	Rest of Europe	number	Statistical vehicle stock	1043928
GIB	Rest of Europe	number	Statistical vehicle stock	20689
GIN	Middle East + Africa	number	Statistical vehicle stock	225620
GRC	EU-28	number	Statistical vehicle stock	6519420
GRD	Latin Am. + Canada	number	Statistical vehicle stock	36146
GRL	Rest of Europe	number	Statistical vehicle stock	5596
GTM	Latin Am. + Canada	number	Statistical vehicle stock	1862651
GUM	Rest of Asia	number	Statistical vehicle stock	109224
GUY	Latin Am. + Canada	number	Statistical vehicle stock	116818
HKG	China	number	Statistical vehicle stock	672701
HND	Latin Am. + Canada	number	Statistical vehicle stock	912108
HRV	EU-28	number	Statistical vehicle stock	1654084
HTI	Latin Am. + Canada	number	Statistical vehicle stock	80000
HUN	EU-28	number	Statistical vehicle stock	3711228
IDN	Rest of Asia	number	Statistical vehicle stock	22512918
IND	India	number	Statistical vehicle stock	4.57606e+07
IRL	EU-28	number	Statistical vehicle stock	2346907
IRN	Middle East + Africa	number	Statistical vehicle stock	18506234
IRQ	Middle East + Africa	number	Statistical vehicle stock	5616041
ISL	Rest of Europe	number	Statistical vehicle stock	261807
ISR	Middle East + Africa	number	Statistical vehicle stock	2964138
ITA	EU-28	number	Statistical vehicle stock	41547046
JAM	Latin Am. + Canada	number	Statistical vehicle stock	552279
JOR	Middle East + Africa	number	Statistical vehicle stock	1301172
JPN	Rest of Asia	number	Statistical vehicle stock	8.00009e+07
KAZ	Rest of Asia	number	Statistical vehicle stock	4397354
KEN	Middle East + Africa	number	Statistical vehicle stock	1403354
KNA	Latin Am. + Canada	number	Statistical vehicle stock	25085
KOR	Rest of Asia	number	Statistical vehicle stock	23076696
KWT	Middle East + Africa	number	Statistical vehicle stock	2004780
LAO	Rest of Asia	number	Statistical vehicle stock	390602
LBN	Middle East + Africa	number	Statistical vehicle stock	1651859
LIE	Rest of Europe	number	Statistical vehicle stock	32088
LKA	Rest of Asia	number	Statistical vehicle stock	1477689
LUX	EU-28	number	Statistical vehicle stock	422534
LVA	EU-28	number	Statistical vehicle stock	769843
MAC	China	number	Statistical vehicle stock	119396
MAR	Middle East + Africa	number	Statistical vehicle stock	3546998
MDA	Rest of Europe	number	Statistical vehicle stock	715480
MDG	Middle East + Africa	number	Statistical vehicle stock	194144
MDV	Rest of Asia	number	Statistical vehicle stock	9267
MEX	Latin Am. + Canada	number	Statistical vehicle stock	37338734
MKD	Rest of Europe	number	Statistical vehicle stock	425764
MLT	EU-28	number	Statistical vehicle stock	321535
MMR	Rest of Asia	number	Statistical vehicle stock	712402
MNE	Rest of Europe	number	Statistical vehicle stock	191514
MNG	Rest of Asia	number	Statistical vehicle stock	474056
MOZ	Middle East + Africa	number	Statistical vehicle stock	596735
MRT	Middle East + Africa	number	Statistical vehicle stock	41000
MUS	Middle East + Africa	number	Statistical vehicle stock	290172
MYS	Rest of Asia	number	Statistical vehicle stock	693207
NAM	Middle East + Africa	number	Statistical vehicle stock	331812
NCL	Rest of world	number	Statistical vehicle stock	113000
NER	Middle East + Africa	number	Statistical vehicle stock	257854
NIC	Latin Am. + Canada	number	Statistical vehicle stock	363617
NLD	EU-28	number	Statistical vehicle stock	9073339
NOR	Rest of Europe	number	Statistical vehicle stock	3181130
NPL	Rest of Asia	number	Statistical vehicle stock	304420
NZL	Rest of world	number	Statistical vehicle stock	3395215
PAK	Rest of Asia	number	Statistical vehicle stock	3236214
PAN	Latin Am. + Canada	number	Statistical vehicle stock	700543
PER	Latin Am. + Canada	number	Statistical vehicle stock	2544133
PHL	Rest of Asia	number	Statistical vehicle stock	3777194
POL	EU-28	number	Statistical vehicle stock	24260809
PRT	EU-28	number	Statistical vehicle stock	6050899
PRY	Latin Am. + Canada	number	Statistical vehicle stock	651642
PSE	Rest of Asia	number	Statistical vehicle stock	173284
QAT	Middle East + Africa	number	Statistical vehicle stock	1450187
ROU	EU-28	number	Statistical vehicle stock	6058663
RUS	Rest of Europe	number	Statistical vehicle stock	48881846
RWA	Middle East + Africa	number	Statistical vehicle stock	80237
SGP	Rest of Asia	number	Statistical vehicle stock	792282
SHN	Middle East + Africa	number	Statistical vehicle stock	2728
SRB	Rest of Europe	number	Statistical vehicle stock	1984258
SUR	Latin Am. + Canada	number	Statistical vehicle stock	185132
SVK	EU-28	number	Statistical vehicle stock	2346727
SVN	EU-28	number	Statistical vehicle stock	1172647
SWE	EU-28	number	Statistical vehicle stock	5279391
SYC	Middle East + Africa	number	Statistical vehicle stock	19912
TGO	Middle East + Africa	number	Statistical vehicle stock	20149
THA	Rest of Asia	number	Statistical vehicle stock	15881500
TJK	Rest of Asia	number	Statistical vehicle stock	433591
TLS	Rest of Asia	number	Statistical vehicle stock	17801
TUN	Middle East + Africa	number	Statistical vehicle stock	1648406
TUR	Middle East + Africa	number	Statistical vehicle stock	15315224
TWN	China	number	Statistical vehicle stock	7677070
URY	Latin Am. + Canada	number	Statistical vehicle stock	724224
USA	United States	number	Statistical vehicle stock	250761456
UZB	Rest of Asia	number	Statistical vehicle stock	2106365
VCT	Latin Am. + Canada	number	Statistical vehicle stock	25520
VNM	Rest of Asia	number	Statistical vehicle stock	2009400
ZAF	Middle East + Africa	number	Statistical vehicle stock	9927814
ZMB	Middle East + Africa	number	Statistical vehicle stock	663542

## Sheet: Fig2(b)FigS4
Country code	Region	Vehicle type	Unit	Mark	2015
ARG	Latin Am. + Canada	PLDVs	number	Survived newly registered vehicles	9.19856e+06
AUS	Rest of world	PLDVs	number	Survived newly registered vehicles	1.19205e+07
BRA	Latin Am. + Canada	PLDVs	number	Survived newly registered vehicles	4.8604e+07
CAN	Latin Am. + Canada	PLDVs	number	Survived newly registered vehicles	2.17916e+07
CHN	China	PLDVs	number	Survived newly registered vehicles	1.33701e+08
HKG	China	PLDVs	number	Survived newly registered vehicles	520070
MAC	China	PLDVs	number	Survived newly registered vehicles	108332
TWN	China	PLDVs	number	Survived newly registered vehicles	5.58478e+06
FRA	EU-28	PLDVs	number	Survived newly registered vehicles	2.99095e+07
DEU	EU-28	PLDVs	number	Survived newly registered vehicles	4.69122e+07
IND	India	PLDVs	number	Survived newly registered vehicles	2.90432e+07
IDN	Rest of Asia	PLDVs	number	Survived newly registered vehicles	1.30248e+07
ITA	EU-28	PLDVs	number	Survived newly registered vehicles	3.43496e+07
JPN	Rest of Asia	PLDVs	number	Survived newly registered vehicles	6.03812e+07
KOR	Rest of Asia	PLDVs	number	Survived newly registered vehicles	1.61374e+07
MEX	Latin Am. + Canada	PLDVs	number	Survived newly registered vehicles	2.59433e+07
NLD	EU-28	PLDVs	number	Survived newly registered vehicles	7.03954e+06
POL	EU-28	PLDVs	number	Survived newly registered vehicles	1.76173e+07
RUS	Rest of Europe	PLDVs	number	Survived newly registered vehicles	4.14613e+07
ESP	EU-28	PLDVs	number	Survived newly registered vehicles	1.98675e+07
THA	Rest of Asia	PLDVs	number	Survived newly registered vehicles	3.85176e+06
GBR	EU-28	PLDVs	number	Survived newly registered vehicles	3.3636e+07
USA	United States	PLDVs	number	Survived newly registered vehicles	116583374
ARG	Latin Am. + Canada	CLDVs	number	Survived newly registered vehicles	4.46767e+06
AUS	Rest of world	CLDVs	number	Survived newly registered vehicles	2.97738e+06
BRA	Latin Am. + Canada	CLDVs	number	Survived newly registered vehicles	9.95519e+06
CAN	Latin Am. + Canada	CLDVs	number	Survived newly registered vehicles	523086
CHN	China	CLDVs	number	Survived newly registered vehicles	1.45792e+07
HKG	China	CLDVs	number	Survived newly registered vehicles	73908.1
MAC	China	CLDVs	number	Survived newly registered vehicles	3205.9
TWN	China	CLDVs	number	Survived newly registered vehicles	849541
FRA	EU-28	CLDVs	number	Survived newly registered vehicles	6.06294e+06
DEU	EU-28	CLDVs	number	Survived newly registered vehicles	2.3652e+06
IND	India	CLDVs	number	Survived newly registered vehicles	5.52215e+06
IDN	Rest of Asia	CLDVs	number	Survived newly registered vehicles	6.33693e+06
ITA	EU-28	CLDVs	number	Survived newly registered vehicles	3.60754e+06
JPN	Rest of Asia	CLDVs	number	Survived newly registered vehicles	1.29447e+07
KOR	Rest of Asia	CLDVs	number	Survived newly registered vehicles	3.25716e+06
MEX	Latin Am. + Canada	CLDVs	number	Survived newly registered vehicles	5.78178e-37
NLD	EU-28	CLDVs	number	Survived newly registered vehicles	842582
POL	EU-28	CLDVs	number	Survived newly registered vehicles	2.38969e+06
RUS	Rest of Europe	CLDVs	number	Survived newly registered vehicles	4.12295e+06
ESP	EU-28	CLDVs	number	Survived newly registered vehicles	4.12434e+06
THA	Rest of Asia	CLDVs	number	Survived newly registered vehicles	5.73151e+06
GBR	EU-28	CLDVs	number	Survived newly registered vehicles	3.7174e+06
USA	United States	CLDVs	number	Survived newly registered vehicles	126804306
ARG	Latin Am. + Canada	Buses	number	Survived newly registered vehicles	65292
AUS	Rest of world	Buses	number	Survived newly registered vehicles	100688
BRA	Latin Am. + Canada	Buses	number	Survived newly registered vehicles	948801
CAN	Latin Am. + Canada	Buses	number	Survived newly registered vehicles	97498.4
CHN	China	Buses	number	Survived newly registered vehicles	2.45639e+06
HKG	China	Buses	number	Survived newly registered vehicles	21571.1
MAC	China	Buses	number	Survived newly registered vehicles	3550.54
TWN	China	Buses	number	Survived newly registered vehicles	24296.3
FRA	EU-28	Buses	number	Survived newly registered vehicles	99301.8
DEU	EU-28	Buses	number	Survived newly registered vehicles	71668.7
IND	India	Buses	number	Survived newly registered vehicles	1.48188e+06
IDN	Rest of Asia	Buses	number	Survived newly registered vehicles	2.49068e+06
ITA	EU-28	Buses	number	Survived newly registered vehicles	92689.1
JPN	Rest of Asia	Buses	number	Survived newly registered vehicles	218783
KOR	Rest of Asia	Buses	number	Survived newly registered vehicles	928355
MEX	Latin Am. + Canada	Buses	number	Survived newly registered vehicles	358873
NLD	EU-28	Buses	number	Survived newly registered vehicles	9271.45
POL	EU-28	Buses	number	Survived newly registered vehicles	96351
RUS	Rest of Europe	Buses	number	Survived newly registered vehicles	413163
ESP	EU-28	Buses	number	Survived newly registered vehicles	55034.3
THA	Rest of Asia	Buses	number	Survived newly registered vehicles	395692
GBR	EU-28	Buses	number	Survived newly registered vehicles	114625
USA	United States	Buses	number	Survived newly registered vehicles	922864
ARG	Latin Am. + Canada	Trucks	number	Survived newly registered vehicles	226452
AUS	Rest of world	Trucks	number	Survived newly registered vehicles	581928
BRA	Latin Am. + Canada	Trucks	number	Survived newly registered vehicles	5.63023e+06
CAN	Latin Am. + Canada	Trucks	number	Survived newly registered vehicles	474899
CHN	China	Trucks	number	Survived newly registered vehicles	7.16071e+06
HKG	China	Trucks	number	Survived newly registered vehicles	43363.8
MAC	China	Trucks	number	Survived newly registered vehicles	3625.49
TWN	China	Trucks	number	Survived newly registered vehicles	148230
FRA	EU-28	Trucks	number	Survived newly registered vehicles	533061
DEU	EU-28	Trucks	number	Survived newly registered vehicles	768933
IND	India	Trucks	number	Survived newly registered vehicles	9.44934e+06
IDN	Rest of Asia	Trucks	number	Survived newly registered vehicles	2.49819e+06
ITA	EU-28	Trucks	number	Survived newly registered vehicles	770880
JPN	Rest of Asia	Trucks	number	Survived newly registered vehicles	2.46621e+06
KOR	Rest of Asia	Trucks	number	Survived newly registered vehicles	2.31162e+06
MEX	Latin Am. + Canada	Trucks	number	Survived newly registered vehicles	9.45846e+06
NLD	EU-28	Trucks	number	Survived newly registered vehicles	166534
POL	EU-28	Trucks	number	Survived newly registered vehicles	732374
RUS	Rest of Europe	Trucks	number	Survived newly registered vehicles	3.67305e+06
ESP	EU-28	Trucks	number	Survived newly registered vehicles	510684
THA	Rest of Asia	Trucks	number	Survived newly registered vehicles	1.59435e+06
GBR	EU-28	Trucks	number	Survived newly registered vehicles	580850
USA	United States	Trucks	number	Survived newly registered vehicles	8.93142e+06
NER	Middle East + Africa	PLDVs	number	Survived newly registered vehicles	184678
NER	Middle East + Africa	CLDVs	number	Survived newly registered vehicles	30773.9
NER	Middle East + Africa	Buses	number	Survived newly registered vehicles	9115.29
NER	Middle East + Africa	Trucks	number	Survived newly registered vehicles	31599.3
TKM	Rest of Asia	PLDVs	number	Survived newly registered vehicles	873886
TKM	Rest of Asia	CLDVs	number	Survived newly registered vehicles	129110
TKM	Rest of Asia	Buses	number	Survived newly registered vehicles	46321.3
TKM	Rest of Asia	Trucks	number	Survived newly registered vehicles	17899.5
MKD	Rest of Europe	PLDVs	number	Survived newly registered vehicles	346972
MKD	Rest of Europe	CLDVs	number	Survived newly registered vehicles	1954.07
MKD	Rest of Europe	Buses	number	Survived newly registered vehicles	2334.95
MKD	Rest of Europe	Trucks	number	Survived newly registered vehicles	26902
NZL	Rest of world	PLDVs	number	Survived newly registered vehicles	2.41174e+06
NZL	Rest of world	CLDVs	number	Survived newly registered vehicles	178162
NZL	Rest of world	Buses	number	Survived newly registered vehicles	19723.8
NZL	Rest of world	Trucks	number	Survived newly registered vehicles	3.10987
CYM	Latin Am. + Canada	PLDVs	number	Survived newly registered vehicles	27795.8
CYM	Latin Am. + Canada	CLDVs	number	Survived newly registered vehicles	4962.51
CYM	Latin Am. + Canada	Buses	number	Survived newly registered vehicles	419.409
CYM	Latin Am. + Canada	Trucks	number	Survived newly registered vehicles	5044
DNK	EU-28	PLDVs	number	Survived newly registered vehicles	2.20299e+06
DNK	EU-28	CLDVs	number	Survived newly registered vehicles	278836
DNK	EU-28	Buses	number	Survived newly registered vehicles	14871.9
DNK	EU-28	Trucks	number	Survived newly registered vehicles	51659.7
BHS	Latin Am. + Canada	PLDVs	number	Survived newly registered vehicles	49460.6
BHS	Latin Am. + Canada	CLDVs	number	Survived newly registered vehicles	75458.9
BHS	Latin Am. + Canada	Buses	number	Survived newly registered vehicles	6709.27
BHS	Latin Am. + Canada	Trucks	number	Survived newly registered vehicles	10144.7
LBN	Middle East + Africa	PLDVs	number	Survived newly registered vehicles	1.26912e+06
LBN	Middle East + Africa	CLDVs	number	Survived newly registered vehicles	31167.1
LBN	Middle East + Africa	Buses	number	Survived newly registered vehicles	10065.8
LBN	Middle East + Africa	Trucks	number	Survived newly registered vehicles	96088.5
ARG	Latin Am. + Canada	PLDVs	number	Vehicle stock	9.87039e+06
AUS	Rest of world	PLDVs	number	Vehicle stock	1.38815e+07
BRA	Latin Am. + Canada	PLDVs	number	Vehicle stock	49822709
CAN	Latin Am. + Canada	PLDVs	number	Vehicle stock	22067778
CHN	China	PLDVs	number	Vehicle stock	138661700
HKG	China	PLDVs	number	Vehicle stock	539970
MAC	China	PLDVs	number	Vehicle stock	108205
TWN	China	PLDVs	number	Vehicle stock	6.57375e+06
FRA	EU-28	PLDVs	number	Vehicle stock	3.24875e+07
DEU	EU-28	PLDVs	number	Vehicle stock	4.48295e+07
IND	India	PLDVs	number	Vehicle stock	2.87672e+07
IDN	Rest of Asia	PLDVs	number	Vehicle stock	1.32033e+07
ITA	EU-28	PLDVs	number	Vehicle stock	3.68444e+07
JPN	Rest of Asia	PLDVs	number	Vehicle stock	6.45435e+07
KOR	Rest of Asia	PLDVs	number	Vehicle stock	16561665
MEX	Latin Am. + Canada	PLDVs	number	Vehicle stock	2.6908e+07
NLD	EU-28	PLDVs	number	Vehicle stock	8.02931e+06
POL	EU-28	PLDVs	number	Vehicle stock	20723000
RUS	Rest of Europe	PLDVs	number	Vehicle stock	40849288
ESP	EU-28	PLDVs	number	Vehicle stock	22355549
THA	Rest of Asia	PLDVs	number	Vehicle stock	7742434
GBR	EU-28	PLDVs	number	Vehicle stock	3.09229e+07
USA	United States	PLDVs	number	Vehicle stock	112864000
ARG	Latin Am. + Canada	CLDVs	number	Vehicle stock	5.26277e+06
AUS	Rest of world	CLDVs	number	Vehicle stock	2.97824e+06
BRA	Latin Am. + Canada	CLDVs	number	Vehicle stock	10134257
CAN	Latin Am. + Canada	CLDVs	number	Vehicle stock	591897
CHN	China	CLDVs	number	Vehicle stock	13867300
HKG	China	CLDVs	number	Vehicle stock	70431
MAC	China	CLDVs	number	Vehicle stock	3848
TWN	China	CLDVs	number	Vehicle stock	903739
FRA	EU-28	CLDVs	number	Vehicle stock	6.04466e+06
DEU	EU-28	CLDVs	number	Vehicle stock	2.36209e+06
IND	India	CLDVs	number	Vehicle stock	5.20849e+06
IDN	Rest of Asia	CLDVs	number	Vehicle stock	6.47484e+06
ITA	EU-28	CLDVs	number	Vehicle stock	3.86047e+06
JPN	Rest of Asia	CLDVs	number	Vehicle stock	1.27623e+07
KOR	Rest of Asia	CLDVs	number	Vehicle stock	3432937
MEX	Latin Am. + Canada	CLDVs	number	Vehicle stock	5.93593e-37
NLD	EU-28	CLDVs	number	Vehicle stock	893067
POL	EU-28	CLDVs	number	Vehicle stock	2447764
RUS	Rest of Europe	CLDVs	number	Vehicle stock	3.95159e+06
ESP	EU-28	CLDVs	number	Vehicle stock	4520616
THA	Rest of Asia	CLDVs	number	Vehicle stock	6135571
GBR	EU-28	CLDVs	number	Vehicle stock	3.96995e+06
USA	United States	CLDVs	number	Vehicle stock	128552549
ARG	Latin Am. + Canada	Buses	number	Vehicle stock	62645.7
AUS	Rest of world	Buses	number	Vehicle stock	97480.6
BRA	Latin Am. + Canada	Buses	number	Vehicle stock	965976
CAN	Latin Am. + Canada	Buses	number	Vehicle stock	90551
CHN	China	Buses	number	Vehicle stock	2.2976e+06
HKG	China	Buses	number	Vehicle stock	20901
MAC	China	Buses	number	Vehicle stock	3634
TWN	China	Buses	number	Vehicle stock	33890
FRA	EU-28	Buses	number	Vehicle stock	99499.7
DEU	EU-28	Buses	number	Vehicle stock	77924.9
IND	India	Buses	number	Vehicle stock	1.50426e+06
IDN	Rest of Asia	Buses	number	Vehicle stock	2.37105e+06
ITA	EU-28	Buses	number	Vehicle stock	96661.3
JPN	Rest of Asia	Buses	number	Vehicle stock	242765
KOR	Rest of Asia	Buses	number	Vehicle stock	920320
MEX	Latin Am. + Canada	Buses	number	Vehicle stock	357452
NLD	EU-28	Buses	number	Vehicle stock	9327.87
POL	EU-28	Buses	number	Vehicle stock	109844
RUS	Rest of Europe	Buses	number	Vehicle stock	390938
ESP	EU-28	Buses	number	Vehicle stock	60252
THA	Rest of Asia	Buses	number	Vehicle stock	428403
GBR	EU-28	Buses	number	Vehicle stock	112283
USA	United States	Buses	number	Vehicle stock	888907
ARG	Latin Am. + Canada	Trucks	number	Vehicle stock	219504
AUS	Rest of world	Trucks	number	Vehicle stock	581200
BRA	Latin Am. + Canada	Trucks	number	Vehicle stock	5453794
CAN	Latin Am. + Canada	Trucks	number	Vehicle stock	464322
CHN	China	Trucks	number	Vehicle stock	6.90305e+06
HKG	China	Trucks	number	Vehicle stock	41399
MAC	China	Trucks	number	Vehicle stock	3709
TWN	China	Trucks	number	Vehicle stock	165695
FRA	EU-28	Trucks	number	Vehicle stock	569850
DEU	EU-28	Trucks	number	Vehicle stock	897877
IND	India	Trucks	number	Vehicle stock	9.43823e+06
IDN	Rest of Asia	Trucks	number	Vehicle stock	2.50068e+06
ITA	EU-28	Trucks	number	Vehicle stock	867201
JPN	Rest of Asia	Trucks	number	Vehicle stock	2.45224e+06
KOR	Rest of Asia	Trucks	number	Vehicle stock	2161774
MEX	Latin Am. + Canada	Trucks	number	Vehicle stock	1.00733e+07
NLD	EU-28	Trucks	number	Vehicle stock	157569
POL	EU-28	Trucks	number	Vehicle stock	980201
RUS	Rest of Europe	Trucks	number	Vehicle stock	3690032
ESP	EU-28	Trucks	number	Vehicle stock	526559
THA	Rest of Asia	Trucks	number	Vehicle stock	1.57509e+06
GBR	EU-28	Trucks	number	Vehicle stock	576219
USA	United States	Trucks	number	Vehicle stock	8456000
NER	Middle East + Africa	PLDVs	number	Vehicle stock	183107
NER	Middle East + Africa	CLDVs	number	Vehicle stock	29966
NER	Middle East + Africa	Buses	number	Vehicle stock	10112
NER	Middle East + Africa	Trucks	number	Vehicle stock	34669
TKM	Rest of Asia	PLDVs	number	Vehicle stock	1.23078e+06
TKM	Rest of Asia	CLDVs	number	Vehicle stock	178662
TKM	Rest of Asia	Buses	number	Vehicle stock	64291.9
TKM	Rest of Asia	Trucks	number	Vehicle stock	25362.9
MKD	Rest of Europe	PLDVs	number	Vehicle stock	381677
MKD	Rest of Europe	CLDVs	number	Vehicle stock	2447.83
MKD	Rest of Europe	Buses	number	Vehicle stock	3224.79
MKD	Rest of Europe	Trucks	number	Vehicle stock	38470.7
NZL	Rest of world	PLDVs	number	Vehicle stock	3.1289e+06
NZL	Rest of world	CLDVs	number	Vehicle stock	230751
NZL	Rest of world	Buses	number	Vehicle stock	25923.8
NZL	Rest of world	Trucks	number	Vehicle stock	2.67603
CYM	Latin Am. + Canada	PLDVs	number	Vehicle stock	26609.7
CYM	Latin Am. + Canada	CLDVs	number	Vehicle stock	5846.32
CYM	Latin Am. + Canada	Buses	number	Vehicle stock	382.096
CYM	Latin Am. + Canada	Trucks	number	Vehicle stock	5846.32
DNK	EU-28	PLDVs	number	Vehicle stock	2.39058e+06
DNK	EU-28	CLDVs	number	Vehicle stock	395833
DNK	EU-28	Buses	number	Vehicle stock	13381.7
DNK	EU-28	Trucks	number	Vehicle stock	41511.9
BHS	Latin Am. + Canada	PLDVs	number	Vehicle stock	68291.7
BHS	Latin Am. + Canada	CLDVs	number	Vehicle stock	91907.6
BHS	Latin Am. + Canada	Buses	number	Vehicle stock	8187.79
BHS	Latin Am. + Canada	Trucks	number	Vehicle stock	12160.5
LBN	Middle East + Africa	PLDVs	number	Vehicle stock	1.54908e+06
LBN	Middle East + Africa	CLDVs	number	Vehicle stock	37591.4
LBN	Middle East + Africa	Buses	number	Vehicle stock	6201.56
LBN	Middle East + Africa	Trucks	number	Vehicle stock	61532.1

## Sheet: Fig3FigS7
Region	Category	Unit	1970	1971	1972	1973	1974	1975	1976	1977	1978	1979	1980	1981	1982	1983	1984	1985	1986	1987	1988	1989	1990	1991	1992	1993	1994	1995	1996	1997	1998	1999	2000	2001	2002	2003	2004	2005	2006	2007	2008	2009	2010	2011	2012	2013	2014	2015	2016
World	PLDVs	billion	0.21254	0.226821	0.250776	0.274769	0.286518	0.290954	0.302542	0.314296	0.325481	0.335713	0.346671	0.358366	0.369978	0.381395	0.392901	0.399989	0.410401	0.420671	0.430024	0.439728	0.449281	0.452225	0.459411	0.468559	0.478733	0.49052	0.505795	0.517107	0.535558	0.555786	0.578066	0.597218	0.611562	0.623777	0.640884	0.661891	0.683612	0.712241	0.74312	0.764244	0.783229	0.821949	0.844529	0.871327	0.908817	0.946385	0.989605
World	Buses	billion	0.00376348	0.00389102	0.00411648	0.00431412	0.00450974	0.00456635	0.00469823	0.00485356	0.00501028	0.00519397	0.00537795	0.00558172	0.00578766	0.00600355	0.00624145	0.00650743	0.00674683	0.00701098	0.00732994	0.00763475	0.00798189	0.00828771	0.00864683	0.00906754	0.00948376	0.00985888	0.0102801	0.010591	0.0110091	0.0116584	0.0126284	0.0129926	0.0137429	0.0135605	0.0131788	0.0141278	0.0146384	0.0156656	0.0159935	0.0166093	0.0168886	0.0173641	0.0176117	0.0174868	0.0179305	0.0180789	0.018284
World	CLDVs	billion	0.0284281	0.0307883	0.034464	0.0384504	0.0406512	0.0420284	0.0445982	0.0470463	0.0495063	0.0521072	0.0538922	0.0561813	0.0586273	0.0612334	0.0637325	0.0700703	0.0738135	0.0775342	0.0817977	0.0860135	0.0907496	0.0973115	0.103354	0.108386	0.113345	0.118273	0.123721	0.127162	0.130495	0.137271	0.14392	0.152122	0.156399	0.162286	0.171018	0.180939	0.18876	0.196696	0.202325	0.206946	0.215202	0.223387	0.243144	0.249606	0.259986	0.267406	0.276458
World	Trucks	billion	0.0120597	0.0127288	0.0138695	0.0147954	0.0154264	0.0158911	0.0163391	0.0169574	0.0175041	0.0181121	0.0185803	0.0192789	0.0198238	0.0203304	0.0208954	0.0221338	0.0225274	0.023181	0.0241941	0.0249439	0.0257438	0.0265286	0.0273232	0.0285172	0.0301575	0.0313887	0.0328715	0.034345	0.0360436	0.0381384	0.0399933	0.0411552	0.0425262	0.0440015	0.0457568	0.0482735	0.0502757	0.053088	0.054588	0.059169	0.0613058	0.0652555	0.068516	0.0711473	0.0737847	0.0748606	0.0772095
World	MCs	billion	0.0409864	0.0524744	0.0587292	0.0664686	0.0681341	0.0703416	0.0705698	0.0693904	0.0674691	0.0661694	0.0664355	0.0684381	0.071988	0.0757411	0.0796535	0.0834017	0.0872389	0.0910372	0.0947591	0.0990077	0.10359	0.108726	0.114828	0.122002	0.130367	0.139678	0.148668	0.158976	0.171693	0.186072	0.202096	0.220101	0.244173	0.269499	0.289135	0.319683	0.344209	0.37583	0.402957	0.433646	0.460596	0.505928	0.547379	0.559304	0.575918	0.609034	0.631631
United States	PLDVs	million	89.244	92.6746	97.0475	101.451	102.908	106.706	109.294	112.156	115.073	117.774	121.601	123.443	125.418	127.476	129.789	127.885	129.496	131.161	132.071	133.144	133.7	128.3	126.581	127.327	127.883	128.387	129.728	129.749	131.839	132.432	133.621	137.633	135.921	135.67	136.431	136.568	135.4	135.933	137.08	134.88	130.892	125.32	110.949	113.676	113.899	112.864	112.961
United States	Buses	million	0.377562	0.393123	0.411454	0.428855	0.435474	0.462156	0.471012	0.487402	0.494809	0.511778	0.528789	0.542441	0.561065	0.570933	0.587083	0.593485	0.597594	0.604987	0.605043	0.613434	0.626987	0.631279	0.644732	0.654432	0.670423	0.685503	0.694781	0.697548	0.71554	0.728777	0.746125	0.749548	0.760717	0.77655	0.795274	0.807053	0.821959	0.834436	0.843308	0.841993	0.846051	0.664276	0.762167	0.864549	0.872027	0.888907	0.976161
United States	CLDVs	million	14.211	15.1739	16.4222	17.9883	18.9757	20.418	22.1198	23.5963	25.1482	26.8725	27.876	29.009	30.2054	31.4689	32.5146	37.214	39.2282	41.0066	43.2274	45.462	48.275	53.033	57.091	59.994	62.904	65.738	69.134	70.224	71.33	75.356	79.085	84.188	85.011	87.187	91.845	95.337	99.125	101.47	101.235	100.154	102.702	105.288	120.477	120.523	124.681	128.553	132.716
United States	Trucks	million	3.681	3.76823	3.91661	4.10936	4.13275	4.232	4.31466	4.44478	4.45987	4.48008	4.374	4.46748	4.38501	4.23833	4.11269	4.593	4.29615	4.17778	4.41106	4.47149	4.487	4.481	4.37	4.408	4.906	5.024	5.266	5.293	5.414	5.763	5.926	5.704	5.651	5.849	6.161	6.395	6.649	8.117	8.228	8.356	8.217	7.79801	8.16491	8.126	8.329	8.456	8.747
United States	MCs	million	4.56444e-05	0.000120603	0.000599467	0.00279481	0.00175871	0.00449411	0.00851043	0.0156867	0.0263375	0.0418333	0.0685597	0.106595	0.162133	0.238697	0.34872	0.487417	0.666728	0.890374	1.14611	1.46293	1.84597	2.2629	2.72878	3.23197	3.75655	3.89719	3.8716	3.82637	3.87945	4.15243	4.34607	4.90306	5.00416	5.37003	5.76793	6.22715	6.67896	7.13848	7.75293	7.92972	8.0095	8.41485	8.42904	8.40469	8.41772	8.60094	8.67938
EU-28	PLDVs	million	69.9584	74.9889	82.7672	94.3514	96.9188	96.7739	101.296	105.447	109.002	111.776	114.39	119.737	125.132	130.533	135.946	141.379	146.784	152.104	157.311	162.326	167.134	171.456	176.042	179.312	182.177	185.56	189.741	189.543	194.175	200.077	205.084	209.541	213.088	215.269	218.235	221.991	225.85	230.884	234.875	237.665	241.66	244.381	246.083	248.076	250.065	253.96	258.569
EU-28	Buses	million	0.559753	0.566281	0.577257	0.592107	0.588668	0.579599	0.582642	0.585513	0.587933	0.589743	0.592488	0.604803	0.617315	0.630014	0.643052	0.656579	0.670563	0.684881	0.699366	0.713729	0.727802	0.737987	0.748433	0.760207	0.764068	0.764413	0.771879	0.758182	0.766415	0.773586	0.784161	0.789323	0.796243	0.799914	0.792835	0.792871	0.788631	0.796107	0.815097	0.818819	0.818982	0.819975	0.815411	0.81894	0.824288	0.837977	0.84694
EU-28	CLDVs	million	3.53493	3.98832	4.7926	6.05852	6.30638	5.84363	6.1305	6.35246	6.48342	6.50642	6.46937	6.87853	7.32152	7.79555	8.30478	8.85514	9.44368	10.056	10.6829	11.3065	11.912	12.5717	13.284	14.0005	14.6057	15.2987	15.9829	16.6851	17.3433	18.1076	19.0039	20.1029	21.3316	22.5593	23.8253	25.0393	26.1654	27.1699	27.9483	28.801	29.0476	29.4431	29.6521	29.8506	30.5202	31.0852	31.7669
EU-28	Trucks	million	2.01453	2.07988	2.18241	2.32463	2.38939	2.34057	2.3919	2.44274	2.49163	2.53768	2.58968	2.67925	2.77142	2.86616	2.96475	3.06829	3.17675	3.2885	3.40266	3.51617	3.62874	3.73236	3.85722	3.98336	4.11199	4.24325	4.38273	4.4391	4.58118	4.73168	4.88589	5.03505	5.18085	5.32248	5.46456	5.5988	5.72764	5.86715	5.99668	6.12176	6.16809	6.25606	6.28346	6.33919	6.50127	6.6429	6.76704
EU-28	MCs	million	3.04854	3.29067	3.68701	4.26732	4.60471	4.47919	4.79971	5.15192	5.53178	5.93112	6.3998	6.93916	7.52341	8.15197	8.83148	9.56859	10.3647	11.2151	12.1251	13.0868	14.0998	15.1186	16.2098	17.3328	18.5853	19.9879	20.6637	20.5033	21.5755	22.6213	23.5233	24.4458	25.4058	26.2233	26.6852	28.0418	29.022	29.9929	30.9292	31.5598	31.7806	32.3429	32.2509	32.6439	33.2241	33.5784	34.2052
China	PLDVs	million	2.60452	2.68245	2.74888	2.81876	2.87682	2.99909	3.08627	3.17076	3.26408	3.36354	3.4771	3.58954	3.69012	3.79217	3.9308	4.17627	4.38551	4.58485	4.82096	5.04352	5.27189	5.56365	6.00125	6.59432	7.22782	7.90451	8.60647	9.50029	10.2594	11.1252	12.2484	13.6128	15.6314	18.4615	21.1556	25.264	30.103	35.7893	42.0917	52.107	64.9334	78.5426	93.487	109.962	127.874	146.184	168.512
China	Buses	million	0.0457871	0.0490713	0.0553626	0.0625409	0.0708391	0.0817547	0.0918374	0.098979	0.109063	0.120437	0.136745	0.152538	0.1616	0.170337	0.193633	0.258784	0.303116	0.338247	0.381565	0.414005	0.442808	0.486344	0.567352	0.683823	0.798777	0.912205	1.01827	1.15557	1.24398	1.33955	1.46748	1.61867	1.84967	1.96458	2.07411	2.18666	2.29277	2.3929	2.48527	2.58728	2.67643	2.79239	2.65333	2.54023	2.57389	2.35603	2.35799
China	CLDVs	million	0.175582	0.206355	0.237407	0.272864	0.312355	0.373514	0.43225	0.488975	0.55744	0.639915	0.732001	0.818278	0.899046	0.982991	1.10237	1.30648	1.45646	1.66723	1.89068	2.0741	2.22604	2.42198	2.6872	3.04424	3.40443	3.58683	3.58224	3.77418	3.96856	4.28253	4.54497	4.86068	5.16644	5.47358	5.82474	6.31058	6.59896	7.09356	7.63254	8.8122	10.2345	11.518	12.8677	14.0758	15.0031	14.8453	15.623
China	Trucks	million	0.242493	0.273128	0.305761	0.341471	0.383695	0.433871	0.488295	0.538876	0.5993	0.671497	0.750169	0.821785	0.885727	0.950018	1.04538	1.21868	1.33471	1.50444	1.68153	1.81676	1.91892	2.05747	2.25421	2.52762	2.79699	2.90342	2.8434	2.95365	3.06493	3.27749	3.44353	3.65155	3.84866	3.98681	4.0635	4.23573	4.28585	4.49699	4.70382	5.29641	6.02045	6.59059	6.61687	6.87694	7.23842	7.11385	7.32467
China	MCs	million	8.05785	8.2686	8.46502	8.65836	8.84845	9.0644	9.27721	9.49992	9.73512	9.98522	10.2531	10.543	10.8596	11.2069	11.5894	12.0131	12.4867	13.0212	13.6291	14.326	15.1309	16.0669	17.5793	19.7729	22.195	25.0397	27.4754	31.6444	36.6716	43.1355	49.2896	55.1832	63.1548	72.0717	80.1206	89.1471	95.1959	101.318	104.047	109.275	114.994	115.328	115.3	110.618	106.424	102.614	96.2896
India	PLDVs	million	0.447433	0.450032	0.426844	0.447618	0.44439	0.542999	0.574404	0.611678	0.659002	0.712636	0.778184	0.844475	0.920012	1.00624	1.10366	1.21536	1.34382	1.49173	1.66256	1.85925	2.08384	2.33634	2.62354	2.95232	3.33086	3.76782	4.27046	4.84676	5.50275	6.24938	7.09714	7.53046	8.67192	9.24001	10.4555	11.6878	12.7861	14.015	17.0948	17.4338	19.1594	21.6833	24.8329	25.9349	26.0315	28.7672	30.4675
India	Buses	million	0.215777	0.220223	0.223153	0.22912	0.233608	0.244674	0.251485	0.258694	0.266533	0.274789	0.283747	0.292811	0.302378	0.312452	0.322973	0.334002	0.345574	0.357735	0.370541	0.38402	0.398162	0.412889	0.428334	0.444624	0.461907	0.480316	0.499927	0.520818	0.543023	0.566683	0.59194	0.631093	0.704304	0.607495	0.691508	1.01494	1.06008	1.10362	1.1069	1.12252	1.15197	1.23783	1.40224	1.38451	1.45289	1.50426	1.3436
India	CLDVs	million	0.401105	0.408058	0.407566	0.420391	0.426151	0.461694	0.477594	0.495104	0.515262	0.537007	0.561652	0.586365	0.613121	0.642072	0.673116	0.706697	0.743101	0.782624	0.825645	0.872405	0.922945	0.976968	1.0353	1.09872	1.16811	1.24434	1.32802	1.41982	1.52016	1.63015	1.75088	1.85098	1.98863	2.09261	2.26112	2.49243	2.66157	2.87998	3.23135	3.64147	3.7692	4.11691	4.43056	4.55793	4.92957	5.20849	5.64283
India	Trucks	million	0.32957	0.333312	0.324118	0.337193	0.338143	0.389884	0.408006	0.428885	0.45441	0.482712	0.516244	0.549841	0.58725	0.628927	0.674884	0.726195	0.783618	0.847929	0.920123	1.00093	1.09066	1.1889	1.29762	1.4187	1.55429	1.70654	1.87697	2.06723	2.27827	2.5125	2.77206	3.05753	3.43942	3.47172	3.87778	4.72982	5.13369	5.52903	5.74918	6.40425	6.80326	7.50044	8.30785	8.47033	9.0333	9.43823	10.014
India	MCs	million	8.18329	8.3223	8.29965	8.56492	8.67705	9.43484	9.76675	10.1337	10.5585	11.0181	11.5415	12.0666	12.6371	13.2567	13.9237	14.6486	15.4384	16.3004	17.244	18.2759	19.398	20.6049	21.9171	23.3543	24.9396	26.6965	28.643	30.7998	33.1826	35.8247	38.7611	41.6115	47.641	52.6447	58.7276	63.8747	69.0513	75.4195	81.8748	92.3443	102.532	115.646	133.164	139.864	139.919	155.14	170.235
Latin Am. + Canada	PLDVs	million	10.7975	11.2616	11.7852	12.5119	13.1677	13.2874	13.767	14.2776	14.8448	15.4329	16.0268	16.6584	17.2817	17.9066	18.6149	19.4293	20.3403	21.329	22.3633	23.4638	24.6655	26.1085	27.8922	30.0948	32.794	35.9203	39.6514	44.2174	49.7057	56.0271	63.3809	66.4784	69.0578	69.76	73.3204	77.3538	82.5581	88.1725	95.0517	98.1031	103.104	109.36	114.696	118.729	124.774	130.105	135.444
Latin Am. + Canada	Buses	million	0.292272	0.303114	0.320974	0.361918	0.383799	0.381495	0.395536	0.410038	0.425348	0.437581	0.447953	0.458301	0.469123	0.480178	0.494391	0.511354	0.53135	0.554844	0.580296	0.609451	0.641507	0.683634	0.733929	0.794141	0.864457	0.941538	1.02634	1.12076	1.22485	1.33798	1.46132	1.58039	1.65604	1.70491	1.82721	1.89036	1.99891	2.28482	2.03566	2.15541	2.27119	2.45015	2.57043	2.65934	2.79635	2.91981	3.02273
Latin Am. + Canada	CLDVs	million	1.90015	1.93799	1.96372	2.21676	2.43301	2.26272	2.30133	2.33359	2.3658	2.38003	2.38526	2.39306	2.40023	2.40937	2.42886	2.46241	2.5132	2.57849	2.65674	2.74233	2.85094	2.99327	3.16619	3.36403	3.59757	3.86662	4.18325	4.57818	5.07438	5.68714	6.45707	7.20532	7.83871	8.74384	9.97789	11.4053	12.6291	14.0633	15.8243	16.9978	18.4646	19.8793	20.5444	23.48	25.754	26.7774	28.2111
Latin Am. + Canada	Trucks	million	0.831581	0.863101	0.879399	0.976465	1.04368	1.07337	1.11924	1.15987	1.1967	1.23099	1.27447	1.33111	1.40091	1.47558	1.56002	1.64084	1.72023	1.81968	1.94722	2.11634	2.34602	2.65189	3.03459	3.51128	4.09932	4.76684	5.58755	6.51072	7.44424	8.29886	9.06491	9.47788	9.81187	10.193	10.6306	10.9813	11.3526	11.2764	11.4141	13.9511	14.5964	16.7049	17.4934	18.6462	18.9353	19.0575	19.6418
Latin Am. + Canada	MCs	million	1.13624	1.19137	1.23708	1.36292	1.5492	1.45695	1.50511	1.54981	1.59241	1.63177	1.66217	1.70374	1.74365	1.78373	1.83464	1.90597	1.99264	2.09913	2.21961	2.35234	2.5036	2.6923	2.93712	3.24637	3.63232	4.08722	4.62961	5.33111	6.28514	7.59643	9.36587	10.4505	11.7128	12.3947	13.2509	15.2399	17.8149	21.1861	25.6351	28.041	31.5162	35.4224	39.0746	42.4767	46.079	48.8967	52.6816
Middle East + Africa	PLDVs	million	9.93611	11.5862	14.1926	15.8926	17.5652	14.6593	15.1082	15.3733	15.3793	15.2432	14.9942	14.9918	14.8658	14.7474	14.6915	14.677	14.7413	14.8976	15.1822	15.5775	16.0973	16.6936	17.3173	18.0187	18.9351	19.9802	21.2594	22.8827	24.7244	26.6919	29.0267	30.7122	33.1355	34.8016	37.3381	39.0191	41.9345	45.6413	48.4657	51.4164	54.2846	57.4414	60.7418	63.853	67.5202	71.7016	76.3699
Middle East + Africa	Buses	million	0.659071	0.676417	0.741626	0.775279	0.867511	0.826237	0.867216	0.912244	0.959369	1.0206	1.07165	1.1265	1.18778	1.2607	1.32598	1.38159	1.43448	1.4822	1.51936	1.54634	1.57564	1.60976	1.6513	1.70328	1.7521	1.80569	1.86755	1.93991	2.01215	2.12014	2.22893	2.32447	2.33157	2.47561	2.7011	2.8363	2.9473	3.09036	3.22565	3.43248	3.44468	3.40854	3.3747	3.34864	3.38311	3.51457	3.60845
Middle East + Africa	CLDVs	million	2.77449	2.99111	3.20266	3.43515	3.64749	3.67126	3.81222	3.94002	4.0628	4.17873	4.30024	4.41282	4.52178	4.66421	4.81191	4.97871	5.16803	5.37618	5.59298	5.80184	5.99851	6.17252	6.32705	6.47384	6.62166	6.77224	6.93672	7.13414	7.34834	7.56889	7.82425	8.11084	8.53299	8.78082	9.11124	9.87073	10.5813	11.5808	12.5359	13.2964	14.3143	15.1117	15.915	16.6257	16.9756	17.8005	18.9642
Middle East + Africa	Trucks	million	0.798973	0.823937	0.9268	0.991532	1.07717	1.07739	1.13174	1.18924	1.24199	1.29575	1.34994	1.40299	1.45637	1.52358	1.5861	1.64735	1.70776	1.76546	1.82235	1.87826	1.93578	1.99289	2.04857	2.10737	2.17058	2.23974	2.32039	2.42005	2.53006	2.64242	2.76682	2.95517	3.16078	3.41002	3.67192	3.95638	4.17111	4.38206	4.61919	4.83048	4.91843	5.14532	5.4422	5.64708	5.93026	6.16041	6.45687
Middle East + Africa	MCs	million	10.4731	20.0555	21.7849	23.38	24.8406	25.3659	23.9875	20.7256	16.2741	12.0976	8.84985	7.09208	6.26419	5.40912	4.96709	4.70005	4.5632	4.51452	4.54946	4.65395	4.81829	5.02844	5.2617	5.52282	5.8236	6.17868	6.49002	6.86974	7.2803	7.74482	8.28567	9.02236	9.60451	10.4411	11.7221	12.7837	14.3382	16.1967	18.2044	20.6841	23.0927	25.8607	28.8938	31.0525	32.8908	35.0271	35.4485
Rest of Asia	PLDVs	million	4.31726	6.20153	13.041	16.5076	19.8486	21.522	22.8973	24.5823	26.3297	28.1811	29.8836	31.3287	32.8486	34.3575	35.8865	37.3635	38.997	40.8456	42.9454	45.7466	49.292	52.6932	55.9889	59.2255	62.8088	66.3674	70.2903	73.6957	75.6798	77.9028	80.0886	82.8721	85.6413	88.7859	90.6994	94.6792	97.6695	100.811	103.085	105.309	99.8383	112.925	117.826	111.031	115.109	118.45	122.378
Rest of Asia	Buses	million	1.01821	1.07206	1.15998	1.21957	1.26748	1.31459	1.34622	1.39151	1.44064	1.49458	1.55404	1.6233	1.68956	1.76339	1.84343	1.92716	2.00828	2.12356	2.30389	2.48252	2.70081	2.86503	3.02147	3.18781	3.34471	3.45441	3.59267	3.59248	3.69618	3.97715	4.52064	4.4655	4.79406	4.36032	3.40645	3.69836	3.7988	4.21917	4.54353	4.66977	4.70228	4.92666	4.92645	4.75024	4.88103	4.9086	4.99109
Rest of Asia	CLDVs	million	2.39002	2.9531	4.21389	4.72906	5.11892	5.4717	5.69622	6.10392	6.52279	7.01911	7.46338	7.8386	8.27886	8.74166	9.22945	9.74757	10.3409	11.0421	11.8087	12.5721	13.3304	13.8966	14.5164	15.1601	15.781	16.4693	17.2208	17.9017	18.3395	18.9086	19.3327	19.8251	20.4398	21.1427	21.6685	23.7831	24.1083	25.3219	26.5464	27.7016	28.9568	29.8198	30.8693	31.9034	33.361	34.2551	34.547
Rest of Asia	Trucks	million	1.99355	2.32347	2.96898	3.24263	3.47647	3.60879	3.62399	3.75937	3.92698	4.13373	4.29623	4.44935	4.62208	4.81086	5.01577	5.23147	5.45948	5.72181	5.98289	6.18189	6.46669	6.67717	6.85085	7.08393	7.15482	7.25076	7.40451	7.49695	7.54971	7.67438	7.78875	7.84889	7.89381	8.03138	7.95471	8.23877	8.61045	8.84596	9.03456	9.19717	9.40322	9.9328	10.2954	10.617	10.8347	11.0605	11.3613
Rest of Asia	MCs	million	3.82414	5.04886	8.89811	13.8109	13.1088	13.8654	14.4839	15.5049	16.8759	18.5209	20.649	22.9135	25.6634	28.5019	30.9144	32.7879	34.396	35.631	36.4574	37.4522	38.4054	39.5945	40.8779	42.268	44.1916	46.5634	49.7305	52.8554	55.6555	57.7863	61.2418	67.4424	74.9028	83.9976	86.7368	98.4212	106.319	118.888	128.762	138.278	143.209	166.754	183.947	187.571	202.217	218.44	227.329
Rest of Europe	PLDVs	million	24.7585	26.4209	28.0844	29.8562	31.6496	33.697	35.6932	37.7825	39.9654	42.2162	44.4764	46.6645	48.6409	50.3123	51.5668	52.3442	52.5879	52.2748	51.3617	49.8584	47.8265	45.2551	42.4003	39.576	37.1184	35.0879	33.5905	32.9134	32.8547	33.4864	34.8516	35.7652	36.9943	38.2693	39.3433	41.0177	42.638	45.9032	49.9896	51.7154	53.5177	56.1811	59.4752	63.2033	66.3995	66.8168	66.9354
Rest of Europe	Buses	million	0.586597	0.601565	0.616563	0.633168	0.649695	0.664762	0.680635	0.696799	0.713267	0.729908	0.746435	0.762633	0.777657	0.791205	0.802895	0.812443	0.819549	0.823863	0.824736	0.821539	0.813856	0.80192	0.787825	0.771211	0.75502	0.738138	0.727719	0.720587	0.717804	0.72136	0.730871	0.735361	0.748237	0.770016	0.786801	0.794771	0.819365	0.829368	0.818702	0.8565	0.849789	0.933971	0.972369	0.981115	1.00632	1.00531	0.988669
Rest of Europe	CLDVs	million	2.996	3.07967	3.16624	3.25557	3.34627	3.4566	3.55233	3.65099	3.75322	3.85883	3.96646	4.07178	4.17116	4.2616	4.33926	4.40193	4.44732	4.47388	4.4786	4.46025	4.41996	4.33726	4.23946	4.13897	4.04553	3.96999	3.91561	3.89497	3.90704	3.95128	4.02727	4.03378	4.05458	4.17905	4.28102	4.37837	4.47998	4.60138	4.7862	4.86262	4.94628	5.3579	5.43198	5.51141	5.59132	5.61883	5.63494
Rest of Europe	Trucks	million	2.1407	2.2358	2.33688	2.44324	2.55522	2.70446	2.82881	2.95843	3.0936	3.2327	3.37248	3.50574	3.62585	3.72711	3.80259	3.84884	3.86244	3.84199	3.78504	3.69304	3.57255	3.42155	3.25722	3.09686	2.95752	2.82336	2.7361	2.68916	2.68565	2.72322	2.81249	2.89277	2.99699	3.18278	3.36625	3.55718	3.75241	3.96313	4.22196	4.37549	4.53072	4.66442	5.23373	5.80625	6.35648	6.29551	6.2508
Rest of Europe	MCs	million	6.16826	6.20067	6.25935	6.32428	6.40694	6.5682	6.6384	6.70615	6.77268	6.84066	6.90889	6.97081	7.0314	7.08837	7.13994	7.18576	7.22607	7.26116	7.28393	7.29296	7.28178	7.24889	7.20189	7.15081	7.10739	7.07238	6.98094	6.92386	6.89021	6.8774	6.87984	6.57433	6.25755	5.88907	5.63485	5.42448	5.21149	5.04582	5.04122	4.76	4.65425	5.33954	5.47057	5.78082	5.81726	5.77324	5.77158
Rest of world	PLDVs	million	0.475941	0.554565	0.682179	0.931934	1.13899	0.766386	0.825776	0.894393	0.963078	1.01325	1.04319	1.1092	1.18028	1.26267	1.3717	1.51974	1.72464	1.98227	2.30586	2.70916	3.20962	3.81849	4.56384	5.45761	6.45752	7.54419	8.65774	9.75949	10.8168	11.7941	12.667	13.0728	13.421	13.5193	13.9058	14.31	14.673	15.0917	15.3866	15.6146	15.8389	16.1151	16.4381	16.8625	17.1445	17.537	17.9677
Rest of world	Buses	million	0.00844618	0.0091676	0.0101071	0.011564	0.0126692	0.0110851	0.0116513	0.0123821	0.013323	0.0145503	0.0160985	0.0183952	0.0211828	0.0243452	0.0280102	0.0320281	0.0363206	0.0406655	0.0451359	0.0497137	0.0543138	0.0588671	0.0634455	0.0680214	0.0722949	0.0766657	0.0809425	0.0851097	0.0891755	0.093135	0.0969159	0.0982105	0.102112	0.101098	0.103553	0.106452	0.110632	0.11484	0.11934	0.12458	0.127272	0.130291	0.13458	0.139257	0.140578	0.143482	0.148323
Rest of world	CLDVs	million	0.0448744	0.049803	0.0577494	0.073801	0.084862	0.0692385	0.0759273	0.0849771	0.0973619	0.114628	0.137844	0.172861	0.216226	0.267102	0.328071	0.397407	0.472643	0.551012	0.634042	0.721921	0.813724	0.908256	1.00721	1.11107	1.21751	1.32649	1.43704	1.54963	1.66412	1.77933	1.894	1.94405	2.03507	2.12753	2.2231	2.32243	2.41077	2.5152	2.58549	2.67876	2.76646	2.85214	2.95583	3.07816	3.17051	3.26297	3.3523
Rest of world	Trucks	million	0.0273471	0.0279694	0.0285242	0.0288546	0.0298527	0.0307843	0.032435	0.0352446	0.0396304	0.0469163	0.0570603	0.0713267	0.0892228	0.109824	0.133191	0.159142	0.186243	0.213456	0.241219	0.269029	0.297429	0.325352	0.35288	0.380081	0.406002	0.430753	0.45382	0.475094	0.495525	0.514838	0.532867	0.532325	0.542822	0.554262	0.566445	0.580478	0.592983	0.61031	0.620473	0.636301	0.648233	0.66302	0.678217	0.618208	0.626087	0.635815	0.645973
Rest of world	MCs	million	0.0949217	0.0963301	0.0974704	0.0971683	0.096658	0.102272	0.102702	0.102702	0.102359	0.102289	0.102606	0.102644	0.103088	0.103699	0.1041	0.104319	0.10442	0.104351	0.104311	0.104647	0.106132	0.108878	0.1139	0.122138	0.135242	0.155046	0.183377	0.221821	0.272302	0.333543	0.402774	0.467943	0.490096	0.466444	0.489332	0.52309	0.578022	0.643692	0.709803	0.774528	0.807807	0.81864	0.850289	0.892123	0.929603	0.962688	0.991117
World	Gasoline	million	0.247218	0.272685	0.302616	0.33258	0.345816	0.354366	0.366264	0.377046	0.386769	0.39658	0.408121	0.421238	0.435925	0.45074	0.465673	0.479958	0.494926	0.509676	0.524026	0.539102	0.554493	0.56569	0.581459	0.599496	0.619983	0.642385	0.667959	0.689559	0.719922	0.756114	0.795413	0.831901	0.865585	0.900578	0.935716	0.985125	1.02503	1.07674	1.1157	1.15856	1.19726	1.26744	1.33326	1.36358	1.41034	1.47005	1.52632
World	Diesel	million	0.0480426	0.0512803	0.0560899	0.0625718	0.0654628	0.0653463	0.0682241	0.0710154	0.0734871	0.0756718	0.0775849	0.0811011	0.0844968	0.0878915	0.0913496	0.0954003	0.0986907	0.102238	0.106063	0.109715	0.11341	0.117134	0.121134	0.125271	0.129768	0.134327	0.139497	0.14406	0.149854	0.157127	0.164926	0.173804	0.184497	0.193703	0.204919	0.219833	0.235655	0.25511	0.280432	0.298769	0.315474	0.34265	0.364081	0.380074	0.400445	0.418998	0.439475
World	NG	million	0.000381092	0.000410892	0.000465597	0.000499028	0.000527564	0.000530038	0.000541174	0.000553424	0.000568433	0.000577517	0.000584804	0.00061021	0.000635839	0.000661958	0.000715954	0.000776967	0.000834048	0.000887982	0.000927212	0.000951681	0.000782902	0.000998144	0.00101685	0.00104696	0.00104074	0.00104454	0.00106459	0.00108066	0.00112345	0.00119974	0.00124179	0.00150368	0.00177352	0.00204048	0.00225887	0.00258513	0.00291214	0.00327327	0.00362209	0.00400867	0.00426655	0.00497567	0.00563434	0.00639179	0.00720421	0.00800751	0.00892339
World	LPG	million	0.00183929	0.0020159	0.00245472	0.00278697	0.00306495	0.00316597	0.00332823	0.00352148	0.0037213	0.00402221	0.00419859	0.00441089	0.00464111	0.00488346	0.00513995	0.00540247	0.00569327	0.00602818	0.00646675	0.00691739	0.0080009	0.00858311	0.00926383	0.0100086	0.0105676	0.0112115	0.0120437	0.0126827	0.0130695	0.0136224	0.0142247	0.0153353	0.0153853	0.0155272	0.0156867	0.015814	0.0162048	0.0165724	0.0167754	0.016684	0.0175199	0.0158934	0.0150789	0.0151025	0.0142122	0.0135505	0.0122351
World	Electricity	million	1.48671e-05	1.56133e-05	1.67607e-05	1.84166e-05	1.91648e-05	1.90008e-05	1.97079e-05	2.03782e-05	2.10016e-05	2.1559e-05	2.20112e-05	2.30149e-05	2.40453e-05	2.51681e-05	2.62705e-05	2.74273e-05	2.85749e-05	2.97945e-05	3.11735e-05	3.24831e-05	3.39324e-05	3.51265e-05	3.63613e-05	3.7828e-05	3.91794e-05	4.06313e-05	4.22591e-05	4.34081e-05	4.53028e-05	4.72941e-05	4.9577e-05	8.90701e-05	9.42801e-05	9.34673e-05	9.56069e-05	0.000105479	0.000111471	0.000118373	0.000610298	0.000637011	0.000611266	0.000670483	0.00070473	0.00111806	0.00145603	0.00217508	0.00303671
World	Other	million	0.000281209	0.000295261	0.000311395	0.000341268	0.000348677	0.000354286	0.000370132	0.000386843	0.000404111	0.000421984	0.00044495	0.000463661	0.000482265	0.000500657	0.000519044	0.000537442	0.000555636	0.000573642	0.000591515	0.000608935	0.000625939	0.000638876	0.000651646	0.000670246	0.000686839	0.000708822	0.000729265	0.000754508	0.000783585	0.000815268	0.000847709	0.000955819	0.00106872	0.00118097	0.0012968	0.00145165	0.00157899	0.0017092	0.00183931	0.00195592	0.00208597	0.00225713	0.00242449	0.00260558	0.00278403	0.0029859	0.00320139
United States	Gasoline	million	102.254	106.59	112.141	118.041	120.449	125.624	129.86	134.153	138.566	142.942	147.715	150.693	153.864	157.197	160.603	163.542	167.262	170.864	174.226	177.806	181.509	181.109	183.865	187.962	191.946	195.383	200.041	201.092	204.302	209.154	214.202	223.501	222.882	224.947	230.641	234.742	237.758	241.114	242.712	239.554	238.022	235.664	236.603	238.532	242.913	245.343	249.258
United States	Diesel	million	4.99861	5.14832	5.37143	5.63806	5.69683	5.87872	6.01667	6.20501	6.28314	6.37431	6.35718	6.49242	6.47666	6.39685	6.34235	6.81631	6.59996	6.54484	6.79502	6.89989	6.97	6.94737	6.89019	6.98032	7.48736	7.65037	7.93746	7.9786	8.14518	8.53059	8.75649	8.7578	8.77727	9.13427	9.58523	9.75435	10.1018	11.5469	11.6012	11.8013	11.8327	11.3754	11.7699	12.3964	12.6179	13.1342	13.695
United States	NG	million	0	0	0	0	0	0	0	0	0	0	0	0	0	0	0	0	0	0	0	0	0	0.197515	0.200047	0.203951	0.208005	0.211709	0.216835	0.218029	0.22163	0.226748	0.232131	0.270934	0.282997	0.287681	0.303164	0.320283	0.329946	0.326181	0.327197	0.324694	0.30561	0.302053	0.299786	0.342277	0.261012	0.291559	0.320174
United States	LPG	million	0.26095	0.271937	0.286044	0.301073	0.307151	0.320252	0.330975	0.341885	0.352958	0.363932	0.375735	0.383222	0.390956	0.398971	0.407107	0.414679	0.423237	0.431591	0.439653	0.447917	0.456271	0.454211	0.459839	0.468907	0.478155	0.486566	0.498601	0.501383	0.509447	0.521339	0.533714	0.648172	0.404428	0.482667	0.469717	0.515555	0.483407	0.50376	0.497101	0.479308	0.504021	0.139122	0.0987563	0.106801	0.0795866	0.123102	0.123899
United States	Electricity	million	0	0	0	0	0	0	0	0	0	0	0	0	0	0	0	0	0	0	0	0	0	0	0	0	0	0	0	0	0	0	0	0	0.00110103	0.00124818	0.0013911	0.00169642	0.00194521	0.00204583	0.00209963	0.00202278	0.00216647	0.00402524	0.0106295	0.216598	0.326867	0.470645	0.682362
United States	Other	million	0	0	0	0	0	0	0	0	0	0	0	0	0	0	0	0	0	0	0	0	0	0	0	0	0	0	0	0	0	0	0	0	0	0	0	0	0	0	0	0	0	0	0	0	0	0	0
EU-28	Gasoline	million	54.3475	58.1822	64.2505	72.9829	74.9016	74.8211	78.3705	81.7223	84.7124	87.2144	89.7645	94.1247	98.5857	103.121	107.745	112.472	117.267	122.08	126.902	131.661	136.343	140.528	145.034	148.611	152.21	156.216	160.1	159.44	164.003	169.411	174.04	176.345	178.042	178.672	179.282	181.186	182.204	183.916	184.676	184.457	184.27	183.85	182.22	181.113	180.589	180.565	181.215
EU-28	Diesel	million	22.8621	24.7355	27.6338	32.2783	33.4276	32.6947	34.2121	35.5196	36.528	37.1563	37.5914	39.4593	41.3534	43.254	45.1634	47.0875	49.0107	50.901	52.7358	54.4767	56.1092	57.7827	59.5249	60.9477	62.0821	63.5022	65.1224	65.9692	67.7145	69.9489	72.003	76.0403	79.9412	83.4595	87.4498	91.7743	96.4617	101.497	106.132	110.546	114.957	118.905	122.265	125.792	129.504	134.127	139.103
EU-28	NG	million	0.249749	0.256934	0.268967	0.289834	0.305443	0.310418	0.322012	0.33374	0.345177	0.355489	0.364816	0.384442	0.404007	0.423404	0.442643	0.461571	0.480145	0.498201	0.515767	0.532705	0.549023	0.566516	0.582626	0.592432	0.593676	0.60716	0.617301	0.627412	0.644614	0.662663	0.678695	0.868928	1.06326	1.26575	1.44122	1.65977	1.88569	2.10666	2.32693	2.54007	2.74548	3.30342	3.86176	4.43781	5.04913	5.71045	6.44567
EU-28	LPG	million	1.37316	1.44139	1.53865	1.69774	1.82079	1.8328	1.92234	2.01337	2.10397	2.18954	2.27282	2.40382	2.53746	2.67426	2.81597	2.965	3.12337	3.29218	3.47295	3.66592	3.87216	4.09707	4.34498	4.56395	4.66762	4.81706	4.96927	5.13322	5.2919	5.46923	5.70781	5.69701	5.67635	5.5819	5.515	5.40471	5.43351	5.49044	5.59557	5.47304	5.42673	4.93798	4.32189	3.69499	3.03266	2.35051	1.64175
EU-28	Electricity	million	0.0026648	0.00293075	0.003373	0.00419918	0.00407595	0.00383368	0.00391049	0.00391071	0.00381342	0.00358948	0.00325232	0.00337146	0.00349164	0.00360922	0.00372315	0.00383382	0.00393709	0.0040271	0.00409781	0.00414273	0.00415649	0.00422628	0.00432315	0.00444146	0.00445102	0.00452455	0.00462479	0.00465471	0.00478465	0.00495193	0.00512461	0.00814324	0.0115125	0.0151508	0.0190762	0.0234294	0.0280962	0.0328909	0.0408	0.0463786	0.0508798	0.0560243	0.0608757	0.157675	0.254377	0.443107	0.633829
EU-28	Other	million	0.281008	0.295036	0.311147	0.340994	0.348388	0.354037	0.369871	0.386568	0.403822	0.421679	0.444626	0.463311	0.481888	0.50025	0.518605	0.536965	0.555119	0.573084	0.590915	0.608292	0.625257	0.638163	0.650908	0.669492	0.686067	0.70803	0.728452	0.753674	0.782735	0.814398	0.846824	0.954912	1.06779	1.18002	1.29582	1.41561	1.54039	1.66696	1.79339	1.90347	2.02579	2.1897	2.35542	2.53296	2.70575	2.90791	3.11545
China	Gasoline	million	10.385	10.6946	10.9833	11.2768	11.5636	11.9492	12.3023	12.6582	13.048	13.4733	13.9406	14.4216	14.9079	15.428	16.0608	16.9435	17.7714	18.7096	19.7703	20.8574	22.0208	23.3872	25.5477	28.6329	31.978	35.6116	38.6266	43.8197	49.7229	57.2719	64.5299	71.6769	81.5544	93.1348	103.56	116.401	126.907	138.453	147.003	162.132	180.418	194.444	209.472	221.323	234.984	249.036	264.69
China	Diesel	million	0.741183	0.784993	0.829064	0.877154	0.9285	1.00341	1.07351	1.13924	1.21689	1.30724	1.40845	1.50343	1.58812	1.67436	1.80071	2.02968	2.19492	2.40617	2.63328	2.81675	2.96953	3.20886	3.54133	3.98513	4.43902	4.72682	4.81087	5.11549	5.38819	5.7857	6.35595	7.0642	7.89279	8.60402	9.44925	10.4396	11.2428	12.2378	13.4829	15.3686	17.7523	19.5596	20.6906	21.8979	23.013	22.7525	23.6255
China	NG	million	0	0	0	0	0	0	0	0	0	0	0	0	0	0	0	0	0	0	0	0	0	0	0	0.00435622	0.00534193	0.00614532	0.00668592	0.00763153	0.00853976	0.00973854	0.0109826	0.0186033	0.0343547	0.0435913	0.0528933	0.0821205	0.0990736	0.172587	0.252032	0.347579	0.406274	0.462649	0.46143	0.516121	0.667003	0.659459	0.710539
China	LPG	million	0	0	0	0	0	0	0	0	0	0	0	0	0	0	0	0	6.67611e-05	6.94981e-05	7.07241e-05	8.70754e-05	0.000103362	0.000123665	0.000151332	0.000360332	0.000448693	0.00186644	0.0814795	0.0850709	0.0887382	0.0927318	0.0969759	0.166831	0.169022	0.175438	0.175723	0.186331	0.189276	0.185741	0.175014	0.175469	0.220902	0.236776	0.229434	0.261419	0.262384	0.270407	0.262356
China	Electricity	million	5.75037e-05	5.91344e-05	6.0494e-05	6.19369e-05	6.29594e-05	6.55447e-05	6.73496e-05	6.93161e-05	7.15254e-05	7.40583e-05	7.72064e-05	8.09795e-05	8.57831e-05	9.1999e-05	9.98745e-05	0.000109241	0.000119779	0.000130685	0.000140772	0.000149463	0.00015667	0.000162349	0.000166668	0.000170004	0.000172859	0.000175611	0.000177893	0.00018095	0.000184048	0.000186963	0.000189668	0.000387812	0.00038034	0.000377604	0.000392371	0.000383432	0.000376328	0.000354971	0.00273834	0.00272992	0.00260653	0.00282066	0.00293578	0.00306174	0.108648	0.318354	0.734307
China	Other	million	0	0	0	0	0	0	0	0	0	0	0	0	0	0	0	0	0	0	0	0	0	0	0	0	0	0	0	0	0	0	0	0	0	0	0	0.0350402	0.0375845	0.0411751	0.0448517	0.051341	0.0590244	0.0662058	0.0677852	0.0712894	0.0768856	0.0765414	0.0844457
India	Gasoline	million	8.90076	9.04787	9.00529	9.29894	9.41324	10.2842	10.6561	11.0692	11.5509	12.0741	12.6735	13.2752	13.9318	14.6484	15.4235	16.2705	17.1988	18.2182	19.3413	20.5773	21.93	23.3936	24.995	26.7602	28.7199	30.9053	33.3412	36.0552	39.0629	42.4179	46.1598	49.3651	56.3186	61.6812	68.3781	74.452	80.2768	87.4112	95.2392	106.032	116.892	131.297	150.582	157.577	157.675	174.221	190.256
India	Diesel	million	0.67551	0.685133	0.675118	0.699345	0.705124	0.788848	0.82113	0.857747	0.901649	0.950004	1.00665	1.06362	1.12672	1.19667	1.27351	1.35895	1.45424	1.56071	1.68005	1.81359	1.96197	2.12469	2.30515	2.50664	2.73302	2.98818	3.27512	3.59705	3.94184	4.34135	4.78682	5.28484	6.09263	6.34217	7.2477	8.92469	9.9525	11.0435	13.2227	14.3034	15.7255	17.9575	20.5394	21.4909	22.5474	24.5665	26.1714
India	NG	million	0	0	0	0	0	0	0	0	0	0	0	0	0	0	0	0	0	0	0	0	0	0	0	0	0	0	0	0	0.0198047	0.0218093	0.0240415	0.0262858	0.0283864	0.0283848	0.0291753	0.0347022	0.0419433	0.0485326	0.0526819	0.0617317	0.067906	0.0810064	0.100566	0.113704	0.125368	0.145882	0.160039
India	LPG	million	0	0	0	0	0	0	0	0	0	0	0	0	0	0	0	0	0	0	0	0	0	0	0	0	0	0	0	0	0	0	0	0	0	0	0.352995	0.380375	0.413555	0.436199	0.482178	0.489026	0.672936	0.784796	0.841773	0.949877	0.936522	1.02766	1.02453
India	Electricity	million	0.000900922	0.000919479	0.000931691	0.00095661	0.000975339	0.0010216	0.00105005	0.00108016	0.00111291	0.00114741	0.00118484	0.00122271	0.00126269	0.00130479	0.00134876	0.00139486	0.00144323	0.00149407	0.00154761	0.00160397	0.00166311	0.00172469	0.00178929	0.00185743	0.00192973	0.00200675	0.0020888	0.00217623	0.00225961	0.00235823	0.00246352	0.00534937	0.00567174	0.00478521	0.00549118	0.0078122	0.00788571	0.0077196	0.0603227	0.0604907	0.057378	0.0643089	0.0736087	0.0799391	0.0826629	0.0973564	0.0906113
India	Other	million	0	0	0	0	0	0	0	0	0	0	0	0	0	0	0	0	0	0	0	0	0	0	0	0	0	0	0	0	0	0	0	0	0	0	0	0	0	0	0	0	0	0	0	0	0	0	0
Latin Am. + Canada	Gasoline	million	12.9728	13.4881	14.0443	15.0547	16.003	15.9128	16.4381	16.9789	17.5617	18.06	18.6261	19.2364	19.8375	20.442	21.1234	21.9337	22.8515	23.8662	24.9147	26.0964	27.3743	28.919	30.7985	33.14	35.9989	39.3082	43.2447	48.0856	53.996	61.0271	69.4572	72.9914	76.1976	77.3195	80.8414	85.9585	91.9878	99.1409	105.244	109.636	115.39	122.165	128.11	134.376	141.891	146.992	153.67
Latin Am. + Canada	Diesel	million	1.98268	2.06674	2.13949	2.37246	2.57133	2.54589	2.64665	2.74837	2.85952	2.96691	3.08196	3.21711	3.36455	3.51735	3.69845	3.90211	4.12917	4.39464	4.68856	5.05554	5.49512	6.06571	6.77398	7.66776	8.77042	10.0382	11.5733	13.3787	15.3938	17.5014	19.8105	21.5302	23.2304	24.7912	27.5004	30.243	33.5756	36.9921	43.7239	48.5894	53.3179	60.2618	64.8227	69.9819	74.7633	78.9151	83.3993
Latin Am. + Canada	NG	million	0	0	0	0	0	0	0	0	0	0	0	0	0	0	0.0122907	0.0126985	0.0129914	0.013296	0.0174915	0.0183266	0.0196866	0.0207943	0.0221719	0.0238451	0.0267712	0.0289802	0.0314405	0.0370971	0.0406742	0.0811536	0.0908128	0.0968693	0.0942641	0.0970958	0.0988051	0.11003	0.13237	0.151944	0.161208	0.185658	0.212665	0.245898	0.28055	0.323266	0.375637	0.428456	0.473722
Latin Am. + Canada	LPG	million	0	3.92151e-37	3.70529e-26	1.17999e-18	3.19505e-15	1.66107e-10	1.49219e-08	5.12992e-07	6.40675e-06	0.0822873	0.0844247	0.0867	0.0890336	0.0914302	0.0938713	0.0964017	0.098923	0.101643	0.140774	0.108177	0.112456	0.117794	0.162721	0.171997	0.184077	0.199135	0.220061	0.247358	0.293794	0.326996	0.359871	0.55454	0.535196	0.569391	0.545369	0.538274	0.636167	0.676069	0.715474	0.715567	0.912709	1.01081	1.02305	1.12886	1.12165	1.18518	1.2094
Latin Am. + Canada	Electricity	million	0.00224555	0.00241664	0.00258334	0.00288912	0.00308154	0.003271	0.00346152	0.00365145	0.00384602	0.00402461	0.00419768	0.00436537	0.00453092	0.0046967	0.00482374	0.00500715	0.00519517	0.00539233	0.00559318	0.00580974	0.00604228	0.00632876	0.00666584	0.00706864	0.00754005	0.00806784	0.00865987	0.00933102	0.0100719	0.0108728	0.011694	0.0195062	0.0197516	0.0193638	0.0210774	0.0209635	0.0216425	0.0220703	0.116177	0.12137	0.118997	0.133913	0.142349	0.180569	0.186507	0.235509	0.249093
Latin Am. + Canada	Other	million	0	0	0	0	0	0	0	0	0	0	0	0	0	0	0	0	0	0	0	0	0	0	0	0	0	0	0	0	0	0	0	0	0	0	0	0	0	0	0	0	0	0	0	0	0	0	0
Middle East + Africa	Gasoline	million	16.5364	27.4588	31.1921	34.1684	36.8621	34.8543	33.744	30.5827	26.0437	21.6701	18.176	16.3871	15.4494	14.5335	14.0875	13.8702	13.8524	13.9964	14.3196	14.7902	15.4093	16.1131	16.8279	17.5729	18.5171	19.5722	20.671	22.1237	23.7225	25.3882	27.373	28.8738	30.5119	32.1078	34.9929	37.046	39.8533	43.3576	45.6292	49.6697	53.5448	57.4932	61.827	64.8465	67.7634	71.8731	75.0346
Middle East + Africa	Diesel	million	8.10259	8.67152	9.65341	10.3029	11.1323	10.7423	11.1592	11.5539	11.8699	12.1615	12.3854	12.6343	12.8415	13.0662	13.2893	13.5086	13.7562	14.0333	14.3404	14.6613	15.0095	15.3772	15.771	16.2095	16.7406	17.3569	18.0813	18.9914	20.0317	21.2205	22.5831	23.941	25.9377	27.4718	29.1967	31.0542	33.7223	37.1179	40.8494	43.3854	45.7849	48.6714	51.7131	54.6575	57.8912	61.1812	64.6037
Middle East + Africa	NG	million	3.67055e-09	3.98215e-09	4.34792e-09	4.68578e-09	5.13873e-09	5.79231e-09	6.26312e-09	6.75352e-09	7.25803e-09	7.77433e-09	8.28463e-09	8.76124e-09	9.25063e-09	9.7507e-09	1.02753e-08	1.08313e-08	1.14307e-08	1.20828e-08	1.27729e-08	1.34821e-08	1.4206e-08	1.49367e-08	1.56519e-08	1.63319e-08	1.69725e-08	1.758e-08	0.00654005	0.00704516	0.00752443	0.00788937	0.0133979	0.0163146	0.0175702	0.0196072	0.0219603	0.0239642	0.0293737	0.0353505	0.0381975	0.045923	0.0519663	0.0613404	0.0784483	0.0916963	0.103418	0.123273	0.1435
Middle East + Africa	LPG	million	5.40769e-09	5.86677e-09	6.40565e-09	6.90341e-09	7.57072e-09	8.53361e-09	9.22724e-09	9.94973e-09	1.0693e-08	1.14537e-08	1.22055e-08	1.29076e-08	1.36286e-08	1.43654e-08	0.000154157	0.000160424	0.00016688	1.78012e-08	1.88179e-08	1.98627e-08	0.000185008	0.000184111	0.000183891	0.0364449	0.0380423	0.0399286	0.107456	0.116316	0.125079	0.142706	0.153589	0.27411	0.279294	0.29036	0.311108	0.319756	0.345019	0.358168	0.353866	0.368791	0.496401	0.558792	0.56639	0.731793	0.742016	0.792001	0.821428
Middle East + Africa	Electricity	million	0.00274997	0.00282257	0.00309491	0.00323572	0.00362072	0.00344827	0.00361933	0.00380725	0.00400387	0.00425928	0.00447223	0.00470105	0.00495671	0.00526098	0.00553279	0.00576492	0.00598579	0.00618586	0.00634121	0.00645411	0.0065759	0.00671851	0.00689206	0.00710209	0.00730599	0.00752977	0.0077782	0.00807932	0.00837998	0.00882911	0.0092781	0.0197306	0.0188143	0.0195458	0.0218094	0.0222796	0.0223947	0.0221131	0.180189	0.1901	0.176711	0.182953	0.182518	0.199315	0.200102	0.234635	0.244806
Middle East + Africa	Other	million	2.49741e-10	2.70942e-10	2.95829e-10	3.18817e-10	3.49635e-10	3.94103e-10	4.26137e-10	4.59503e-10	4.9383e-10	5.28958e-10	5.63679e-10	5.96107e-10	6.29404e-10	6.63429e-10	6.99125e-10	7.36953e-10	7.77732e-10	8.22102e-10	8.69059e-10	9.17307e-10	9.66562e-10	1.01628e-09	1.06494e-09	1.11121e-09	1.15479e-09	1.19613e-09	1.2356e-09	1.27359e-09	1.30941e-09	1.34374e-09	1.37642e-09	1.80237e-09	2.22719e-09	3.61592e-09	1.33687e-08	1.66115e-08	3.02609e-08	1.73038e-07	4.07121e-07	5.70946e-07	7.66098e-07	1.02532e-06	1.39823e-06	1.56926e-06	1.68634e-06	1.68195e-06	1.46653e-06
Rest of Asia	Gasoline	million	11.0695	14.8589	26.9529	35.8036	38.7786	41.4396	43.4965	46.4781	49.7968	53.5246	57.4651	61.2346	65.5529	69.9	73.8407	77.2174	80.5119	83.6725	86.6857	90.3105	94.4003	98.3936	102.347	106.451	111.464	116.99	123.853	130.418	135.597	140.398	146.467	155.566	165.901	178.278	183.185	199.573	209.893	225.524	236.246	247.889	249.445	281.057	301.555	301.172	318.852	337.014	347.525
Rest of Asia	Diesel	million	2.18537	2.33628	2.56004	2.76653	2.94522	3.17345	3.32568	3.55016	3.89214	4.30951	4.79272	5.26681	5.82096	6.46318	7.14816	7.85241	8.60008	9.46926	10.4029	11.4692	12.8323	14.0442	15.2667	16.4168	17.3867	18.2815	19.126	19.5172	19.6385	19.9638	20.3982	20.4027	20.9746	21.1396	20.4855	22.2436	23.5792	25.6394	28.7991	30.4785	29.7432	36.566	39.7899	38.1198	41.1691	43.9063	47.286
Rest of Asia	NG	million	0.0797626	0.0977493	0.135352	0.147641	0.155662	0.152643	0.146848	0.1442	0.140083	0.136314	0.133049	0.129589	0.125986	0.122322	0.119479	0.117869	0.11705	0.116989	0.121463	0.120218	0.128816	0.127509	0.126062	0.125153	0.125201	0.123571	0.122863	0.121558	0.121116	0.121008	0.1216	0.166575	0.211955	0.255562	0.268126	0.307556	0.340037	0.357203	0.372994	0.379349	0.338855	0.384485	0.397197	0.390518	0.430188	0.436914	0.445854
Rest of Asia	LPG	million	0.204875	0.302253	0.629663	0.787765	0.936482	1.01232	1.07404	1.16481	1.262	1.37381	1.45008	1.51683	1.59693	1.68371	1.77489	1.86335	1.96589	2.09826	2.28058	2.5272	2.82505	3.15194	3.50629	3.92247	4.29465	4.69948	5.12553	5.47418	5.55249	5.75464	5.97363	6.29339	6.55819	6.62205	6.51153	6.67814	6.67441	6.54572	6.37591	6.22407	6.40877	6.15405	5.92146	5.96471	5.71949	5.47998	5.06172
Rest of Asia	Electricity	million	0.0037287	0.00383293	0.00394881	0.00410968	0.00423801	0.00441867	0.0045745	0.00474008	0.00492558	0.00511451	0.0053343	0.00559832	0.00583093	0.00607709	0.00634044	0.00661284	0.00685269	0.00716526	0.00767463	0.00814744	0.00876111	0.00921365	0.00959044	0.0100619	0.0104675	0.0107798	0.0111336	0.0109045	0.0112515	0.0114224	0.0118527	0.0250168	0.0262157	0.022412	0.0155971	0.0180841	0.0184221	0.0203539	0.17784	0.18417	0.174235	0.196366	0.199736	0.22558	0.232048	0.277522	0.288112
Rest of Asia	Other	million	2.18428e-07	2.29209e-07	2.42177e-07	2.56937e-07	2.64752e-07	2.70473e-07	2.7993e-07	2.89231e-07	2.98241e-07	3.06851e-07	3.15657e-07	3.24725e-07	3.33816e-07	3.42983e-07	3.5236e-07	3.62054e-07	3.72069e-07	3.82358e-07	3.93003e-07	4.04005e-07	4.15412e-07	4.27267e-07	4.39586e-07	4.52346e-07	4.65791e-07	4.79832e-07	4.94091e-07	5.0842e-07	5.22662e-07	5.3653e-07	5.49867e-07	7.19577e-07	8.85442e-07	1.36085e-06	3.71312e-06	3.36255e-06	4.67258e-06	5.43551e-06	4.84696e-06	8.00654e-06	9.39515e-06	1.23184e-05	1.54706e-05	1.70494e-05	1.68188e-05	1.63399e-05	1.34705e-05
Rest of Europe	Gasoline	million	30.1811	31.7163	33.2738	34.938	36.6307	38.6154	40.4698	42.4052	44.417	46.4953	48.5834	50.5948	52.4179	53.968	55.1301	55.8504	56.0983	55.8522	55.0831	53.779	51.7517	49.4625	46.9043	44.3332	42.1231	40.2946	38.8635	38.1935	38.0966	38.5985	39.7923	39.722	39.9539	40.0741	39.9955	40.4249	40.6027	41.645	42.4688	42.5093	42.4137	44.4991	45.6082	46.9689	47.9575	47.0122	46.1368
Rest of Europe	Diesel	million	6.41544	6.76412	7.12638	7.51079	7.90847	8.40657	8.84905	9.31196	9.79561	10.2949	10.798	11.282	11.7205	12.0935	12.3752	12.553	12.6158	12.5584	12.3725	12.0605	11.5482	11.0149	10.431	9.85865	9.35853	8.93541	8.64549	8.51194	8.52623	8.69109	9.02459	9.53168	10.3361	11.4095	12.6061	13.9031	15.4011	17.324	20.7578	22.2347	24.0688	26.7558	29.7324	32.8609	35.7171	36.9386	37.9074
Rest of Europe	NG	million	0.0515547	0.0561822	0.06125	0.0615236	0.0664281	0.066946	0.0722821	0.0754504	0.083138	0.0856771	0.0866972	0.0959237	0.105581	0.115958	0.141257	0.184532	0.223551	0.259169	0.272147	0.280072	0.0849993	0.083274	0.0831132	0.0940668	0.0782557	0.0631477	0.0587607	0.0573953	0.0547417	0.0636353	0.064765	0.0334872	0.033843	0.035719	0.0365121	0.0396071	0.0460526	0.0659915	0.0809662	0.113165	0.126651	0.122225	0.14046	0.160048	0.174496	0.192991	0.205422
Rest of Europe	LPG	million	0	0	0	0	0	0	0	0	0	0	0	0	0	0	0.00153502	0.00155967	0.00152593	0.0015164	0.00147895	0.00146496	0.524173	0.498373	0.462341	0.44192	0.417854	0.392278	0.376679	0.372533	0.37099	0.399423	0.413211	0.705219	0.718845	0.761774	0.764781	0.795378	0.841919	1.2984	1.52145	1.68447	1.86272	1.07139	1.07231	1.24409	1.26324	1.27863	1.22886
Rest of Europe	Electricity	million	0.00169227	0.00173095	0.00177201	0.0018169	0.00185495	0.00186745	0.00191099	0.00196511	0.00203602	0.00213055	0.00225711	0.00240716	0.00258467	0.00279215	0.00303004	0.00329411	0.00357922	0.00388188	0.0042006	0.00453597	0.00487737	0.00498999	0.00510354	0.00521977	0.00534608	0.00548581	0.00562756	0.00579869	0.00597192	0.00615209	0.00633308	0.00814941	0.00806189	0.00817307	0.00839087	0.00844442	0.00849602	0.00849642	0.0275983	0.027382	0.0257742	0.0272749	0.0291758	0.0477623	0.0572324	0.0859196	0.101458
Rest of Europe	Other	million	0.000200543	0.00022405	0.000247199	0.000274088	0.00028846	0.000248055	0.000260201	0.000273726	0.000288889	0.000305142	0.000323461	0.000349299	0.000376416	0.000405869	0.000438899	0.000475732	0.000515769	0.000557459	0.000599983	0.000641992	0.000682124	0.000712534	0.000736915	0.000753472	0.000770777	0.000790533	0.000812729	0.00083279	0.00084932	0.000868424	0.000883906	0.000904924	0.000924093	0.000945039	0.000966216	0.000986412	0.00100258	0.00103045	0.00104288	0.00107425	0.00110347	0.00114538	0.00119021	0.00122486	0.00126393	0.00131186	0.00136754
Rest of world	Gasoline	million	0.57123	0.648801	0.773498	1.01544	1.21387	0.865576	0.926436	0.997606	1.07184	1.12663	1.1766	1.27046	1.37734	1.50152	1.65855	1.85785	2.11284	2.4169	2.78325	3.22414	3.75486	4.38381	5.13908	6.03248	7.02567	8.10476	9.21732	10.3312	11.4192	12.4479	13.392	13.8597	14.2237	14.3644	14.8396	15.3415	15.5498	16.1756	16.4867	16.6804	16.8679	16.9664	17.2782	17.6697	17.7091	17.992	18.5298
Rest of world	Diesel	million	0.0791342	0.0877774	0.101152	0.126316	0.147356	0.112488	0.120034	0.12949	0.140307	0.151118	0.163186	0.182128	0.204366	0.22942	0.25844	0.291759	0.329572	0.370097	0.414141	0.461696	0.513775	0.56831	0.630206	0.698794	0.770687	0.847304	0.924687	1.00058	1.0744	1.14408	1.20776	1.25116	1.31376	1.35116	1.39876	1.49595	1.61827	1.71104	1.86374	2.06116	2.29239	2.59764	2.75784	2.8765	3.22191	3.47626	3.68375
Rest of world	NG	million	2.57473e-05	2.67666e-05	2.77084e-05	2.87019e-05	2.99557e-05	3.13546e-05	3.25736e-05	3.40895e-05	3.54174e-05	3.6749e-05	0.000241459	0.000254108	0.000264632	0.00027441	0.000284858	0.000296341	0.00031073	0.000326737	0.000343219	0.000359885	0.000376385	0.00253553	0.00283428	0.00315449	0.00348953	0.00382703	0.00416134	0.00448763	0.0048025	0.00509788	0.00536852	0.00568331	0.00689182	0.00708309	0.00702145	0.00710065	0.00765588	0.00881783	0.00987654	0.0105025	0.0111451	0.0125881	0.0141454	0.0163411	0.0179614	0.0185247	0.0184657
Rest of world	LPG	million	0.000312279	0.000329377	0.000356602	0.000390891	0.000527607	0.000596209	0.000875066	0.00141479	0.00237829	0.0126301	0.0155341	0.0203189	0.0267297	0.035093	0.0464247	0.0613192	0.0800831	0.10292	0.131252	0.166633	0.210506	0.263419	0.327326	0.402589	0.486763	0.57519	0.664579	0.752635	0.837102	0.915327	0.985869	0.99606	1.04398	1.0436	1.04044	0.995473	1.1875	1.07788	1.05883	1.07431	1.01472	0.999733	1.00383	1.01999	1.05462	1.04303	0.861165
Rest of world	Electricity	million	0.000827406	0.000900821	0.000996493	0.00114747	0.00125533	0.00107455	0.0011137	0.00115414	0.00119226	0.00121914	0.0012355	0.00126783	0.00130201	0.00133516	0.00137168	0.00141039	0.00146197	0.0015173	0.00157766	0.00163968	0.00169945	0.0017623	0.00183032	0.00190668	0.00196609	0.00206121	0.00216832	0.00228267	0.00239916	0.00252057	0.0026413	0.00278659	0.00277085	0.00241096	0.00238134	0.00238608	0.00221181	0.00232758	0.00253341	0.00236615	0.00251797	0.00279694	0.00290096	0.00755659	0.00758989	0.0120342	0.0121323
Rest of world	Other	million	1.29521e-07	1.34865e-07	1.40216e-07	1.45855e-07	1.51341e-07	1.57167e-07	1.61747e-07	1.67473e-07	1.72294e-07	1.77694e-07	1.82745e-07	1.84748e-07	1.86482e-07	1.88273e-07	1.90881e-07	1.9163e-07	1.95341e-07	1.99327e-07	2.02451e-07	2.09465e-07	2.20823e-07	2.30484e-07	2.47171e-07	2.63102e-07	2.8162e-07	2.99577e-07	3.19845e-07	3.3949e-07	3.68727e-07	4.01558e-07	4.30601e-07	6.00573e-07	7.89043e-07	1.36089e-06	6.55354e-06	8.53015e-06	1.47103e-05	2.24291e-05	2.54319e-05	3.16102e-05	4.33346e-05	5.89568e-05	8.0824e-05	9.40388e-05	0.000106543	0.000115234	0.00010588
[truncated: 4 more columns]

## Sheet: Fig4
Vehicle type	Fuel type	Unit	1970	1971	1972	1973	1974	1975	1976	1977	1978	1979	1980	1981	1982	1983	1984	1985	1986	1987	1988	1989	1990	1991	1992	1993	1994	1995	1996	1997	1998	1999	2000	2001	2002	2003	2004	2005	2006	2007	2008	2009	2010	2011	2012	2013	2014	2015	2016
PLDVs	Gasoline	Mt	1067.15	1127.46	1210.08	1274.7	1256.53	1305.77	1363.97	1399.53	1456.69	1435.5	1411.1	1412.06	1412.42	1409.56	1406.58	1395.68	1433.04	1473.37	1515.15	1540.3	1583.92	1568.46	1573.87	1572.04	1596.44	1630.14	1671.6	1701.42	1740.16	1753.94	1751.78	1763.76	1799.39	1801.59	1833.03	1827.76	1831.37	1838.98	1818.8	1818.25	1843.86	1819.67	1833.85	1878.04	1886.48	1928.29	1983.45
CLDVs	Gasoline	Mt	158.732	170.873	186.973	206.517	211.635	226.844	248.079	267.489	289.286	293.581	284.238	283.786	286.492	294.489	303.571	315.307	333.671	352.247	372.85	385.098	399.907	430.703	457.579	476.199	486.514	502.128	513.557	521.587	531.344	546.055	549.425	557.348	570.965	574.326	593.082	605.223	620.371	631.47	620.231	613.686	665.866	657.821	669.362	688.02	701.141	728.067	750.847
Buses	Gasoline	Mt	15.884	12.8241	11.8508	11.8786	11.7197	11.8611	11.9887	11.8947	11.8852	11.6367	11.4673	11.0714	11.0141	11.3093	11.7859	12.9465	13.7742	14.3458	15.309	15.9524	15.9881	17.0731	19.1731	21.3703	20.8413	22.8894	25.0632	25.9824	25.7064	25.7952	25.9774	25.9195	26.8678	26.2925	26.7081	25.1293	23.0144	21.8859	22.0706	23.2111	20.7392	22.1056	22.8435	22.7005	21.2697	22.498	20.6279
Trucks	Gasoline	Mt	107.011	108.107	108.053	113.176	112.595	114.013	113.291	110.519	111.509	110.2	108.644	108.722	106.234	106.484	104.844	102.895	101.313	101.666	100.389	99.308	99.1248	101.018	100.988	102.232	99.509	98.0914	97.3525	94.6785	93.1384	91.9675	90.9603	88.8899	86.5158	87.7877	86.0306	81.9261	82.5333	77.3884	76.1462	71.5301	70.783	70.2527	70.5542	68.5889	68.4774	69.0919	69.4739
PLDVs	Diesel	Mt	78.4328	86.024	95.2058	108.736	112.164	116.182	132.73	146.451	163.13	174.358	176.572	183.764	191.551	206.915	220.305	229.805	244.628	261.267	282.682	300.976	329.664	341.668	353.027	359.994	374.491	385.492	405.106	420.912	443.336	460.447	479.119	515.335	542.924	558.446	598.519	593.799	623.013	649.494	678.008	661.142	665.248	710.641	728.171	748.641	771.562	801.458	827.726
CLDVs	Diesel	Mt	10.9519	11.9215	13.044	14.1683	15.0193	15.9091	17.7829	19.2801	21.8895	22.8134	24.3198	25.7556	26.8536	28.8362	30.6434	32.2702	34.3847	37.358	41.0457	44.2913	48.8889	52.0585	55.6103	59.0347	61.4748	65.3309	70.0199	72.7401	75.7631	80.1022	83.8863	87.8142	97.1427	108.179	128.845	140.589	157.856	173.843	191.066	194.267	206.583	218.68	234.979	247.054	252.595	263.311	269.039
Buses	Diesel	Mt	93.5667	99.2601	105.699	112.233	115.3	121.117	131.934	140.703	150.736	159.958	166.943	172.161	169.933	179.247	188.682	198.88	212.97	229.866	246.449	260.433	283.581	292.526	301.972	315.999	325.356	340.588	361.042	365.768	363.058	378.884	396.18	403.923	419.737	430.565	440.649	475.53	457.443	484.853	455.361	436.375	460.981	437.775	449.239	451.936	449.87	449.846	428.4
Trucks	Diesel	Mt	189.27	203.647	219.279	239.352	242.227	247.633	267.016	287.77	312.355	335.589	336.349	346.401	339.436	365.594	382.674	402.426	418.454	434.766	471.574	490.823	517.277	525.888	541.127	570.307	587.393	612.423	647.047	673.799	696.545	738.368	763.524	758.447	774.446	826.533	876.689	899.871	944.495	983.008	1001.45	997.055	1061.01	1105.93	1114.42	1138.93	1135.5	1168.04	1159.35
PLDVs	Other	Mt	5.67769	6.89999	7.64861	7.98072	8.48702	9.10591	10.1709	10.4784	10.1815	9.44431	10.3732	10.7346	12.1379	14.7105	16.3676	16.1925	17.1134	18.451	19.286	19.9752	18.4078	18.0671	19.062	19.0922	20.2238	21.315	22.246	24.0907	25.1269	26.7029	30.2701	34.9839	34.4718	34.5744	35.2092	36.4772	38.0433	40.5285	41.809	42.7512	41.5112	43.4127	43.5896	46.3634	46.4784	48.6621	50.4974
CLDVs	Other	Mt	2.11901	2.17762	1.61554	1.67807	1.63948	1.86765	1.99854	2.0287	1.96947	1.85166	2.1803	2.22906	2.73714	3.56763	3.96904	3.88037	4.01042	4.05279	4.14429	4.08094	3.82266	3.71789	3.87353	3.89709	4.04415	4.11862	4.21931	4.63597	4.90287	5.301	6.43762	7.13222	6.61582	6.76236	7.07206	7.42665	8.071	8.49066	8.77886	8.88535	8.69858	9.50422	9.503	10.3225	10.3692	10.8199	10.5534
Buses	Other	Mt	0.326271	0.37715	0.416196	0.407236	0.429762	0.411335	0.432345	0.447062	0.459728	0.487624	0.493894	0.557938	0.735019	0.857133	1.13263	1.41101	1.65989	1.95747	2.12916	2.3949	0.942052	0.829138	1.14722	1.09188	1.25217	1.18024	1.35702	1.69145	1.97042	2.33446	3.8283	4.92282	9.23172	13.439	16.1288	22.1618	25.5764	31.3234	39.8279	46.7631	52.593	54.6359	57.0183	58.6005	61.9887	62.8029	62.6593
Trucks	Other	Mt	0.820031	1.48423	1.75497	1.8464	1.95869	1.90609	1.9693	1.95744	1.91136	1.71118	1.84605	2.00235	2.3674	3.00914	4.9461	4.57621	3.93482	4.32116	4.63632	5.00166	3.2184	2.78955	3.69391	3.39346	3.84275	3.40784	3.39165	3.52113	3.722	4.37196	5.51181	4.31841	4.61383	6.04427	5.88489	6.25957	7.35112	6.96908	11.8015	14.9341	17.5347	22.6396	24.2666	28.4053	34.2509	36.5589	38.6844
MCs	Gasoline	Mt	17.5885	18.9598	20.567	23.4635	23.2204	26.4197	29.1025	31.2239	33.5275	35.4168	36.09	36.6791	37.7328	39.5703	41.3602	42.7662	44.7635	48.0992	51.5084	55.6119	56.7141	61.0725	65.1667	66.9768	69.8422	75.6329	80.8089	87.5442	88.4692	95.3507	95.1759	102.155	110.164	117.332	125.575	132.134	136.924	146.648	160.291	171.04	178.557	190.857	204.209	222.298	229.602	256.418	255.366
MCs	Diesel	Mt	0	0	0	0	0	0	0	0	0	0	0	0	0	0	0	0	0	0	0	0	0	0	0	0	0	0	0	0	0	0	0	0	0	0	0	0	0	0	0	0	0	0	0	0	0	0	0
MCs	Other	Mt	0.00358156	0.00298463	0.0023877	0.00179078	0.00119385	0.0023877	0.00119385	0.00298463	0.00477541	0.00596926	0.0101477	0.0274586	0.0310402	0.0310402	0.0316371	0.032234	0.032234	0.0220863	0.0250709	0.0286524	0.0447694	0.0447694	0.040591	0.048351	0.0429787	0.0519326	0.0489479	0.0513356	0.060588	0.0799881	0.10685	0.112222	0.158962	0.220263	0.327653	0.358726	0.406547	0.476655	0.541325	0.624827	0.654902	0.784662	0.730912	0.847762	0.866721	0.873451	0.894745
[truncated: 4 more columns]

## Sheet: Fig5
Country code	Region	Unit	gasoline PLDVs	diesel trucks
ABW	Latin Am. + Canada	Mt	0.0515086	0.00583949
AFG	Rest of Asia	Mt	0.746543	0.388762
AGO	Middle East + Africa	Mt	0.273673	1.18992
AIA	Latin Am. + Canada	Mt	0.00130841	0.00159293
ALB	Rest of Europe	Mt	0.246072	0.843076
ARE	Middle East + Africa	Mt	14.1612	2.32229
ARG	Latin Am. + Canada	Mt	11.4211	4.01619
ARM	Rest of Europe	Mt	0.460687	0.0190582
ASM	Rest of world	Mt	0	0
ATG	Latin Am. + Canada	Mt	0.0219746	0.0031802
AUS	Rest of world	Mt	26.9971	11.993
AUT	EU-28	Mt	4.05021	2.21433
AZE	Rest of Europe	Mt	3.57219	1.18895
BDI	Middle East + Africa	Mt	0.0494018	1.21522e-09
BEL	EU-28	Mt	3.56879	2.98291
BEN	Middle East + Africa	Mt	0.175875	1.192
BFA	Middle East + Africa	Mt	0.134283	0.9774
BGD	Rest of Asia	Mt	0.521915	2.10677
BGR	EU-28	Mt	1.18155	3.9529
BHR	Middle East + Africa	Mt	2.28487	0.326079
BHS	Latin Am. + Canada	Mt	0.0721593	0.0303468
BIH	Rest of Europe	Mt	0.455194	0.789626
BLR	Rest of Europe	Mt	3.41828	0.431207
BLZ	Latin Am. + Canada	Mt	0.0293066	0.00177101
BMU	Latin Am. + Canada	Mt	0.0819305	0
BOL	Latin Am. + Canada	Mt	2.57098	1.50454
BRA	Latin Am. + Canada	Mt	45.3387	3.59746
BRB	Latin Am. + Canada	Mt	1.3484e-14	0.0174383
BRN	Rest of Asia	Mt	0.806255	0.0169553
BTN	Rest of Asia	Mt	0.0905573	0.0492605
BWA	Middle East + Africa	Mt	0.8938	0.291491
Bonaire, Sint Eustatius and Saba	Rest of world	Mt	0.00344789	0.00290326
CAF	Middle East + Africa	Mt	0.025163	0.0256312
CAN	Latin Am. + Canada	Mt	83.5452	22.5
CHE	Rest of Europe	Mt	5.50263	0.589683
CHL	Latin Am. + Canada	Mt	7.3319	3.89855
CHN	China	Mt	318.929	206.767
CIV	Middle East + Africa	Mt	3.56837e-05	1.58251
CMR	Middle East + Africa	Mt	0.533712	0.872743
COD	Middle East + Africa	Mt	0.167166	0.197503
COG	Middle East + Africa	Mt	0.233047	0.286509
COL	Latin Am. + Canada	Mt	6.38195	4.14413
COM	Middle East + Africa	Mt	0.0381338	0.00292197
CPV	Middle East + Africa	Mt	0.041992	0.0300129
CRI	Latin Am. + Canada	Mt	1.98727	0.593958
CUB	Latin Am. + Canada	Mt	0.491575	0.433374
CUW	Latin Am. + Canada	Mt	0.152293	0.462947
CYM	Latin Am. + Canada	Mt	0.0690065	0.0289406
CYP	EU-28	Mt	0.708872	0.169014
CZE	EU-28	Mt	3.82272	4.85023
Cook Islands	Rest of world	Mt	0.00722492	0.00764712
DEU	EU-28	Mt	46.4675	14.7953
DJI	Middle East + Africa	Mt	0.0348504	0.00601378
DMA	Latin Am. + Canada	Mt	0.00792865	0.0020722
DNK	EU-28	Mt	3.18586	1.04001
DOM	Latin Am. + Canada	Mt	0.866749	0.181789
DZA	Middle East + Africa	Mt	8.00416	11.5434
ECU	Latin Am. + Canada	Mt	4.99705	3.84555
EGY	Middle East + Africa	Mt	14.5243	16.4546
ERI	Middle East + Africa	Mt	0.0245497	0.126784
ESH	Rest of world	Mt	0	0
ESP	EU-28	Mt	11.4689	4.7924
EST	EU-28	Mt	0.66452	0.52801
ETH	Middle East + Africa	Mt	0.416618	2.66517
FIN	EU-28	Mt	3.2108	2.13347
FJI	Rest of world	Mt	0.0967888	0.0627845
FRA	EU-28	Mt	17.4549	4.33957
FRO	Rest of Europe	Mt	0	0
FSM	Rest of world	Mt	0	0
Falkland Islands	Rest of world	Mt	0.00314766	1.78085e-101
GAB	Middle East + Africa	Mt	0.0587302	0.0055345
GBR	EU-28	Mt	28.0508	6.74831
GEO	Rest of Europe	Mt	1.56058	0.0679691
GHA	Middle East + Africa	Mt	2.35673	1.04645
GIB	Rest of Europe	Mt	0.0849297	0.0312012
GIN	Middle East + Africa	Mt	0.293424	0.170236
GLP	Rest of world	Mt	0.119853	0.00519221
GMB	Middle East + Africa	Mt	0.0275447	0.00413737
GNB	Middle East + Africa	Mt	0.0405191	0.000961258
GNQ	Middle East + Africa	Mt	0.000868495	0.0565848
GRC	EU-28	Mt	4.53896	3.18294
GRD	Latin Am. + Canada	Mt	0.0156201	0.000443694
GRL	Rest of Europe	Mt	0.00428489	0.00528701
GTM	Latin Am. + Canada	Mt	1.62112	1.10944
GUF	Rest of world	Mt	0.0355019	0.0349782
GUM	Rest of Asia	Mt	0	0
GUY	Latin Am. + Canada	Mt	0.40785	0.104327
HKG	China	Mt	0.482458	2.25479
HND	Latin Am. + Canada	Mt	0.637941	0.840501
HRV	EU-28	Mt	1.28024	1.15781
HTI	Latin Am. + Canada	Mt	0.538792	0.296775
HUN	EU-28	Mt	4.14206	3.16928
IDN	Rest of Asia	Mt	15.5358	11.1201
IND	India	Mt	27.3182	104.607
IRL	EU-28	Mt	1.91468	1.33125
IRN	Middle East + Africa	Mt	27.7672	13.3264
IRQ	Middle East + Africa	Mt	15.7802	2.11077
ISL	Rest of Europe	Mt	0.252192	0.11774
ISR	Middle East + Africa	Mt	6.73246	1.56073
ITA	EU-28	Mt	15.2611	11.5711
Isle of Man (under British governance)	Rest of world	Mt	0	0
JAM	Latin Am. + Canada	Mt	1.3114	0.0836345
JOR	Middle East + Africa	Mt	3.57045	1.30978
JPN	Rest of Asia	Mt	67.1483	38.7987
Jersey	Rest of world	Mt	0	0
KAZ	Rest of Asia	Mt	7.68086	0.42708
KEN	Middle East + Africa	Mt	1.38724	1.57884
KGZ	Rest of Asia	Mt	0.220839	0.0820263
KHM	Rest of Asia	Mt	0.113103	1.83978
KIR	Rest of Asia	Mt	0.00193703	3.59506e-05
KNA	Latin Am. + Canada	Mt	0.0134424	0.00171204
KOR	Rest of Asia	Mt	23.5258	9.28633
KWT	Middle East + Africa	Mt	7.04978	1.82517
LAO	Rest of Asia	Mt	0.0467243	1.10407
LBN	Middle East + Africa	Mt	5.58586	0.969511
LBR	Middle East + Africa	Mt	0.0894274	0.0104119
LBY	Middle East + Africa	Mt	1.03599	0.425058
LCA	Latin Am. + Canada	Mt	0.0247961	0.00739206
LIE	Rest of Europe	Mt	0	0
LKA	Rest of Asia	Mt	0.998602	2.43471
LSO	Middle East + Africa	Mt	0.0546247	0.0136305
LTU	EU-28	Mt	0.654872	1.29392
LUX	EU-28	Mt	0.804283	1.01779
LVA	EU-28	Mt	0.439067	0.682945
MAC	China	Mt	0.828792	0.375981
MAR	Middle East + Africa	Mt	1.59719	5.78531
MDA	Rest of Europe	Mt	0.469833	0.126962
MDG	Middle East + Africa	Mt	2.02795e-107	0
MDV	Rest of Asia	Mt	0.0685718	0.0916653
MEX	Latin Am. + Canada	Mt	73.6551	10.1386
MHL	Rest of world	Mt	0	0
MKD	Rest of Europe	Mt	0.288562	0.793896
MLI	Middle East + Africa	Mt	0.580644	0.449865
MLT	EU-28	Mt	0.194901	0.124971
MMR	Rest of Asia	Mt	0.789489	0.13664
MNE	Rest of Europe	Mt	0.101872	0.0608329
MNG	Rest of Asia	Mt	1.39793	0.120997
MOZ	Middle East + Africa	Mt	0.604624	0.793862
MRT	Middle East + Africa	Mt	0.102656	0.21258
MSR	Rest of world	Mt	0.00309344	1.91426e-09
MTQ	Rest of world	Mt	0.175524	3.44934e-07
MUS	Middle East + Africa	Mt	0.271061	0.185835
MWI	Middle East + Africa	Mt	0.125809	0.172005
MYS	Rest of Asia	Mt	22.8194	7.95244
MYT	Rest of world	Mt	0	0
NAM	Middle East + Africa	Mt	0.509634	0.19386
NCL	Rest of world	Mt	0.396317	3.66412e-06
NER	Middle East + Africa	Mt	0.308813	0.224463
NGA	Middle East + Africa	Mt	22.7972	2.24284
NIC	Latin Am. + Canada	Mt	0.298329	0.48352
NIU	Rest of world	Mt	0	0
NLD	EU-28	Mt	11.3755	3.357
NOR	Rest of Europe	Mt	1.8058	1.28936
NPL	Rest of Asia	Mt	0.252725	1.01025
NZL	Rest of world	Mt	5.59658	1.98387e-05
Nauru	Rest of world	Mt	0	0
Norfolk Island (under Australian governance)	Rest of world	Mt	0	0
Northern Mariana Islands	Rest of world	Mt	0	0
OMN	Middle East + Africa	Mt	6.159	1.03723
PAK	Rest of Asia	Mt	8.3037	5.46221
PAN	Latin Am. + Canada	Mt	1.99625	0.642011
PER	Latin Am. + Canada	Mt	2.73021	3.01566
PHL	Rest of Asia	Mt	3.34147	8.39718
PLW	Rest of world	Mt	0.00873353	0.000319318
PNG	Rest of world	Mt	0.813068	0.322679
POL	EU-28	Mt	12.1663	12.4159
PRI	Latin Am. + Canada	Mt	1.56996	0
PRK	Rest of Asia	Mt	0.392981	0.28623
PRT	EU-28	Mt	2.61503	2.74503
PRY	Latin Am. + Canada	Mt	0.893344	3.16555
PSE	Rest of Asia	Mt	0.577155	0.856673
PYF	Rest of world	Mt	0.187316	0.1192
Pitcairn	Rest of world	Mt	0	0
QAT	Middle East + Africa	Mt	3.65046	1.23578
REU	Rest of world	Mt	0.0247844	0.229293
ROU	EU-28	Mt	3.82572	5.26094
RUS	Rest of Europe	Mt	87.0298	19.4858
RWA	Middle East + Africa	Mt	0.0960518	0.105391
SAU	Middle East + Africa	Mt	55.124	13.2732
SDN	Middle East + Africa	Mt	2.13559	1.8992
SEN	Middle East + Africa	Mt	0.361652	0.577495
SGP	Rest of Asia	Mt	1.72919	1.33551
SHN	Middle East + Africa	Mt	0	0
SLB	Rest of world	Mt	0.0419203	0.0346784
SLE	Middle East + Africa	Mt	0.088462	0.00365738
SLV	Latin Am. + Canada	Mt	1.27548	0.513455
SOM	Middle East + Africa	Mt	0.362867	0.0834035
SPM	Rest of world	Mt	0.00492842	3.95689e-43
SRB	Rest of Europe	Mt	1.18113	1.59034
SSD	Middle East + Africa	Mt	0.0398934	0.122556
STP	Middle East + Africa	Mt	0.00426959	0.00217741
SUR	Latin Am. + Canada	Mt	0.310207	0
SVK	EU-28	Mt	1.45148	2.07869
SVN	EU-28	Mt	0.918199	0.987544
SWE	EU-28	Mt	5.25252	1.73368
SWZ	Middle East + Africa	Mt	0.045659	0.0188479
SYC	Middle East + Africa	Mt	0.0124042	0.0132771
SYR	Middle East + Africa	Mt	2.40254	0.233717
Sint Maarten	Rest of world	Mt	0.010767	0.00502059
TCA	Rest of world	Mt	0.0125037	0.00408002
TCD	Middle East + Africa	Mt	0.0282749	0.0523201
TGO	Middle East + Africa	Mt	0.113505	0.0861792
THA	Rest of Asia	Mt	8.58288	17.2627
TJK	Rest of Asia	Mt	0.425349	0.128633
TKM	Rest of Asia	Mt	3.53308	0.267574
TLS	Rest of Asia	Mt	0.013051	0.0275552
TON	Rest of world	Mt	0.018056	0.0087055
TTO	Latin Am. + Canada	Mt	0.667263	0.221533
TUN	Middle East + Africa	Mt	1.33637	0.99254
TUR	Middle East + Africa	Mt	4.34868	14.7186
TUV	Rest of world	Mt	0	0
TWN	China	Mt	7.76135	4.03757
TZA	Middle East + Africa	Mt	0.626943	0.966368
Tokelau	Rest of world	Mt	0	0
UGA	Middle East + Africa	Mt	0.170291	0.727543
UKR	Rest of Europe	Mt	3.97044	5.94969
URY	Latin Am. + Canada	Mt	0.77751	0.4041
USA	United States	Mt	449.976	302.945
UZB	Rest of Asia	Mt	1.64377	0.563676
VCT	Latin Am. + Canada	Mt	0.0113517	0.000372952
VEN	Latin Am. + Canada	Mt	7.62626	2.27154
VGB	Latin Am. + Canada	Mt	0.00344121	0.00220805
VIR	Rest of world	Mt	0	0
VNM	Rest of Asia	Mt	1.5971	3.2982
VUT	Rest of world	Mt	0.0337844	0.0202986
WLF	Rest of world	Mt	0	0
WSM	Rest of world	Mt	0.0236556	0.00993717
YEM	Middle East + Africa	Mt	1.88308	0.134823
ZAF	Middle East + Africa	Mt	13.2043	5.60242
ZMB	Middle East + Africa	Mt	0.688131	0.129369
ZWE	Middle East + Africa	Mt	0.565783	0.353338

## Sheet: Fig6FigS11
Region	Vehicle type	Fuel type	Unit	1970	1971	1972	1973	1974	1975	1976	1977	1978	1979	1980	1981	1982	1983	1984	1985	1986	1987	1988	1989	1990	1991	1992	1993	1994	1995	1996	1997	1998	1999	2000	2001	2002	2003	2004	2005	2006	2007	2008	2009	2010	2011	2012	2013	2014	2015
United States	PLDVs	Gasoline	Mt	626.385	649.249	686.429	706.847	685.248	696.312	724.472	734.863	749.458	700.512	659.815	660.147	661.625	662.005	648.932	637.525	644.557	660.927	670.219	662.894	639.885	605.859	606.481	601.459	615.924	627.819	635.855	639.414	661.699	670.624	673.263	676.506	691.661	689.07	692.672	689.715	673.436	660.121	619.335	606.265	594.42	544.159	528.263	534.991	528.892	533.742
United States	Buses	Gasoline	Mt	84.2418	92.6308	105.261	119.499	124.332	135.161	151.742	166.014	182.649	183.617	172.692	172.615	174.355	181.499	189.334	199.91	215.119	229.454	245.636	253.797	261.072	289.681	312.561	326.279	334.941	344.85	353.233	362.033	370.77	385.091	388.344	391.865	402.876	405.543	418.543	420.28	431.209	439.003	424.904	412.659	457.641	445.204	449.897	456.465	470.154	494.166
United States	CLDVs	Gasoline	Mt	0.940596	0.963427	1.00854	1.06217	1.10057	1.13473	1.1633	1.17863	1.19463	1.18022	1.14435	1.14874	1.14906	1.14374	1.11776	1.1064	1.10996	1.11048	1.09336	1.06929	1.03867	1.01317	1.02571	1.03017	1.0566	1.07657	1.08138	1.06801	1.09933	1.12065	1.1294	1.06257	1.03402	0.985661	1.01681	1.07914	1.00963	1.00616	1.5602	1.62629	1.7016	1.29184	1.3658	1.59415	1.53644	1.5636
United States	Trucks	Gasoline	Mt	22.8355	22.9963	23.9061	25.3447	26.0091	25.875	26.536	26.7652	26.8131	25.7274	23.5713	23.5592	22.3629	21.143	19.4986	21.322	19.8706	19.0959	19.8494	19.4093	18.5099	18.1563	17.5518	17.5177	19.5201	19.9194	20.6921	20.4594	20.9994	22.3727	22.6459	22.5609	22.4427	23.954	23.4383	22.8082	24.4877	23.0934	23.3697	22.8908	24.2783	21.8358	21.7351	22.8284	22.9859	23.3343
United States	PLDVs	Diesel	Mt	2.48738	2.92911	3.38365	3.84696	3.61392	3.63698	4.02505	4.46346	4.99906	5.35307	5.19295	5.36307	5.41765	6.41696	7.28949	6.7911	7.51597	8.1995	8.99433	9.36263	9.31513	8.60157	9.32138	9.89951	9.88246	10.3309	10.6021	11.386	12.0037	12.1246	12.502	12.8518	13.9767	14.9833	14.6814	14.0307	13.6067	14.2656	14.3781	12.8978	12.8179	12.7232	12.0022	14.3529	13.2351	14.7308
United States	Buses	Diesel	Mt	0.334525	0.417907	0.518868	0.650365	0.655714	0.705974	0.843053	1.00835	1.21831	1.40314	1.35914	1.40233	1.42769	1.75931	2.1268	2.1295	2.50844	2.84662	3.29644	3.5846	3.80056	4.1127	4.80394	5.37027	5.3741	5.6746	5.88974	6.44667	6.72602	6.96228	7.21123	7.44435	8.14109	8.81822	8.87114	8.54966	8.71254	9.4871	9.86433	8.77897	9.8684	10.4095	10.2217	12.2462	11.7653	13.6385
United States	CLDVs	Diesel	Mt	4.55313	5.29845	6.0602	7.0468	7.07547	7.22498	7.87856	8.72669	9.71358	10.994	10.9788	11.3763	11.4696	13.5146	15.3056	14.3668	15.7775	16.7939	17.8863	18.4101	18.4319	17.5345	19.2175	20.6691	20.666	21.5951	21.9797	23.1829	24.3102	24.6982	25.565	23.8069	23.7271	22.9755	22.1778	22.6979	21.857	21.9019	23.2899	20.728	20.3753	15.9023	15.9885	20.6827	18.5802	19.3622
United States	Trucks	Diesel	Mt	62.6853	71.7194	81.4618	95.3531	94.8224	93.427	101.916	112.38	123.635	135.906	128.242	132.309	126.585	141.674	151.41	157.009	160.173	163.768	184.143	189.504	186.271	178.193	186.483	199.315	216.509	226.588	238.504	251.847	263.339	279.615	290.695	296.783	305.037	334.394	333.363	345.394	352.881	360.411	339.046	304.019	320.205	327.214	304.388	319.471	311.236	328.194
United States	PLDVs	Other	Mt	1.34616	1.53754	1.91027	1.88037	2.03222	1.83687	1.82077	1.80124	1.42759	0.527182	0.88078	1.05684	1.41858	1.77172	2.46857	1.76114	1.52046	1.37128	1.3154	1.26254	0.682792	0.66483	0.616985	0.604513	0.6645	0.632887	0.651268	0.786468	0.77228	0.664314	0.985576	1.22525	0.886921	1.07912	1.10064	1.19677	1.12264	1.17073	1.14199	1.14681	1.11285	0.694809	0.584981	0.461021	0.317936	0.424083
United States	Buses	Other	Mt	0.181043	0.219367	0.292932	0.317894	0.368729	0.356555	0.381364	0.40692	0.347917	0.138184	0.230524	0.276343	0.373833	0.485744	0.720237	0.552245	0.50745	0.476069	0.482097	0.483378	0.278579	0.317878	0.317975	0.327935	0.361356	0.347633	0.361795	0.445294	0.432732	0.381468	0.568488	0.709723	0.51661	0.635102	0.665055	0.729254	0.718838	0.778579	0.783478	0.780588	0.856776	0.568459	0.498202	0.393352	0.282627	0.392638
United States	CLDVs	Other	Mt	0.00292873	0.00330565	0.00406642	0.00409386	0.00472894	0.00433701	0.00423592	0.00418566	0.00329695	0.00128685	0.00221323	0.0026645	0.0035695	0.00443489	0.00616049	0.00442824	0.00379353	0.00333816	0.00310904	0.00295065	0.00160578	0.0054619	0.00684489	0.0114728	0.0196357	0.029114	0.0314413	0.0461284	0.0525377	0.0580045	0.110133	0.15859	0.189304	0.250827	0.296131	0.353192	0.412754	0.409096	0.449134	0.550834	0.516112	0.465848	0.463105	0.411149	0.563102	0.621898
United States	Trucks	Other	Mt	0.269603	0.299181	0.365485	0.370395	0.42375	0.374987	0.366379	0.360409	0.280586	0.106366	0.172858	0.207202	0.263411	0.310857	0.407483	0.323583	0.257505	0.217658	0.214018	0.203082	0.108505	0.109375	0.0979907	0.0965339	0.11532	0.10974	0.115788	0.137292	0.133552	0.120483	0.179686	0.178304	0.169689	0.194395	0.188539	0.172426	0.154622	0.137707	0.142042	0.152019	0.165711	0.206021	0.303679	0.601588	0.933723	0.974275
EU-28	PLDVs	Gasoline	Mt	228.115	245.753	264.798	282.749	271.88	289.632	298.695	308.221	326.143	331.674	330.919	323.249	325.7	325.684	331.099	327.264	340.734	349.879	362.664	369.231	378.637	378.845	383.243	380.167	374.173	370.599	374.05	372.32	372.603	373.485	356.428	349.088	342.707	330.159	319.878	304.564	292.728	282.201	267.89	256.584	242.291	233.108	219.065	212.047	211.827	211.294
EU-28	Buses	Gasoline	Mt	10.4703	10.2531	10.3801	10.6807	9.96648	10.5299	10.8437	11.1052	11.7475	12.3985	12.597	12.4394	12.4975	12.5886	13.1474	13.4069	14.2268	15.0813	16.07	17.1809	18.1531	19.0448	20.5157	21.3409	22.3424	22.9269	23.5745	24.0465	24.6984	25.1351	24.9103	25.1861	25.6548	25.6609	25.3586	24.3123	23.9621	23.3458	21.1521	19.5344	17.2388	15.3223	13.1056	11.3517	10.1661	8.82169
EU-28	CLDVs	Gasoline	Mt	1.51615	1.3946	1.4114	1.41509	1.26509	1.24233	1.18346	1.18362	1.15135	1.07864	0.985613	0.935766	0.852828	0.858252	0.824101	0.757593	0.770413	0.713117	0.707849	0.742351	0.688139	0.669282	0.644942	0.632145	0.656921	0.624676	0.616981	0.608155	0.590229	0.604505	0.540639	0.484897	0.438514	0.412199	0.389505	0.36477	0.349984	0.333941	0.321105	0.267285	0.255042	0.233675	0.221538	0.190147	0.174013	0.175331
EU-28	Trucks	Gasoline	Mt	3.3252	3.34671	3.38723	3.4478	3.20717	3.44619	3.45948	3.47241	3.53965	3.51361	3.31559	3.28332	3.20849	3.18263	3.16357	3.09001	3.23296	3.29806	3.48678	3.56638	3.64781	3.76346	3.93765	3.95163	4.1196	4.05292	4.24424	4.32071	4.38518	4.50734	4.30027	4.07652	3.78018	3.5651	3.30442	3.03052	3.02993	2.79321	2.46521	2.1293	1.9858	1.69864	1.43601	1.30543	1.17915	1.07041
EU-28	PLDVs	Diesel	Mt	58.6426	63.0853	68.7413	76.6457	76.1636	78.2904	89.3204	96.791	104.223	110.38	110.762	111.716	115.096	120.179	126.35	133.634	144.238	153.841	168.894	180.841	189.908	195.325	203.095	209.273	215.472	221.449	231.573	239.176	254.23	265.19	275.032	286.186	299.716	312.347	331.216	336.854	348.636	356.708	347.528	340.683	343.561	346.869	340.094	342.98	349.819	358.829
EU-28	Buses	Diesel	Mt	4.59728	4.77833	5.04149	5.32675	5.33553	5.66809	6.70085	7.42397	8.05079	8.44295	8.76152	8.86286	9.28649	9.69576	10.121	10.8134	11.5926	12.4463	14.1601	15.4433	16.6175	17.4274	18.664	19.3994	20.5447	21.8983	23.8182	25.1075	27.6926	29.1652	31.3372	30.9533	35.1459	40.298	46.4151	50.9487	57.2076	63.4573	67.4067	67.7835	70.5348	73.5851	74.5869	76.6612	81.1913	85.3425
EU-28	CLDVs	Diesel	Mt	23.1597	23.7447	24.0936	24.7607	24.1272	24.3233	25.8696	26.9813	28.0586	28.7605	28.0473	27.0688	26.9217	27.7289	28.5747	29.4201	31.0576	32.4407	33.8049	34.7449	35.0195	34.7425	34.9685	34.8806	34.8543	34.7685	37.083	37.5404	39.4478	40.4209	40.7249	33.7574	34.4135	35.6099	35.5198	38.3782	36.4162	38.0253	37.018	35.8553	38.083	33.8133	32.8743	33.518	32.9714	33.9015
EU-28	Trucks	Diesel	Mt	25.8182	26.6801	27.6322	28.6786	27.4954	28.8301	32.346	34.6533	37.0087	38.4429	38.6703	38.8435	39.3337	40.9862	42.7081	44.9514	48.03	51.1473	55.6036	59.1974	62.4633	64.0404	67.3679	70.3009	73.119	75.5765	80.5266	84.0854	90.1233	95.2906	98.3621	113.663	111.28	114.355	118.454	119.338	126.545	130.079	131.346	123.99	125.283	125.31	118.428	117.828	118.558	121.87
EU-28	PLDVs	Other	Mt	1.65107	1.93328	2.19509	2.04046	2.45883	2.88888	3.473	3.96131	4.06627	4.32288	4.97578	5.54406	6.00958	6.29043	6.26597	6.10344	6.13215	6.51245	6.59616	6.77181	6.9244	6.72688	6.39577	6.67297	6.9683	7.56905	7.94327	8.60627	8.80067	8.65427	8.90877	9.58355	9.95594	10.2123	10.7517	11.0627	11.7138	11.8388	12.4451	13.1018	13.7026	14.0421	14.2811	15.0023	15.0943	15.6364
EU-28	Buses	Other	Mt	0.117377	0.138048	0.170397	0.17675	0.207523	0.247649	0.302075	0.37716	0.417339	0.468133	0.570866	0.635302	0.687208	0.713435	0.703424	0.688184	0.680555	0.710639	0.724017	0.747684	0.786477	0.771167	0.733818	0.785403	0.823032	0.921718	0.970999	1.04628	1.07456	1.07734	1.0955	1.10579	1.18409	1.28087	1.43384	1.48182	1.54452	1.58448	1.57192	1.63793	1.61033	1.73414	1.67053	1.79821	1.84082	1.91045
EU-28	CLDVs	Other	Mt	0.0457775	0.0407889	0.0353076	0.0342831	0.0233672	0.0210867	0.0143388	0.0161119	0.0171517	0.0190316	0.0248235	0.0409522	0.042233	0.0404627	0.0390483	0.0379967	0.0368641	0.0265652	0.029178	0.0326879	0.0485838	0.0482578	0.0440663	0.0565701	0.0508327	0.0584709	0.0563936	0.133744	0.138429	0.182092	0.35989	0.586493	0.73635	0.74928	0.751181	0.904091	0.828183	0.852127	0.779137	0.810624	0.865717	0.88584	0.887918	0.966763	1.01209	0.971633
EU-28	Trucks	Other	Mt	0.018156	0.0172611	0.0175944	0.0172263	0.0190437	0.0225856	0.0247398	0.0299488	0.0330979	0.0396264	0.0566637	0.0821479	0.0919744	0.0923799	0.0916334	0.0895377	0.0908329	0.0821404	0.0861792	0.0926639	0.104388	0.101887	0.0942685	0.103512	0.0971535	0.107495	0.107141	0.115134	0.126875	0.145	0.175735	0.173129	0.186307	0.22254	0.293932	0.298224	0.357476	0.39447	0.42135	0.572617	0.411418	0.526424	0.450187	0.548646	0.57678	0.50237
China	PLDVs	Gasoline	Mt	2.17973	2.28801	2.51939	2.89643	3.08359	3.38107	3.6273	3.91506	4.41054	4.90704	5.10251	5.238	5.72052	6.32518	7.06173	8.23142	9.24723	10.4851	12.4254	13.9969	15.2837	17.3391	20.5618	24.1951	25.3931	29.2628	34.1255	37.1824	39.937	42.2436	45.6215	46.2281	51.7493	60.4838	72.7157	77.835	91.5304	104.277	116.302	130.558	155.373	173.396	189.592	221.322	235.527	279.086
China	Buses	Gasoline	Mt	6.65866	6.77424	6.77587	6.8235	6.79725	6.78739	6.82597	6.93665	7.05418	7.16161	7.18844	6.91916	7.35945	8.04468	8.69826	9.68647	10.2099	11.1254	12.3408	12.8925	13.2346	15.4391	17.4433	19.9047	18.9912	19.8275	20.4036	20.172	20.2155	20.7116	20.7869	21.6568	21.4683	21.8632	24.4764	26.0288	25.9037	25.0403	24.8136	25.9792	28.0544	31.1416	33.57	37.7048	38.6041	41.1457
China	CLDVs	Gasoline	Mt	4.12422	3.88558	3.9037	3.93355	3.94691	4.00361	3.9735	3.86345	3.80827	3.73581	3.76596	3.57619	3.68756	3.96156	4.41967	5.71701	6.40772	6.80675	7.47342	7.67452	7.84131	9.21973	11.0238	13.4697	13.1441	15.162	17.529	18.3691	18.6082	18.5207	18.8522	19.4377	20.4147	19.9963	20.5409	18.8126	16.8726	14.5792	13.0563	10.7949	9.75679	9.48723	8.53635	8.46677	8.14683	8.48581
China	Trucks	Gasoline	Mt	13.2232	13.3749	13.2916	13.2069	13.1171	12.9892	12.9423	12.9721	12.9578	12.9548	12.8369	11.9916	12.6446	13.8861	14.9761	16.6622	17.4112	18.7759	20.4828	21.0014	21.211	24.2747	26.4742	28.6465	25.0878	24.5406	23.7619	22.0613	20.5963	19.6245	18.2493	17.2796	15.3317	14.4317	12.6863	10.4244	8.12292	6.01613	4.11925	2.15826	0.415821	0.454966	0.456025	0.463849	0.469791	0.491756
China	PLDVs	Diesel	Mt	0.375568	0.464352	0.587355	0.737307	0.811197	0.999743	1.25549	1.38334	1.61739	1.83451	2.06122	2.01946	2.01362	2.15381	2.28024	2.46004	2.70899	2.9173	3.16466	3.34293	3.52796	3.66655	4.26191	4.69688	4.84707	4.99617	4.92927	5.01618	5.61786	6.17635	5.88583	5.67338	6.12805	6.11183	6.18477	6.61318	7.04713	6.88148	6.82486	7.05623	7.39011	7.52355	7.56684	7.4399	7.50081	7.83493
China	Buses	Diesel	Mt	1.41937	1.45436	1.47328	1.48762	1.50337	1.52287	1.55088	1.58152	1.61207	1.70233	1.71493	1.72656	1.70529	1.80204	1.89864	2.09709	2.31751	2.55848	2.89247	3.11513	3.11997	3.61059	4.28258	5.40017	4.91771	5.67199	6.26404	6.79455	6.76761	8.38754	9.58323	10.4977	12.3048	16.0153	21.7865	27.1295	32.7309	37.5403	43.5041	46.6738	53.4751	58.05	68.7638	69.4152	68.1231	68.7821
China	CLDVs	Diesel	Mt	4.07907	3.87129	3.93983	4.00501	4.04513	4.1694	4.22585	4.1623	4.18289	4.54572	4.57887	4.68118	4.54782	4.68317	4.97742	6.03688	7.09648	7.54606	8.52529	8.98342	9.07783	10.3086	12.5185	16.1988	15.2581	18.6129	22.2211	25.0858	25.9531	31.4073	33.9911	35.2597	41.4087	47.9093	55.0124	57.6122	61.0846	62.1087	63.4938	52.9776	48.0218	46.0438	45.9788	41.0379	38.4158	38.5772
China	Trucks	Diesel	Mt	22.5614	22.8771	22.9618	22.9722	22.9644	23.0406	23.3253	23.5325	23.7947	25.1387	25.0201	24.8517	24.2526	25.2703	26.1834	28.3408	30.9375	33.4724	37.2436	39.3353	38.8841	44.4954	51.8712	62.9598	55.2379	61.1527	65.5238	69.5889	68.927	83.9997	88.6371	89.9905	96.3244	105.062	132.775	147.55	160.432	173.581	191.658	200.862	229.819	249.829	274.088	276.091	271.951	281.867
China	PLDVs	Other	Mt	0	0	0	0	0	0	0	0	0	0	0	0	0	0	0	0	0	0	0	0	0	0	0	0	0	0	0.0155876	0.0387706	0.0360157	0.0178985	0.0279204	0.0360506	0.0332534	0.0380792	0.055172	0.547957	0.653052	0.668393	0.725408	0.751137	0.660699	0.677925	0.656422	0.649386	0.655092	0.609573
China	Buses	Other	Mt	0	0	0	0	0	0	0	0	0	0	0	0	0	0	0	0	0	0	0	0	0	0	0	0	0	0	0.00138298	0.00367381	0.00361333	0.00191309	0.0031894	0.00438088	0.00419102	0.00503035	0.00780803	0.112702	0.134552	0.136626	0.150108	0.162007	0.150362	0.160306	0.158483	0.160647	0.157548	0.14118
China	CLDVs	Other	Mt	0	0	0	0	0	0	0	0	0	0	0	0	0	0	0	0	0.000976597	0.000966912	0.000971724	0.0126542	0	0	0.00204248	0.0596903	0.0718083	0.0876092	0.120558	0.0407244	0.0250496	0.0359452	0.37686	0.498092	0.974478	2.10026	1.61141	2.76737	3.18052	3.22194	6.40189	7.25557	6.65979	7.34638	7.78782	8.61435	10.3464	11.0208
China	Trucks	Other	Mt	0	0	0	0	0	0	0	0	0	0	0	0	0	0	0	0	0.00200803	0.00201772	0.00201291	0.026146	0	0	0.00392678	0.105933	0.118279	0.126941	0.152224	0.0479107	0.0287492	0.0410012	0.409804	0.543686	0.906884	1.90435	1.52575	2.28996	3.05308	3.16309	7.68164	10.4524	10.9709	16.053	17.9	21.7308	27.4279	31.1383
India	PLDVs	Gasoline	Mt	0.767345	0.792931	0.793827	0.761291	0.628136	0.695929	0.730765	0.788446	0.872303	0.891527	0.940483	1.01676	1.12841	1.27883	1.45577	1.64384	1.87473	2.18061	2.45827	2.92029	3.07971	3.22087	3.3612	3.71669	4.16084	4.87086	5.33977	5.77457	6.3366	7.00917	8.07253	8.5597	9.41213	9.54291	10.0323	10.4424	11.3337	12.554	13.6412	14.4324	15.7142	16.211	16.7631	17.4561	19.2617	22.4768
India	Buses	Gasoline	Mt	0.68789	0.718974	0.757971	0.714981	0.602354	0.591723	0.6076	0.638182	0.682036	0.671807	0.678789	0.705988	0.752002	0.816004	0.887863	0.955843	1.03668	1.14403	1.2208	1.37026	1.36402	1.34684	1.32639	1.38318	1.45917	1.60863	1.66055	1.69161	1.75052	1.82834	1.9915	2.10396	2.15836	2.16119	2.16959	2.22684	2.35924	2.57973	2.57851	3.01453	3.09137	3.07781	2.99066	3.06843	3.64809	4.07061
India	CLDVs	Gasoline	Mt	0.0454354	0.047641	0.0509549	0.0478445	0.0405419	0.0385016	0.0392824	0.0409413	0.0433168	0.0422077	0.0421042	0.0432856	0.0455355	0.0487549	0.0523059	0.0554664	0.0591924	0.0642059	0.0672692	0.0740572	0.0722491	0.0698869	0.0673775	0.0687246	0.0708443	0.0762376	0.0767503	0.076187	0.0765107	0.0777672	0.0823818	0.0798417	0.0801869	0.0686843	0.0723943	0.103672	0.105887	0.138477	0.152935	0.172298	0.22818	0.199947	0.219607	0.233282	0.332621	0.413995
India	Trucks	Gasoline	Mt	0.305876	0.317817	0.326208	0.310353	0.258657	0.270418	0.280906	0.299175	0.325509	0.326805	0.337643	0.358264	0.389791	0.432559	0.48175	0.531549	0.591613	0.670782	0.736266	0.850797	0.872312	0.886984	0.899681	0.966534	1.05073	1.1939	1.27011	1.33288	1.41333	1.51808	1.6986	1.76188	1.89648	1.89229	1.91831	1.95713	2.07038	2.16919	2.12664	2.27536	2.62894	2.51122	2.57566	2.63573	3.08558	3.39532
India	PLDVs	Diesel	Mt	0.269871	0.292085	0.304198	0.34044	0.425204	0.506257	0.539223	0.595941	0.672257	0.808177	0.89474	0.971014	0.67833	0.749327	0.838584	0.956293	1.08685	1.25377	1.44761	1.78751	1.92125	2.18544	2.47388	2.75965	3.12108	3.72381	4.21964	4.57543	4.95325	5.44813	5.63395	5.49803	6.18578	6.734	7.80197	7.20599	8.4123	10.8189	15.4759	16.507	17.1286	21.046	23.7316	24.4514	23.8189	27.6458
India	Buses	Diesel	Mt	0.241927	0.264842	0.290458	0.319731	0.407751	0.430452	0.448342	0.482365	0.525624	0.609	0.645774	0.674225	0.452056	0.478135	0.511445	0.556057	0.601	0.657775	0.718898	0.838735	0.85093	0.913863	0.97624	1.02701	1.09454	1.22981	1.31221	1.34034	1.36836	1.42114	1.3899	1.35141	1.41851	1.52505	1.68725	1.53668	1.75111	2.22319	2.92531	3.44787	3.36962	3.99577	4.23389	4.29806	4.51122	5.00673
India	CLDVs	Diesel	Mt	5.58863	6.13763	6.82907	7.48285	9.59826	9.7956	10.1376	10.8228	11.6754	13.3816	14.0093	14.4576	9.57346	9.99131	10.5378	11.2852	12.0016	12.911	13.8542	15.8538	15.7634	16.5847	17.3438	17.8466	18.5855	20.3843	21.2118	21.1125	20.9171	21.1409	20.1085	18.7573	19.1964	16.8326	18.0772	23.9841	22.1363	26.6446	27.3312	28.6261	31.8955	30.6661	33.4265	32.837	33.6578	34.7184
India	Trucks	Diesel	Mt	3.46349	3.76925	4.02465	4.46836	5.6373	6.33352	6.67353	7.28045	8.07669	9.53814	10.3421	11.0157	7.5441	8.1603	8.93465	9.95585	11.0426	12.4172	13.9591	16.7668	17.5206	19.3769	21.3194	23.1056	25.3757	29.3868	32.3144	34.0022	35.5696	37.9909	38.1677	37.4406	36.9603	38.8542	43.0005	41.2528	43.7223	52.7511	63.1211	69.6849	74.7906	82.4915	87.1087	86.5159	88.7654	95.1591
India	PLDVs	Other	Mt	0	0	0	0	0	0	0	0	0	0	0	0	0	0	0	0	0	0	0	0	0	0	0	0	0	0	0	0	0.00228123	0.00374832	0.00934378	0.0231053	0.0484724	0.0699631	0.171723	0.196545	0.312319	0.396522	0.478213	0.598726	0.63479	0.862382	0.804333	0.844684	0.761592	0.961883
India	Buses	Other	Mt	0	0	0	0	0	0	0	0	0	0	0	0	0	0	0	0	0	0	0	0	0	0	0	0	0	0	0	0	0.0006302	0.000977747	0.00230512	0.00567923	0.0111155	0.0158446	0.0371369	0.0419132	0.0650126	0.0814818	0.0903936	0.125057	0.124879	0.163731	0.143499	0.148478	0.144243	0.1742
India	CLDVs	Other	Mt	0	0	0	0	0	0	0	0	0	0	0	0	0	0	0	0	0	0	0	0	0	0	0	0	0	0	0	0	0.0101467	0.01532	0.0456644	0.141059	0.371473	0.537663	0.709359	1.05625	1.14909	1.42274	1.51136	2.04421	2.32845	2.91557	2.78617	2.93365	3.18031	3.47923
India	Trucks	Other	Mt	0	0	0	0	0	0	0	0	0	0	0	0	0	0	0	0	0	0	0	0	0	0	0	0	0	0	0	0	0.0238028	0.0379786	0.119569	0.260903	0.431887	0.560073	0.596462	0.490571	0.550024	0.54418	0.506796	0.668485	0.703895	0.806506	0.636141	0.602662	0.572864	0.298243
Latin Am. + Canada	PLDVs	Gasoline	Mt	103.531	111.456	120.621	132.339	136.345	140.34	147.188	152.797	164.335	176.358	181.38	185.668	179.663	169.585	168.169	166.695	171.356	173.826	178.58	187.806	190.774	194.39	199.058	204.378	210.378	214.632	225.479	232.387	239.151	235.771	234.347	234.766	238.18	241.736	248.804	249.419	256.745	265.216	270.821	271.352	282.298	290.413	299.946	297.786	296.769	297.975
Latin Am. + Canada	Buses	Gasoline	Mt	10.6184	11.9396	13.1151	14.3986	15.2338	15.6429	16.7656	17.8614	19.0959	20.141	20.7753	21.321	21.3261	20.9308	20.1025	20.0403	20.5797	20.9491	21.2061	20.3991	21.0311	21.9888	22.3835	23.8246	24.2947	25.4951	27.7328	26.7593	27.7987	27.9055	28.2954	29.8796	29.5394	28.4825	28.8673	32.8585	35.8189	38.9588	41.8614	43.2497	44.8346	48.2847	49.7791	52.7198	53.0624	52.0854
Latin Am. + Canada	CLDVs	Gasoline	Mt	5.78803	2.94021	1.85313	1.55535	1.4967	1.52449	1.46296	1.31105	1.18154	1.08351	0.981432	0.930784	0.850434	0.764329	0.743472	0.722042	0.723453	0.743459	0.758681	0.774692	0.763928	0.73342	0.727152	0.716394	0.705358	0.727759	0.734719	0.739801	0.749297	0.724931	0.694896	0.484313	0.48198	0.523703	0.512572	0.486428	0.539431	0.671445	0.657627	0.718777	1.01258	1.03151	1.14723	1.23524	1.49424	1.76666
Latin Am. + Canada	Trucks	Gasoline	Mt	26.0313	25.9458	27.6503	30.3062	30.9004	30.8061	29.951	26.5727	23.1391	20.5811	18.7361	17.6088	15.9712	14.2229	13.9068	13.5532	13.4715	13.7749	13.9861	13.9444	13.5194	13.0516	12.6483	12.2837	11.832	11.5672	11.4543	10.9805	10.931	10.525	10.1759	10.1167	9.72967	9.75367	9.31576	8.67191	8.99528	8.36301	8.47027	7.58293	8.68433	8.72158	9.231	9.48857	9.24227	9.11104
Latin Am. + Canada	PLDVs	Diesel	Mt	3.98095	4.84574	5.72848	8.22783	10.857	11.3823	14.648	16.8201	19.3308	21.3773	22.6291	22.6817	22.0137	21.9929	23.1464	24.0455	27.3267	29.0041	30.1601	31.7206	32.2253	33.8687	34.9727	37.0977	40.0573	43.348	46.2499	50.1323	53.5018	54.7887	56.9212	69.9857	75.9483	75.7726	82.6688	85.1196	89.2232	94.9726	110.313	92.9623	96.2855	108.294	113.944	118.874	120.986	126.994
Latin Am. + Canada	Buses	Diesel	Mt	0.671434	0.897173	1.04277	1.37824	1.93172	1.86685	2.17473	2.40977	2.71956	2.8589	2.96807	2.95921	2.98017	2.92593	2.98655	3.05577	3.41936	3.60688	3.68739	3.88044	4.02393	4.32976	4.46883	4.859	5.23647	5.75493	6.25891	6.85578	7.52683	7.67332	8.00416	8.56771	9.82503	10.5405	12.5573	13.5536	15.5341	17.7712	20.8002	18.4145	19.0069	21.2334	22.212	25.8671	26.4045	27.9087
Latin Am. + Canada	CLDVs	Diesel	Mt	17.905	19.6318	21.287	23.1059	23.2826	25.7991	28.65	29.6048	31.5257	32.9429	34.1734	33.7748	31.8223	31.3803	32.8439	33.7831	37.4122	39.4534	41.0163	42.3724	42.7517	43.6795	44.4745	46.601	50.1453	53.8419	56.3026	59.7846	61.6141	62.4956	64.0479	68.6844	72.7944	72.9838	75.4776	81.918	80.8423	88.5531	75.9535	67.703	75.4491	76.1696	75.3706	78.6698	77.4366	78.7062
Latin Am. + Canada	Trucks	Diesel	Mt	31.7854	31.9495	32.7926	33.564	34.0943	35.6617	37.5809	38.4296	40.0453	41.1948	42.3803	42.9275	41.4908	42.3551	43.6926	44.4646	45.9302	46.8969	48.6062	49.449	50.9929	53.3161	53.3244	56.3326	60.0282	60.2115	63.7473	66.8287	68.7322	68.5558	68.6632	52.6695	52.1632	54.1738	59.029	60.3489	63.1856	64.0038	65.9108	89.0486	92.1249	91.0365	92.3102	91.396	91.1333	84.0303
Latin Am. + Canada	PLDVs	Other	Mt	0	1.84072e-08	8.68446e-07	1.8087e-05	7.47127e-05	0.000751273	0.00207058	0.00508007	0.00865058	0.0493962	0.037284	0.0736894	0.155944	0.384584	0.834692	0.890628	1.05716	1.62251	1.9263	1.87798	2.18976	2.35854	2.82258	2.36893	2.41483	2.67472	2.63589	2.67514	2.85352	3.19345	3.51211	5.49105	6.13703	6.72099	7.05892	7.35719	6.7347	7.00763	7.05784	6.62635	6.52863	6.88403	6.57031	7.68725	7.50237	7.85289
Latin Am. + Canada	Buses	Other	Mt	0	0	0	0	0	0	0	0	0	0.000393474	0.000192613	0.000611041	0.00146326	0.0038875	0.00792157	0.00830105	0.012329	0.0239804	0.036316	0.0360401	0.052302	0.0716403	0.163408	0.182132	0.212264	0.239198	0.214573	0.247132	0.295268	0.330228	0.37922	0.466142	0.578012	0.76497	0.993752	1.17582	1.29796	1.34999	1.45904	1.47974	1.51604	1.67874	1.69077	1.75742	1.73461	1.82237
Latin Am. + Canada	CLDVs	Other	Mt	0	0.0206588	0.0252296	0.0295077	0.0278497	0.0283397	0.026641	0.0259664	0.021711	0.0187433	0.0194112	0.0162398	0.0234225	0.0465239	0.121406	0.151194	0.146052	0.157143	0.161487	0.168899	0.116595	0.150501	0.191379	0.232828	0.284041	0.297314	0.32333	0.408941	0.505796	0.582203	0.868072	1.35928	2.37698	3.45319	4.32836	5.6714	6.1713	6.86572	7.05308	6.87209	7.29758	7.30267	7.80286	8.46079	8.90587	9.03543
Latin Am. + Canada	Trucks	Other	Mt	0	0.540452	0.625419	0.695739	0.637648	0.615589	0.562245	0.533049	0.435241	0.370208	0.375884	0.312385	0.448927	0.89018	2.22742	2.59832	2.40047	2.01012	2.03938	2.15098	1.25261	1.50177	1.83282	1.99773	2.17053	2.23613	2.25129	2.3988	2.47231	3.00635	3.50086	1.98534	1.76256	1.99418	1.87379	1.41981	1.26152	0.92705	0.87193	0.713511	0.665316	0.562726	0.551197	0.566953	0.527903	0.344184
Middle East + Africa	PLDVs	Gasoline	Mt	20.3181	21.7726	24.0284	27.0522	28.6929	31.6975	35.7181	40.1919	44.7856	46.8918	50.8022	53.759	56.0874	62.4824	65.5938	68.0183	68.8947	71.7206	74.5781	77.207	82.6317	85.794	95.0457	102.533	108.146	115.395	119.778	124.818	129.94	133.846	138.438	143.39	152.907	156.55	165.173	171.207	180.229	181.4	191.958	200.281	205.728	215.092	228.084	237.25	240.305	244.753
Middle East + Africa	Buses	Gasoline	Mt	11.0252	11.8272	12.9091	14.1694	14.6855	15.9686	17.4162	19.0215	20.424	20.8233	22.3434	23.3026	24.8882	27.1108	28.7791	29.5137	30.5598	32.4304	33.4692	35.0834	36.3408	34.8967	35.832	36.4917	36.6376	37.7443	36.1656	34.6721	33.9985	32.9335	32.0471	32.7027	33.904	34.72	34.9997	40.8614	42.7602	42.0499	44.1168	46.5005	49.044	50.519	55.5606	59.304	59.0894	61.0662
Middle East + Africa	CLDVs	Gasoline	Mt	1.41415	1.48287	1.56116	1.72702	1.81309	1.85264	2.10196	2.27093	2.46778	2.54309	2.70778	2.75529	2.85232	3.08212	3.26501	3.30122	3.4349	3.63719	3.88422	4.23514	4.07045	3.93226	4.24961	4.00665	3.73643	3.70058	3.462	3.55297	3.0251	3.23195	3.20704	2.99114	3.02562	3.14749	3.30275	3.36967	3.23466	3.92523	4.79334	5.60091	7.67282	7.84061	9.25229	11.1458	14.5137	15.1503
Middle East + Africa	Trucks	Gasoline	Mt	0.671806	0.709369	0.795729	0.901641	0.981263	1.17031	1.30487	1.48913	1.59201	1.64767	1.69211	1.74091	1.90391	2.21859	2.42952	2.58525	2.77845	3.08267	3.2568	3.62263	3.82329	3.67213	3.99867	4.19012	4.15306	4.12092	4.01867	3.87362	3.83118	3.59119	3.50179	3.47452	3.69088	4.02429	3.9771	4.2915	4.65625	4.53302	5.14653	5.10429	5.29822	5.27862	5.62671	5.71165	5.8475	6.06672
Middle East + Africa	PLDVs	Diesel	Mt	7.41079	8.60054	10.0189	11.6062	12.3546	13.2105	13.8955	16.5698	21.4293	22.1675	19.6146	23.1971	26.475	32.8521	35.7802	34.8017	30.4556	31.8235	33.0132	32.7975	33.3744	33.8792	34.9407	35.6267	38.4687	36.9494	40.0982	42.0322	42.8793	45.2678	50.1471	53.1199	60.2214	62.6043	69.5218	62.5396	72.4267	83.5123	96.0049	101.728	102.855	116.562	130.404	134.703	139.817	144.233
Middle East + Africa	Buses	Diesel	Mt	2.51694	2.8793	3.38019	3.55456	3.74037	4.25935	4.59664	4.78691	5.97513	5.71978	6.28157	7.14263	7.65733	8.2868	8.58018	8.60129	8.14292	8.62712	8.81283	8.89165	9.09997	9.17573	9.41084	9.94855	10.4375	10.4001	11.1203	11.0084	10.5447	11.3119	11.5475	11.9896	13.5376	14.133	14.6809	16.7488	19.5205	21.0908	23.9076	25.5239	26.7002	28.9929	31.5451	33.7777	34.453	34.8945
Middle East + Africa	CLDVs	Diesel	Mt	10.0418	11.0343	12.4786	13.6153	14.8409	17.1576	19.9957	22.9027	25.5163	25.7969	29.3529	32.6762	36.9933	39.2759	40.6179	44.9737	46.0639	52.5484	57.1784	60.1927	63.4527	65.9925	70.5224	75.0781	77.7487	75.1611	79.5815	77.0466	73.3845	76.9152	79.5421	81.5237	81.514	80.7682	84.8514	96.7257	92.3792	100.553	91.4608	88.6627	98.1507	84.3808	89.1239	95.2394	98.61	97.2546
Middle East + Africa	Trucks	Diesel	Mt	7.91575	8.79075	9.80515	10.9151	11.5848	13.2971	15.0159	17.3377	20.899	20.9384	22.9869	26.114	29.8828	33.2464	33.4688	37.4211	36.5917	37.9128	39.5974	41.347	38.7375	39.7003	41.1314	43.4169	44.6933	45.8916	49.1923	48.8244	48.6006	52.1488	55.7423	58.2588	62.0915	66.663	69.5461	71.0605	77.2468	82.3628	89.3361	88.4458	91.9253	98.1421	105.722	109.58	113.883	116.132
Middle East + Africa	PLDVs	Other	Mt	0	0	0	0	0	0	0	0	0	0	0	0	0	0	0	0	0	0	0	0	0	0	0	0.00838502	0.0125508	0.0264737	0.201755	0.761073	1.13965	1.65474	2.76886	3.0634	2.6709	2.59482	2.8191	2.71216	3.14937	3.91523	4.05324	5.45091	5.49414	6.34776	6.77391	6.72178	6.67764	7.61928
Middle East + Africa	Buses	Other	Mt	0	0	0	0	0	0	0	0	0	0	0	0	0	0	0	0	0	0	0	0	0	0	0	0.00488318	0.00674999	0.0129584	0.0893363	0.317498	0.452923	0.60872	0.978613	1.06699	0.897617	0.875989	0.864413	0.811665	0.937414	1.14385	1.14388	1.34766	1.34893	1.52889	1.6	1.58553	1.60922	1.87931
Middle East + Africa	CLDVs	Other	Mt	0	0	0	0	0	0	0	0	0	0	0	0	0	0	0.00298463	0.00298463	0.00298463	0	0	0	0.0537233	0.056708	0.0955082	0.127772	0.114903	0.151585	0.288707	0.556345	0.680232	0.840778	1.12822	1.11579	1.63805	1.90936	2.40818	3.31431	3.71807	5.15734	6.89743	9.69944	12.5989	13.179	14.5914	14.3686	15.2612	15.5118
Middle East + Africa	Trucks	Other	Mt	0	0	0	0	0	0	0	0	0	0	0	0	0	0	0	0	0	0	0	0	0	0	0	0.0022223	0.00308876	0.005969	0.0438306	0.146745	0.206205	0.271321	0.429066	0.393993	0.347101	0.379581	0.398325	0.396068	0.493507	0.568162	0.720915	0.809598	1.00852	0.971922	0.953516	0.82045	0.78254	0.504563
Rest of Asia	PLDVs	Gasoline	Mt	26.2957	30.9555	39.7032	45.6034	48.587	53.2666	57.5004	60.5168	65.4316	69.4792	71.0995	71.8366	72.1388	72.6896	73.9871	75.0602	78.1092	81.5293	85.3142	92.5031	105.363	110.063	112.738	117.004	123.376	131.447	141.358	148.226	149.935	155.06	161.271	165.952	169.228	170.774	174.591	174.392	171.158	175.786	173.498	175.587	181.621	180.409	183.714	188.536	186.668	176.9
Rest of Asia	Buses	Gasoline	Mt	12.3291	12.7381	12.2825	13.0012	11.8369	12.5446	13.1464	14.3501	15.5229	16.3465	16.1473	15.938	15.8193	16.0961	16.5797	17.2858	18.4616	19.8878	21.3346	23.4431	25.479	26.0665	26.9823	28.1846	29.5694	31.4654	33.1764	34.4426	34.3718	35.1369	36.4049	37.1214	38.2508	38.6715	40.6982	40.946	40.3133	42.4791	42.4616	44.5487	47.4615	45.4202	45.8918	49.2289	48.6937	49.2868
Rest of Asia	CLDVs	Gasoline	Mt	1.61215	1.64759	1.57901	1.62583	1.54209	1.53295	1.52088	1.49163	1.47958	1.41647	1.30136	1.16789	1.08298	0.992783	0.929544	0.87867	0.87849	0.900874	0.96453	1.03365	1.14112	1.08494	1.09448	1.13059	1.16121	1.21472	1.26013	1.26656	1.25665	1.22008	1.18595	1.09883	1.11251	0.877998	0.591509	0.62639	0.609633	0.835462	1.06522	1.19905	1.60498	1.45987	1.52847	1.5113	1.82454	2.074
Rest of Asia	Trucks	Gasoline	Mt	31.9725	32.3869	29.2302	29.5719	27.8329	28.6064	27.5516	27.4308	28.1054	28.2381	27.9815	27.2825	26.5577	25.7399	25.3857	25.2157	25.5647	26.0481	26.8813	27.5649	29.2717	29.1997	28.7402	28.6691	28.0138	26.9462	26.2821	25.6533	25.2236	24.5956	25.335	24.4159	24.1656	24.6172	25.5428	25.0949	25.2797	24.7144	24.7047	23.8707	21.6261	20.723	20.2565	20.6529	20.2752	20.4136
Rest of Asia	PLDVs	Diesel	Mt	1.88103	2.01914	2.23148	2.42616	2.64482	2.83209	3.01241	3.30541	3.87555	4.98332	6.72875	8.19553	9.18414	11.2216	12.7227	14.2996	16.5764	19.102	22.0388	25.6597	34.2968	38.211	40.4068	42.8217	47.3761	51.3857	54.1881	55.1228	52.2993	53.5129	53.3269	61.3958	58.9524	56.4855	59.9141	54.1636	52.6114	50.0263	48.9446	47.7454	41.0794	49.2111	52.1188	53.1323	58.6734	60.7003
Rest of Asia	Buses	Diesel	Mt	0.279106	0.288563	0.299855	0.310222	0.314608	0.326208	0.351315	0.391173	0.522473	0.734406	1.06564	1.35402	1.56468	2.03072	2.43981	2.86183	3.40257	4.1026	4.91238	5.83076	7.50576	8.32717	8.93517	9.6137	10.7108	11.787	12.4164	12.2279	11.4144	11.4407	10.7729	12.8646	12.5204	12.4225	17.9425	17.1505	16.9046	16.6697	16.4853	17.0686	16.7367	15.155	16.3464	17.1955	17.9315	19.2111
Rest of Asia	CLDVs	Diesel	Mt	21.4408	22.3791	23.4217	23.9351	23.3373	23.7528	25.5389	27.1386	29.219	31.8784	32.8054	34.4217	33.7785	37.126	39.6641	41.4282	43.5507	47.8711	53.7602	58.9412	67.303	70.586	74.8255	81.5945	87.8416	97.9514	105.405	104.156	95.9825	101.494	109.953	119.888	124.521	131.075	126.056	131.345	120.255	124.702	114.764	117.642	124.537	126.542	132.931	126.561	127.934	126.085
Rest of Asia	Trucks	Diesel	Mt	24.5618	27.0028	29.1344	30.9671	31.9109	33.04	34.9268	37.4811	41.1719	45.1581	46.6353	46.9778	44.7771	47.0664	48.0435	49.7415	51.3486	54.3089	57.6861	59.7894	69.6481	72.7647	73.2136	77.7898	80.825	85.8505	90.112	90.6518	87.9575	89.1638	89.8201	75.2009	75.5887	76.0973	80.0183	76.4907	79.998	80.0674	78.1877	78.3455	82.905	90.0387	92.2738	97.0493	97.9979	98.4219
Rest of Asia	PLDVs	Other	Mt	2.31684	3.00077	3.03875	3.5508	3.40901	3.78622	4.20222	4.03236	3.9188	3.77091	3.65961	3.12091	3.47459	4.99277	5.07029	4.8821	4.9744	4.69203	4.7534	4.92752	5.66393	6.02821	6.31511	6.60027	6.96299	7.24032	7.46109	7.68463	7.77079	8.62705	10.311	11.4143	10.7118	10.0996	9.44718	9.05089	8.89632	8.86626	8.67507	8.29826	6.40862	7.20125	7.13633	8.22386	8.51956	8.58824
Rest of Asia	Buses	Other	Mt	1.76017	1.75344	1.07072	1.0958	0.968756	1.16954	1.21049	1.13544	1.08036	1.1013	1.19158	1.0805	1.40823	2.06749	2.18808	2.20657	2.28582	2.24587	2.25522	2.11944	2.18909	2.14018	2.10359	2.06217	2.05125	2.01992	2.00027	1.98918	2.03342	2.28291	2.81796	3.11391	2.78538	2.58444	2.46386	2.40831	2.52393	2.69121	2.90188	2.82564	2.46314	2.84077	2.92732	3.67903	3.78716	3.67844
Rest of Asia	CLDVs	Other	Mt	3.78524e-05	0.000377239	0.000491293	0.000593029	0.000811931	0.00190574	0.00167639	0.0291894	0.0194806	0.0637483	0.0739291	0.0984302	0.240454	0.313539	0.380032	0.363363	0.274172	0.214574	0.16781	0.173582	0.197506	0.261436	0.267349	0.251433	0.241893	0.317652	0.345604	0.313954	0.345834	0.391221	0.711151	0.814376	2.83505	4.33472	5.89152	7.8759	9.90576	12.3776	15.5945	18.5525	21.2373	21.3446	21.3927	21.1367	20.8363	20.1727
Rest of Asia	Trucks	Other	Mt	5.01098e-05	8.34838e-05	0.000139137	0.00013924	0.000139149	0.000222197	0.000305336	0.00276187	0.00213837	0.00720781	0.0092647	0.0139383	0.0382942	0.0561389	0.0784824	0.0863512	0.0728993	0.0614495	0.0436147	0.0412421	0.0478924	0.0723994	0.074499	0.0793148	0.0773308	0.115937	0.137273	0.135537	0.194963	0.217732	0.344262	0.373298	0.433709	0.41938	0.513236	0.611459	0.834968	0.950638	1.20533	1.38598	3.3867	3.30896	3.27267	3.35223	3.24398	2.61026
Rest of Europe	PLDVs	Gasoline	Mt	55.993	61.4343	66.9002	72.2148	77.4807	85.8017	91.3077	93.1607	95.6048	98.4638	103.699	102.294	99.5282	96.8514	95.1648	93.8138	98.177	100.492	103.7	105.798	137.532	141.704	120.545	104.271	98.8861	98.659	97.3021	102.362	101.139	95.7273	93.2586	99.5938	102.184	101.518	105.148	107.39	112.243	115.022	123.038	120.512	124.227	124.16	126.822	127.625	127.465	121.868
Rest of Europe	Buses	Gasoline	Mt	6.22935	6.58398	6.96151	7.28989	7.66725	8.2141	8.48255	8.30864	8.21535	8.2589	8.48415	8.09704	7.68451	7.28909	7.03982	6.88894	7.18633	7.45306	7.81425	8.20611	11.4686	12.1388	11.4369	10.5255	10.6032	10.9856	10.7595	11.2082	11.3659	10.9752	10.2403	10.7075	10.5795	10.4823	10.7085	10.5462	10.9564	10.7747	11.1076	10.8155	11.1149	11.3032	11.0809	10.6507	10.3223	9.94049
Rest of Europe	CLDVs	Gasoline	Mt	0.090272	0.0972042	0.103548	0.109112	0.112377	0.114448	0.1179	0.117784	0.117331	0.118485	0.122304	0.119792	0.116969	0.115507	0.115584	0.116337	0.124531	0.131716	0.140193	0.148447	0.189609	0.20047	0.206761	0.196217	0.199814	0.203866	0.205649	0.210654	0.213893	0.210233	0.200685	0.197125	0.193907	0.196347	0.196717	0.195593	0.199243	0.277627	0.326277	0.339901	0.416555	0.398465	0.413996	0.407667	0.42952	0.448983
Rest of Europe	Trucks	Gasoline	Mt	2.24079	2.40048	2.5755	2.73761	2.94416	3.22938	3.43216	3.44841	3.53678	3.60518	3.77151	3.63711	3.47215	3.33788	3.35529	3.20153	3.33094	3.4284	3.62206	3.63264	4.81949	5.05652	4.12924	3.68554	3.60716	3.76793	3.76992	4.23557	4.06068	3.5775	3.41755	3.63514	3.90059	3.99974	4.29435	4.1397	4.38874	4.23061	4.28126	3.98957	4.36714	4.01247	4.30265	4.28546	4.20254	3.96124
Rest of Europe	PLDVs	Diesel	Mt	3.01663	3.39225	3.75584	4.25059	4.64588	4.66706	5.32922	5.79795	6.24043	6.68112	7.93508	8.83546	9.87152	10.4668	10.8572	11.605	13.3737	13.5604	13.1793	13.3683	22.8299	23.4069	20.5332	14.2376	11.0914	8.41866	7.68353	7.33215	11.2885	10.9642	12.0896	12.8599	13.3548	14.8708	17.5733	17.6877	20.8003	21.5129	26.8128	29.34	29.9992	32.9498	32.1257	35.1239	38.611	39.471
Rest of Europe	Buses	Diesel	Mt	0.760366	0.811275	0.86181	0.995633	0.972416	0.94762	0.91835	0.970754	1.0191	1.06759	1.20553	1.29254	1.40715	1.46971	1.53598	1.66618	1.88877	1.97171	1.99264	2.09101	3.2388	3.54212	3.42543	2.73997	2.44894	2.16294	2.12407	2.09593	2.82323	2.8	3.03467	3.11629	3.10525	3.23617	3.62065	3.56836	3.95936	3.94056	4.31872	4.57669	4.53724	4.6195	4.25008	4.44284	4.70064	4.62373
Rest of Europe	CLDVs	Diesel	Mt	5.80492	6.1931	6.59502	7.23278	7.87356	7.60148	8.25276	8.81854	9.17914	9.82523	10.9253	11.5098	12.4712	13.1321	13.4451	14.628	16.9633	17.1264	17.1169	17.4425	28.2742	29.819	24.744	19.6549	16.6703	14.4946	13.238	13.7034	17.2012	15.9521	17.4944	17.362	16.9705	17.2617	18.1449	16.9982	16.8475	16.4697	15.8013	17.6551	18.29	18.1688	17.1925	16.9274	16.0816	15.4499
Rest of Europe	Trucks	Diesel	Mt	8.28911	8.73733	9.29791	10.2798	11.2644	11.2645	12.2412	13.1884	13.8606	14.9278	16.9408	17.8595	19.54	20.6642	21.2637	22.9345	26.5358	26.6736	26.1981	26.3973	43.451	45.1075	37.5211	28.069	22.4928	18.5506	17.3422	17.9157	23.0439	21.1724	22.5447	23.5144	23.221	25.1461	28.2651	25.6406	27.5597	26.1703	29.0615	29.5717	29.7852	28.0144	25.8806	27.7001	28.9563	28.9288
Rest of Europe	PLDVs	Other	Mt	0.363614	0.428392	0.504498	0.509044	0.586793	0.593051	0.672456	0.677519	0.758174	0.763225	0.767841	0.849047	0.930122	1.01075	1.33016	1.95442	2.73172	3.50301	3.87728	4.2408	1.93919	1.10835	1.2679	1.00782	1.06989	0.664884	0.580854	0.573829	0.569282	0.629573	0.449309	0.759932	0.820121	0.486652	0.586524	1.4082	1.70081	3.65281	4.3204	4.60273	4.35254	4.17813	4.3085	4.30581	4.44958	4.52503
Rest of Europe	Buses	Other	Mt	0.045699	0.0518797	0.0589003	0.0573254	0.0637716	0.0615871	0.067435	0.0656568	0.0710575	0.0692764	0.0676473	0.0728554	0.0781028	0.0835096	0.108346	0.158934	0.223242	0.289679	0.326904	0.367407	0.189362	0.0842373	0.119564	0.0918506	0.120799	0.0678396	0.0579216	0.0514262	0.0538339	0.0602447	0.0309092	0.0843391	0.0837616	0.019028	0.0229751	0.122476	0.144819	0.155584	0.125757	0.108958	0.10839	0.320737	0.308057	0.286332	0.285092	0.299507
Rest of Europe	CLDVs	Other	Mt	0.276877	0.311376	0.350149	0.337496	0.371763	0.354368	0.383988	0.369926	0.396083	0.382059	0.369246	0.393932	0.41893	0.445179	0.575398	0.843044	1.18604	1.54578	1.75715	1.99452	0.514603	0.28635	0.501421	0.301721	0.425182	0.187355	0.136932	0.117332	0.113171	0.112902	0.0615503	0.0411662	0.053963	0.0372104	0.0657587	0.140374	0.127094	0.932529	1.05249	0.876407	0.981191	1.0777	1.15913	1.55197	1.72313	1.78573
Rest of Europe	Trucks	Other	Mt	0.517746	0.612931	0.725111	0.734792	0.85046	0.863782	0.982988	0.993766	1.11563	1.12639	1.13621	1.25924	1.382	1.5038	1.97172	2.90196	4.0583	5.20184	5.74942	6.27486	1.4948	0.795	1.3179	0.734447	0.977172	0.403261	0.280848	0.235797	0.226744	0.229562	0.0530461	0.112717	0.112957	0.10579	0.256122	0.367694	0.393998	0.0665237	0.050657	0.0398202	0.0531249	0.0440961	0.0449595	0.0457156	0.0485734	0.0536033
Rest of world	PLDVs	Gasoline	Mt	3.56546	3.75539	4.28963	4.23929	4.58211	4.63793	4.72947	5.07962	5.64958	6.32407	7.34612	8.84801	10.8296	12.6642	15.1178	17.4305	20.0912	22.3328	25.2142	27.944	30.7291	31.2408	32.8336	34.318	36.007	37.4571	38.3096	38.9307	39.4201	40.1738	41.0748	39.6722	41.3622	41.7595	44.013	42.7952	41.9622	42.4006	42.3205	42.6769	42.1839	42.7277	41.5989	41.0246	39.7631	40.1945
Rest of world	Buses	Gasoline	Mt	16.4716	17.407	18.5303	19.9398	20.5134	21.4033	22.2495	23.2528	23.8944	24.1629	23.3318	22.4482	21.8098	20.1136	19.0015	17.6194	16.2913	14.7212	13.7581	12.7252	11.7633	10.1002	9.09768	8.26497	7.67578	7.22467	6.8514	6.56166	6.37431	6.33719	6.40416	6.12535	6.53372	6.74091	7.26086	7.16263	7.08782	7.23885	7.23492	7.38448	7.38599	7.54808	7.48542	7.52603	7.40113	7.48494
Rest of world	CLDVs	Gasoline	Mt	0.352954	0.364973	0.379412	0.40266	0.402367	0.417348	0.425443	0.436646	0.441381	0.438273	0.416388	0.393649	0.376416	0.34223	0.318449	0.291774	0.265502	0.237982	0.219455	0.200291	0.182667	0.149949	0.133221	0.119753	0.109973	0.102999	0.0966111	0.0910049	0.0872376	0.0843438	0.0842249	0.0830546	0.0863417	0.0840372	0.0850062	0.091075	0.0933371	0.118384	0.137553	0.170585	0.164523	0.162446	0.158252	0.186183	0.262176	0.293531
Rest of world	Trucks	Gasoline	Mt	6.40468	6.62863	6.88996	7.3494	7.34402	7.62011	7.83281	8.06869	8.15457	8.09502	7.70939	7.3007	6.9752	6.34804	5.91981	5.4147	4.92943	4.34166	4.07176	3.72942	3.44982	2.95643	2.60871	2.32142	2.12476	1.98227	1.85911	1.76111	1.69779	1.65558	1.6361	1.56871	1.57799	1.54975	1.55326	1.50783	1.50241	1.47545	1.46264	1.5289	1.49829	1.50378	1.40677	1.21687	1.18949	1.24758
Rest of world	PLDVs	Diesel	Mt	0.367899	0.395516	0.454605	0.654738	0.648052	0.656822	0.704931	0.723775	0.74245	0.772329	0.754488	0.784453	0.800693	0.882608	1.04077	1.21117	1.34658	1.56511	1.7901	2.09589	2.26466	2.52412	3.02166	3.58132	4.17456	4.88962	5.56279	6.13923	6.56175	6.97454	7.58097	7.76473	8.44049	8.53648	8.95636	9.58518	10.2492	10.7956	11.726	12.2224	14.1324	15.4631	16.1835	17.5837	19.1011	21.0195
Rest of world	Buses	Diesel	Mt	0.130935	0.129725	0.135296	0.145213	0.157843	0.181629	0.198781	0.22524	0.246462	0.275334	0.317608	0.341271	0.372769	0.387783	0.443055	0.489142	0.511555	0.54045	0.572539	0.615677	0.631505	0.619131	0.643221	0.676707	0.710141	0.751154	0.816101	0.863047	0.899436	0.940028	1.00556	1.0292	1.14416	1.19011	1.28394	1.40281	1.53522	1.66291	1.85375	1.99891	2.3541	2.63862	2.81942	3.15054	3.51458	3.90326
Rest of world	CLDVs	Diesel	Mt	0.993517	0.969682	0.994108	1.04818	1.11937	1.29277	1.38515	1.54576	1.66533	1.83248	2.07206	2.19451	2.35515	2.41496	2.7155	2.9585	3.04703	3.17522	3.30623	3.49179	3.50704	3.27832	3.35757	3.4751	3.58563	3.77802	4.01987	4.15566	4.2477	4.36009	4.75317	4.88325	5.19115	5.14852	5.33173	5.87128	5.62425	5.8949	6.24823	6.52557	6.17851	6.0886	6.35277	6.46324	6.18323	5.79154
Rest of world	Trucks	Diesel	Mt	2.18968	2.12121	2.1685	2.15327	2.45333	2.73872	2.99076	3.48648	3.86261	4.34442	5.13117	5.50242	6.02931	6.17136	6.96904	7.60737	7.86489	8.16879	8.53643	9.03649	9.30861	8.89434	8.89466	9.01751	9.11245	9.21439	9.7849	10.0546	10.2525	10.4311	10.8921	10.926	11.7798	11.7874	12.2386	12.7956	12.9242	13.5815	13.7794	13.0873	14.1711	13.8571	14.2178	13.3031	13.0174	13.4394
Rest of world	PLDVs	Other	Mt	2.64093e-07	1.20136e-06	7.87194e-06	2.13921e-05	9.61468e-05	0.000136315	0.000353883	0.000860421	0.00200362	0.010716	0.05195	0.090032	0.149123	0.260205	0.397923	0.600732	0.697543	0.749755	0.817434	0.894585	1.00776	1.18034	1.6436	1.82932	2.13079	2.50668	2.75627	2.96454	3.18238	3.25782	3.29724	3.38727	3.20734	3.2729	3.21831	2.94476	3.76029	3.01216	2.9117	2.17445	2.61632	2.52433	2.47367	2.46734	2.50029	2.44477
Rest of world	Buses	Other	Mt	0.0147212	0.014884	0.0225895	0.0303017	0.0307038	0.032322	0.0371739	0.0435234	0.052804	0.0743727	0.119496	0.163445	0.188301	0.213557	0.241037	0.266135	0.30102	0.306554	0.319732	0.326988	0.326853	0.332794	0.435181	0.442719	0.4687	0.509353	0.523033	0.535482	0.555889	0.557199	0.561438	0.575263	0.55505	0.581086	0.583219	0.542683	0.703952	0.568852	0.552409	0.417776	0.519735	0.508462	0.506138	0.513481	0.527854	0.521808
Rest of world	CLDVs	Other	Mt	0.000649725	0.000642689	0.000952453	0.00126164	0.00124115	0.00129813	0.00146499	0.00168332	0.00200481	0.00275541	0.00427175	0.00571986	0.0064095	0.00699247	0.00760235	0.0079958	0.0090064	0.00910579	0.0094596	0.00960615	0.00943558	0.0204228	0.0386073	0.0503923	0.0438774	0.051137	0.0540546	0.0742805	0.0992244	0.115995	0.166762	0.20797	0.0560699	0.0665027	0.0669295	0.0789416	0.0835973	0.0843244	0.0888978	0.101424	0.108045	0.118323	0.147178	0.156525	0.16029	0.203663
Rest of world	Trucks	Other	Mt	0.0144752	0.0143184	0.0212196	0.0281078	0.0276515	0.0289208	0.0326383	0.0375025	0.044665	0.0613874	0.0951699	0.127432	0.142797	0.155785	0.169372	0.178138	0.200653	0.202867	0.210749	0.214014	0.210214	0.209119	0.272495	0.273772	0.283876	0.30237	0.303265	0.303906	0.3088	0.302532	0.299776	0.297041	0.262736	0.263988	0.23874	0.213357	0.25192	0.217253	0.200858	0.139687	0.169105	0.15986	0.154234	0.136207	0.136606	0.133138
World	PLDVs	Gasoline	Mt	1067.15	1127.46	1210.08	1274.7	1256.53	1305.77	1363.97	1399.53	1456.69	1435.5	1411.1	1412.06	1412.42	1409.56	1406.58	1395.68	1433.04	1473.37	1515.15	1540.3	1583.92	1568.46	1573.87	1572.04	1596.44	1630.14	1671.6	1701.42	1740.16	1753.94	1751.78	1763.76	1799.39	1801.59	1833.03	1827.76	1831.37	1838.98	1818.8	1818.25	1843.86	1819.67	1833.85	1878.04	1886.48	1928.29
World	Buses	Gasoline	Mt	158.732	170.873	186.973	206.517	211.635	226.844	248.079	267.489	289.286	293.581	284.238	283.786	286.492	294.489	303.571	315.307	333.671	352.247	372.85	385.098	399.907	430.703	457.579	476.199	486.514	502.128	513.557	521.587	531.344	546.055	549.425	557.348	570.965	574.326	593.082	605.223	620.371	631.47	620.231	613.686	665.866	657.821	669.362	688.02	701.141	728.067
World	CLDVs	Gasoline	Mt	15.884	12.8241	11.8508	11.8786	11.7197	11.8611	11.9887	11.8947	11.8852	11.6367	11.4673	11.0714	11.0141	11.3093	11.7859	12.9465	13.7742	14.3458	15.309	15.9524	15.9881	17.0731	19.1731	21.3703	20.8413	22.8894	25.0632	25.9824	25.7064	25.7952	25.9774	25.9195	26.8678	26.2925	26.7081	25.1293	23.0144	21.8859	22.0706	20.89	22.8131	22.1056	22.8435	24.9705	28.7141	30.3722
World	Trucks	Gasoline	Mt	107.011	108.107	108.053	113.176	112.595	114.013	113.291	110.519	108.164	104.69	99.9521	96.7625	93.486	90.5116	89.1171	91.5762	91.1814	92.5165	96.3733	97.3219	99.1248	101.018	100.988	102.232	99.509	98.0914	97.3525	94.6785	93.1384	91.9675	90.9603	88.8899	86.5158	87.7877	86.0306	81.9261	82.5333	77.3884	76.1462	71.5301	70.783	66.7401	67.0265	68.5889	68.4774	69.0919
World	PLDVs	Diesel	Mt	78.4328	86.024	95.2058	108.736	112.164	116.182	132.73	146.451	163.13	174.358	176.572	183.764	191.551	206.915	220.305	229.805	244.628	261.267	282.682	300.976	329.664	341.668	353.027	359.994	374.491	385.492	405.106	420.912	443.336	460.447	479.119	515.335	542.924	558.446	598.519	593.799	623.013	649.494	678.008	661.142	665.248	710.641	728.171	748.641	771.562	801.458
World	Buses	Diesel	Mt	10.9519	11.9215	13.044	14.1683	15.0193	15.9091	17.7829	19.2801	21.8895	22.8134	24.3198	25.7556	26.8536	28.8362	30.6434	32.2702	34.3847	37.358	41.0457	44.2913	48.8889	52.0585	55.6103	59.0347	61.4748	65.3309	70.0199	72.7401	75.7631	80.1022	83.8863	87.8142	97.1427	108.179	128.845	140.589	157.856	173.843	191.066	194.267	206.583	218.68	234.979	247.054	252.595	263.311
World	CLDVs	Diesel	Mt	93.5667	99.2601	105.699	112.233	115.3	121.117	131.934	140.703	150.736	159.958	166.943	172.161	169.933	179.247	188.682	198.88	212.97	229.866	246.449	260.433	283.581	292.526	301.972	315.999	325.356	340.588	361.042	365.768	363.058	378.884	396.18	403.923	419.737	430.565	440.649	475.53	457.443	484.853	455.361	436.375	460.981	437.775	449.239	451.936	449.87	449.846
World	Trucks	Diesel	Mt	189.27	203.647	219.279	239.352	242.227	247.633	267.016	287.77	312.355	335.589	336.349	346.401	339.436	365.594	382.674	402.426	418.454	434.766	471.574	490.823	517.277	525.888	541.127	570.307	587.393	612.423	647.047	673.799	696.545	738.368	763.524	758.447	774.446	826.533	876.689	899.871	944.495	983.008	1001.45	997.055	1061.01	1105.93	1114.42	1138.93	1135.5	1168.04
World	PLDVs	Other	Mt	5.67769	6.89999	7.64861	7.98072	8.48702	9.10591	10.1709	10.4784	10.1815	9.44431	10.3732	10.7346	12.1379	14.7105	16.3676	16.1925	17.1134	18.451	19.286	19.9752	18.4078	18.0671	19.062	19.0922	20.2238	21.315	22.246	24.0907	25.1269	26.7029	30.2701	34.9839	34.4718	34.5744	35.2092	36.4772	38.0433	40.5285	41.809	42.7512	41.5112	43.4127	43.5896	46.3634	46.4784	48.6621
World	Buses	Other	Mt	2.11901	2.17762	1.61554	1.67807	1.63948	1.86765	1.99854	2.0287	1.96947	1.85166	2.1803	2.22906	2.73714	3.56763	3.96904	3.88037	4.01042	4.05279	4.14429	4.08094	3.82266	3.71789	3.87353	3.89709	4.04415	4.11862	4.21931	4.63597	4.90287	5.301	6.43762	7.13222	6.61582	6.76236	7.07206	7.42665	8.071	8.49066	8.77886	8.88535	8.69858	9.50422	9.503	10.3225	10.3692	10.8199
World	CLDVs	Other	Mt	0.326271	0.37715	0.416196	0.407236	0.429762	0.411335	0.432345	0.447062	0.459728	0.487624	0.493894	0.557938	0.735019	0.857133	1.13263	1.41101	1.65989	1.95747	2.12916	2.3949	0.942052	0.829138	1.14722	1.09188	1.25217	1.18024	1.35702	1.69145	1.97042	2.33446	3.8283	4.92282	9.23172	13.439	16.1288	22.1618	25.5764	31.3234	39.8279	46.7631	52.593	54.6359	57.0183	58.6005	61.9887	62.8029
World	Trucks	Other	Mt	0.820031	1.48423	1.75497	1.8464	1.95869	1.90609	1.9693	1.95744	1.91136	1.71118	1.84605	2.00235	2.3674	3.00914	4.9461	6.17789	7.08267	7.7781	8.34537	9.00299	3.2184	2.78955	3.69391	3.39346	3.84275	3.40784	3.39165	3.52113	3.722	4.37196	5.51181	4.31841	4.61383	6.04427	5.88489	6.25957	7.35112	6.96908	11.8015	14.9341	17.5347	22.6396	24.2666	28.4053	34.2509	36.5589
[truncated: 5 more columns]

## Sheet: Fig7
Year	Region	Vehicle type	Unit	>25	24-25	22-23	20-21	18-19	16-17	14-15	12-13	10-11	8-9	6-7	4-5	2-3	0-1
1970	United States	PLDVs + CLDVs	Mt	1.24188	1.82441	3.65984	7.02761	13.0352	23.0771	38.0455	55.8822	69.0831	81.3183	92.862	103.267	112.481	121.799
1980	United States	PLDVs + CLDVs	Mt	3.54629	3.51434	6.06706	10.4047	17.6734	29.1878	45.5489	64.0894	77.414	108.27	114.397	110.483	139.361	118.246
1990	United States	PLDVs + CLDVs	Mt	5.47183	4.98862	8.27144	13.9519	28.2493	42.8005	58.111	92.8052	87.6006	79.0692	104.803	132.604	133.786	126.947
2000	United States	PLDVs + CLDVs	Mt	9.70427	8.21171	15.7673	19.3595	24.879	47.6386	82.1229	103.57	108.697	104.575	126.532	134.335	139.938	157.544
2010	United States	PLDVs + CLDVs	Mt	9.85808	11.2924	17.264	24.1075	32.2206	54.038	76.3433	98.3801	122.441	130.839	135.908	141.163	126.595	96.266
2020	United States	PLDVs + CLDVs	Mt	12.947	10.7683	16.3278	26.282	37.3344	51.7228	69.941	77.7599	66.2334	88.4573	109.646	120.73	117.571	115.042
1970	EU-28	PLDVs + CLDVs	Mt	0	0	0.00266071	0.0599992	0.422971	1.37431	2.71687	4.01235	20.7987	49.4858	51.972	53.2393	53.931	64.975
1980	EU-28	PLDVs + CLDVs	Mt	0	0	0.00489125	0.498711	5.94662	14.7918	26.1075	36.2699	50.9281	69.2325	70.4285	55.7818	59.1329	74.1601
1990	EU-28	PLDVs + CLDVs	Mt	0.000796244	0.0261943	0.266223	2.37819	9.47515	20.3898	27.0768	39.43	57.6959	76.6682	83.2319	88.6276	93.9935	100.288
2000	EU-28	PLDVs + CLDVs	Mt	1.02679	0.634467	0.913206	2.39553	10.2574	23.1661	40.1101	57.1724	71.9621	82.0515	85.0261	88.3332	101.544	114.945
2010	EU-28	PLDVs + CLDVs	Mt	3.2893	1.2083	2.41529	5.45501	12.2247	23.236	36.1426	57.0085	74.5677	80.1898	89.55	102.153	103.63	94.8203
2020	EU-28	PLDVs + CLDVs	Mt	8.99985	2.37167	3.08484	5.51701	11.7333	23.0298	38.3244	51.1728	56.0173	61.6075	69.1884	88.1686	95.3513	91.694
1970	China	PLDVs + CLDVs	Mt	0	0	0	0	0	0	1.88532e-05	4.15329e-05	0.355331	0.708191	0.708505	2.00114	3.43305	3.00292
1980	China	PLDVs + CLDVs	Mt	0	0	0	0	0	0	0.682108	1.36475	0.827836	0.649104	0.937263	2.58612	3.44388	4.52877
1990	China	PLDVs + CLDVs	Mt	0	0	0	0	0	0	1.19522	2.96112	4.82921	3.784	4.04559	4.16296	4.5404	5.54172
2000	China	PLDVs + CLDVs	Mt	0	0	0	0	0	0	0.628881	2.05595	5.12241	7.95372	10.8867	12.4509	12.9515	13.8277
2010	China	PLDVs + CLDVs	Mt	0	0	0	0	0	0	2.94982	6.53255	12.5066	15.6101	26.7105	32.1346	38.427	79.2204
2020	China	PLDVs + CLDVs	Mt	0	0	0	0	0	0	6.85156	16.4154	44.3294	53.7895	66.6516	78.4215	86.0408	79.8574
1970	India	PLDVs + CLDVs	Mt	0	0	0	0	0	0	0	0	0.0906526	0.425835	0.442677	0.449367	0.451622	0.45224
1980	India	PLDVs + CLDVs	Mt	0	0	0	0.00224089	0.0462935	0.150416	0.296322	0.42868	0.517738	0.0657861	0.126034	0.681972	0.543746	0.686647
1990	India	PLDVs + CLDVs	Mt	0	0	0.000218731	0.0049324	0.00404937	0.0265548	0.247645	0.291417	0.447214	0.974648	1.00895	1.23848	1.67292	1.67521
2000	India	PLDVs + CLDVs	Mt	0	0	0.000152444	0.00485567	0.0659138	0.189417	0.472524	0.918363	1.10915	1.52315	2.18064	2.81282	3.63463	4.04401
2010	India	PLDVs + CLDVs	Mt	0	0	0.000547706	0.0123508	0.109082	0.517193	1.22189	2.27273	3.04987	4.08731	5.17072	6.59395	8.83524	8.23758
2020	India	PLDVs + CLDVs	Mt	0	0	0.00131615	0.0329769	0.2702	1.14722	2.78145	5.43524	6.03853	10.7564	6.96827	11.8419	11.9223	11.0382
1970	Latin Am. + Canada	PLDVs + CLDVs	Mt	0	0	0.00212515	0.0479222	0.337833	1.09768	2.16244	3.12835	10.9682	19.8335	20.4161	20.6729	20.7699	21.5976
1980	Latin Am. + Canada	PLDVs + CLDVs	Mt	0	0	0.00345236	2.41171	7.83377	12.8247	18.0284	22.2828	26.0072	28.6544	27.9006	21.1458	26.4897	38.6545
1990	Latin Am. + Canada	PLDVs + CLDVs	Mt	0	0.229852	1.15088	2.79584	5.497	8.63068	8.86923	14.911	24.2868	27.055	31.9527	41.2089	45.4674	40.3145
2000	Latin Am. + Canada	PLDVs + CLDVs	Mt	0.0462272	0.139256	1.2779	3.49593	5.88318	9.7826	16.5252	22.224	21.9035	25.1102	33.1201	45.5914	68.8789	77.1732
2010	Latin Am. + Canada	PLDVs + CLDVs	Mt	1.54737	1.54151	2.96522	4.48537	6.99193	13.8208	24.6265	44.5822	53.2918	47.5163	48.1615	62.2049	70.7124	67.4112
2020	Latin Am. + Canada	PLDVs + CLDVs	Mt	3.67072	4.29759	8.27614	14.3768	11.3985	16.5413	31.4494	43.6646	48.0275	50.8496	59.4851	59.4266	54.3287	50.3725
1970	Middle East + Africa	PLDVs + CLDVs	Mt	0	0.220776	0.433326	0.751139	1.29602	2.2012	3.30242	4.26564	4.91948	5.28888	5.46999	5.54803	5.57715	5.60714
1980	Middle East + Africa	PLDVs + CLDVs	Mt	0	0.531892	1.0434	1.79683	3.03211	5.00991	7.37853	9.44111	10.8909	11.7376	12.1329	13.3741	15.3395	15.3642
1990	Middle East + Africa	PLDVs + CLDVs	Mt	0	0.677395	1.33077	2.36266	4.25019	7.4884	12.3494	18.0447	20.9559	21.9258	18.9554	18.9323	20.2154	20.0012
2000	Middle East + Africa	PLDVs + CLDVs	Mt	0	0.672724	1.53784	2.8881	6.20364	12.2732	20.7953	26.7414	28.462	30.9685	24.03	24.938	25.6579	34.2001
2010	Middle East + Africa	PLDVs + CLDVs	Mt	0	0.929017	2.39226	4.58524	9.80977	13.2642	17.0928	20.4197	26.4909	39.237	51.6202	52.3084	69.8372	83.7156
2020	Middle East + Africa	PLDVs + CLDVs	Mt	0	1.59251	3.11513	5.21969	9.4579	17.5807	21.5493	38.5308	50.9607	56.0986	67.66	70.5723	62.9409	56.6206
1970	Rest of Asia	PLDVs + CLDVs	Mt	0	0	0.000686764	0.0154866	0.109174	0.354727	0.698816	1.01096	1.46946	2.61572	3.43806	4.2683	5.89475	31.3026
1980	Rest of Asia	PLDVs + CLDVs	Mt	0	0	0.000398928	0.0116977	0.102135	0.340386	0.715503	1.30393	7.9538	20.4837	18.6737	16.3283	19.0188	22.654
1990	Rest of Asia	PLDVs + CLDVs	Mt	0	0	0.000742938	0.341086	2.54985	4.62716	6.92787	11.0878	16.461	17.5124	23.2877	28.0827	34.0878	42.7256
2000	Rest of Asia	PLDVs + CLDVs	Mt	0	0	0.00156131	0.414493	1.79597	5.05218	10.1462	17.7308	28.1492	32.0472	35.1994	45.909	47.2137	50.947
2010	Rest of Asia	PLDVs + CLDVs	Mt	0	0	0.00139399	0.6037	2.59048	5.72051	11.8042	16.4888	22.1634	28.9931	38.6019	52.3135	56.5711	59.4058
2020	Rest of Asia	PLDVs + CLDVs	Mt	0	0	0.0018523	0.464	2.3419	6.14389	13.4472	20.064	25.6431	34.5259	46.1571	49.6554	56.5107	57.1741
1970	Rest of Europe	PLDVs + CLDVs	Mt	0	0	0.0019051	0.0429602	0.302853	0.984024	1.93854	2.80443	3.38704	3.70431	3.85082	3.90901	23.5168	23.549
1980	Rest of Europe	PLDVs + CLDVs	Mt	0	0	0.00320728	0.0723244	0.509858	1.65662	3.26357	18.7019	22.5871	11.6676	12.1291	18.0439	17.8576	17.6269
1990	Rest of Europe	PLDVs + CLDVs	Mt	0	0	0.0177583	0.400452	1.3778	4.47672	12.6737	17.9973	21.4119	27.6114	28.6171	28.075	21.4071	15.2865
2000	Rest of Europe	PLDVs + CLDVs	Mt	0	0	0.00988329	0.222487	1.99475	5.87816	11.3715	12.1203	9.89693	8.58293	8.92241	11.5055	21.1947	27.3707
2010	Rest of Europe	PLDVs + CLDVs	Mt	0	0	0.00771281	0.12542	0.80626	2.61969	6.4879	15.9228	24.382	22.9176	21.0464	20.9628	33.2212	26.2602
2020	Rest of Europe	PLDVs + CLDVs	Mt	0	0	0.00748791	0.217502	1.21661	3.69251	7.38693	16.824	15.2453	28.6935	28.6372	23.7024	25.3935	20.2029
1970	Rest of world	PLDVs + CLDVs	Mt	0	0	4.65344e-05	0.00104935	0.00739752	0.0240359	0.047351	0.0685014	1.76716	3.66048	3.80526	3.86277	3.88215	3.89097
1980	Rest of world	PLDVs + CLDVs	Mt	0	0	2.19162e-05	0.0226429	0.201483	0.654657	1.28968	1.86575	2.25454	3.04172	3.93557	3.67136	5.55552	9.84362
1990	Rest of world	PLDVs + CLDVs	Mt	0	0	0.000657053	0.0148187	0.18807	0.88985	1.23562	1.92359	2.69703	3.7278	5.15311	7.0482	9.52272	14.4978
2000	Rest of world	PLDVs + CLDVs	Mt	0	0	0.000563273	0.0140905	0.118886	0.496623	1.28409	2.49106	4.6312	7.04929	9.49859	11.8626	12.3187	10.1562
2010	Rest of world	PLDVs + CLDVs	Mt	0	0	0.00167148	0.0544509	0.537198	2.28423	5.45048	8.11455	7.98623	8.13115	9.55388	8.80156	9.30444	8.96793
2020	Rest of world	PLDVs + CLDVs	Mt	0	0	0.0050687	0.0853618	0.611264	2.21486	3.97165	6.0488	7.05085	8.81779	10.0432	10.8662	10.5699	8.44393
1970	United States	Buses + Trucks	Mt	0.102433	0.241843	0.697951	1.39072	2.39985	3.65889	5.04427	6.42936	7.72497	8.89155	9.93012	10.8652	11.7294	12.5526
1980	United States	Buses + Trucks	Mt	0.432053	0.821678	2.25775	4.19096	6.82572	9.91608	13.1228	16.1508	18.8271	18.0983	17.2548	15.8354	18.8945	13.4565
1990	United States	Buses + Trucks	Mt	0.818433	1.62648	4.55296	8.31655	11.411	14.1525	15.8731	21.5453	16.5359	16.3439	18.7047	30.0417	30.4911	29.5831
2000	United States	Buses + Trucks	Mt	1.11782	1.85785	5.19535	6.27095	8.98393	13.3153	25.3896	29.8135	31.4696	27.9041	38.9083	45.8361	52.2971	51.9654
2010	United States	Buses + Trucks	Mt	0.868366	1.49356	4.96863	8.23327	10.6644	19.3165	27.5263	36.0969	39.0933	35.9587	40.1033	61.768	45.7895	35.3624
2020	United States	Buses + Trucks	Mt	0.469745	1.40531	4.99596	8.72955	11.6534	17.2893	32.5609	27.54	23.3209	34.4388	42.6612	48.293	48.7688	42.6126
1970	EU-28	Buses + Trucks	Mt	0	0	0	0	0	0	0	0	3.95418	8.8742	9.87628	10.4855	10.7791	11.1023
1980	EU-28	Buses + Trucks	Mt	0	0	0	1.03306	2.49759	3.28632	4.31024	5.51637	6.93559	9.08065	9.98796	10.4861	11.3651	12.179
1990	EU-28	Buses + Trucks	Mt	2.05704	1.46251	1.84679	2.32702	3.36507	4.57232	5.46694	8.06181	10.1894	11.8571	13.854	15.059	15.9727	17.0924
2000	EU-28	Buses + Trucks	Mt	2.7692	1.59834	2.49994	3.1459	4.14685	5.86841	7.84568	10.0757	13.2912	17.5797	19.5237	20.5195	23.3917	28.9358
2010	EU-28	Buses + Trucks	Mt	2.84747	2.0617	2.66945	4.05685	6.13321	7.87715	9.83103	12.63	17.4334	17.0842	19.6991	23.1649	25.7439	14.734
2020	EU-28	Buses + Trucks	Mt	4.0626	2.86194	3.80728	5.3503	5.97167	7.94743	11.2696	15.2226	9.694	12.8833	14.2583	17.6811	16.5862	14.3342
1970	China	Buses + Trucks	Mt	0	0	0	0	0	0	0	0	3.92082	7.91414	8.01082	8.1075	8.20418	7.72837
1980	China	Buses + Trucks	Mt	0	0	0	0	0	0	0.480258	0.924241	2.99532	4.88742	7.26062	7.63655	9.98723	11.8757
1990	China	Buses + Trucks	Mt	0	0	0	0	0	0	0.777809	1.73852	6.94383	6.31753	10.1394	17.6239	17.9631	15.5696
2000	China	Buses + Trucks	Mt	0	0	0	0	0	0	1.90543	4.74772	13.9658	19.6845	28.8978	32.0534	25.2093	32.6185
2010	China	Buses + Trucks	Mt	0	0	0	0	0	0	6.70352	8.11059	33.1098	38.6795	53.3189	34.8358	45.6868	81.7795
2020	China	Buses + Trucks	Mt	0	0	0	0	0	0	4.04169	7.80652	54.7655	37.4889	32.5839	32.4061	56.7061	46.5427
1970	India	Buses + Trucks	Mt	0	0	0	0	0	0	0	0	0.778926	1.62243	1.67893	1.70876	1.7221	1.72686
1980	India	Buses + Trucks	Mt	0	0	0	0.689252	1.59919	1.91922	2.25145	2.55693	2.80119	0.749735	1.48562	2.97543	3.08699	4.34897
1990	India	Buses + Trucks	Mt	0.90948	0.705627	0.925612	1.15967	0.450361	0.670952	1.42038	2.09941	3.33479	3.61116	2.75971	4.40089	4.98286	6.54151
2000	India	Buses + Trucks	Mt	0.291933	0.18505	0.499757	0.937666	1.24351	0.941647	2.25585	3.02205	4.58932	8.37261	7.70352	7.93099	10.4183	11.9033
2010	India	Buses + Trucks	Mt	0.455205	0.515205	0.675825	1.12409	2.87067	2.86812	3.79895	5.90859	7.78835	9.49847	12.4114	21.712	20.4167	22.5099
2020	India	Buses + Trucks	Mt	0.639098	0.427136	0.560299	0.833407	1.55268	3.22639	8.10718	9.90501	13.0474	21.7142	15.4104	18.7848	22.5731	18.2639
1970	Latin Am. + Canada	Buses + Trucks	Mt	1.01884	0.790476	1.03691	1.27051	1.47418	1.63894	1.93665	2.62475	4.16131	9.07479	11.7805	13.5165	14.3706	14.7086
1980	Latin Am. + Canada	Buses + Trucks	Mt	1.36085	1.05582	1.38499	1.74076	2.06636	2.2973	2.7465	3.82148	5.87847	6.6172	8.79924	13.8184	15.4604	25.3656
1990	Latin Am. + Canada	Buses + Trucks	Mt	1.26146	0.978712	1.28383	1.5731	1.8681	2.21008	2.51903	3.64239	6.69313	9.31251	14.9345	14.1874	20.8989	26.062
2000	Latin Am. + Canada	Buses + Trucks	Mt	1.05056	0.829168	1.24424	1.75725	2.45161	2.81458	3.34392	4.77175	6.27294	11.5161	18.6583	24.885	34.3661	34.2375
2010	Latin Am. + Canada	Buses + Trucks	Mt	1.6802	1.37856	2.19652	2.55974	4.02635	5.45832	7.17511	10.6009	15.4208	18.0253	22.559	23.7903	28.5437	42.2395
2020	Latin Am. + Canada	Buses + Trucks	Mt	2.47723	2.36636	3.50418	4.92768	5.24089	5.19211	5.08739	7.50938	11.5412	15.6645	18.1243	21.6405	18.8277	19.7424
1970	Middle East + Africa	Buses + Trucks	Mt	0.534918	0.41502	0.544406	0.667052	0.773983	0.860486	0.931493	0.997369	1.18528	1.81084	2.05061	2.203	2.27768	2.18523
1980	Middle East + Africa	Buses + Trucks	Mt	1.71192	1.32821	1.74229	2.41231	3.0142	3.35108	3.69308	4.17637	4.52318	5.09186	2.98505	6.29077	6.51941	4.96208
1990	Middle East + Africa	Buses + Trucks	Mt	6.99761	5.42009	7.10985	7.62457	7.84163	6.08966	9.7973	11.7109	8.82254	5.86762	6.61758	7.0673	7.38816	7.57054
2000	Middle East + Africa	Buses + Trucks	Mt	6.6547	6.28961	8.25045	2.8349	3.37702	3.76068	4.22359	5.14769	6.6691	10.7015	13.0951	17.316	26.5182	26.7006
2010	Middle East + Africa	Buses + Trucks	Mt	1.43963	1.11906	1.50012	1.87314	3.43861	4.20812	7.55663	10.8445	11.3534	20.0475	24.3723	24.4001	43.643	60.2718
2020	Middle East + Africa	Buses + Trucks	Mt	2.05223	2.36724	3.72924	4.56937	10.4791	12.9104	13.5601	27.2471	20.8718	22.4039	21.0072	21.7619	40.4558	39.1261
1970	Rest of Asia	Buses + Trucks	Mt	0.589592	0.45744	0.60005	0.735231	0.853092	0.948436	1.08401	1.3551	3.37853	7.87125	10.6143	12.7634	15.7651	16.8675
1980	Rest of Asia	Buses + Trucks	Mt	0.714334	0.554221	0.727004	1.43515	3.14697	4.29536	5.48346	7.3936	8.70981	11.89	13.9493	13.7396	14.6364	15.8073
1990	Rest of Asia	Buses + Trucks	Mt	2.71538	2.60225	4.01475	5.09049	7.16177	8.54381	7.89126	8.40189	10.2216	12.3058	15.6728	19.2062	25.2679	32.3845
2000	Rest of Asia	Buses + Trucks	Mt	5.19154	3.44378	4.06602	4.88377	5.08574	5.82229	7.64128	11.8799	20.0451	24.9656	29.1057	31.8037	28.6839	44.847
2010	Rest of Asia	Buses + Trucks	Mt	2.68419	2.24147	4.28067	7.89826	8.54458	7.8267	8.27708	8.59514	19.0998	17.5864	24.0189	41.7531	47.8617	54.6722
2020	Rest of Asia	Buses + Trucks	Mt	4.00377	2.30361	2.25627	3.02291	4.53037	5.83404	10.2859	15.6809	21.1947	31.6954	35.4282	38.2139	39.5793	37.056
1970	Rest of Europe	Buses + Trucks	Mt	0	0	0	0	0	0	0	0	0.961188	2.36973	2.87774	3.20272	3.36242	3.42173
1980	Rest of Europe	Buses + Trucks	Mt	0	0	0	0.508435	1.13069	1.25706	1.41108	1.68147	2.14732	2.32202	3.87258	5.17866	5.85853	6.4048
1990	Rest of Europe	Buses + Trucks	Mt	1.82069	1.4126	1.85299	2.27043	1.10615	1.22978	1.97553	3.19941	5.71559	8.45678	11.4719	12.3115	13.0363	11.0611
2000	Rest of Europe	Buses + Trucks	Mt	0.532884	0.469691	0.666934	0.929893	1.07896	1.42957	1.63994	2.34679	3.23883	3.78588	4.81784	5.6773	7.86461	9.32924
2010	Rest of Europe	Buses + Trucks	Mt	0.972528	0.76963	1.00957	1.23701	1.4353	1.59572	1.79587	2.31385	3.37403	4.99114	5.71301	8.26903	10.7135	9.30271
2020	Rest of Europe	Buses + Trucks	Mt	1.01134	0.784657	1.02928	1.26116	1.32405	0.621971	1.38991	2.97138	3.63356	5.73519	6.81974	8.63647	9.33728	10.0447
1970	Rest of world	Buses + Trucks	Mt	0	0	0	0	0	0	0.00110856	0.00494765	0.289338	1.29528	1.70519	1.96831	2.09779	2.14748
1980	Rest of world	Buses + Trucks	Mt	0	0	0	0.0717036	0.159459	0.17728	0.242518	0.431353	0.810336	0.69131	0.981916	2.95851	3.46366	5.03408
1990	Rest of world	Buses + Trucks	Mt	0.0591848	0.045919	0.0602346	0.0738326	0.086168	0.0994513	0.0650028	0.237463	0.514036	1.23066	2.31697	3.33102	3.86828	4.50687
2000	Rest of world	Buses + Trucks	Mt	0.0603479	0.0158126	0.0796403	0.127695	0.194156	0.326479	0.548922	0.752024	1.29241	1.96794	2.58066	3.02172	3.42192	3.4445
2010	Rest of world	Buses + Trucks	Mt	0.172382	0.222383	0.271871	0.335054	0.39574	0.46652	0.581715	0.892061	1.45463	2.2862	3.36921	3.62931	4.1169	4.09987
2020	Rest of world	Buses + Trucks	Mt	0.217454	0.174228	0.226947	0.251499	0.38638	0.433126	0.444945	0.868657	1.48322	2.49819	2.4115	3.48955	3.77598	3.39367

## Sheet: FigS2
Region	Mark	Unit	2000	2001	2002	2003	2004	2005	2006	2007	2008	2009	2010	2011	2012	2013	2014	2015	2016	2017	2018	2019	2020
United States	WRS	million	225.821	235.331	234.624	236.76	243.011	247.421	250.845	254.403	255.918	254.213	250.273	253.108	253.639	255.877	260.351	263.61	268.799	272.481	273.602	276.491
United States	OICA	million						237.697	244.643	248.701	249.813	248.972	248.232	248.932	251.497	252.715	258.027	264.194
United States	Transportation Energy Data Book	number	223.724	233.178	232.348	234.853	241	245.334	248.675	253.493	255.139	252.161	250.667	247.485	248.782	251.594	256.198	259.362	264.079	267.961	269.585	274.118
China(CHN)	WRS	million	53.4185	60.8997	71.1743	82.8815	93.4597	106.667	117.532	129.718	140.109	157.942	177.78	196.21	210.49	220.936	237.165	250.34	252.763	282.116	299.186	320.227
China(CHN)	OICA	million						31.597	36.974	43.584	50.996	62.806	78.018	93.563	109.22	126.701	145.981	162.845
China(CHN)	NBS	number	53.4183	60.8995	71.1741	82.8814	93.4597	106.667	117.532	129.718	139.188	155.99	176.392	191.767	207.777	221.671	236.852	250.505	266.971	290.272	310.001	327.638	344.697
India	WRS	million	43.538	49.196	52.803	60.331	65.89	74.042	81.697	88.2871	96.2442	105.34	116.718	129.747	146.262	167.808	176.016	194.224	211.49	234.899
India	OICA	million						10.332	11.52	13.086	14.56	16.177	17.95	20.113	22.622	24.826	26.51	28.86
India	Statistical Year Book India	million	50.9731	54.6816	62.4452	68.0566	76.0134	83.7996	90.6927	98.9472	109.057	120.946	133.415	150.185	172.137	180.211	181.367	200.059	217.703	241.885
EU-28	WRS	million	243.006	258.596	256.44	223.778	223.153	272.378	284.048	285.345	290.424	296.626	306.291	305.015	309.536	315.801	326.493	332.136	339.02	345.472	352.278	358.673
EU-28	OICA	million						262.593	267.796	268.036	273.453	275.246	278.415	281.749	283.919	286.441	289.075	294.213
EU-28	ACEA/European Commission	million	253.123	259.751	265.634	270	274.798	281.25	286.948	294.092	299.964	304.384	309.446	310.234	312.097	317.697	321.089	324.753	330.815	336.916	343.46	349.68
World	WRS	million	895.974	891.839	928.112	946.286	1008.02	1112.52	1186.72	1295.37	1314.01	1353.85	1410.17	1496.18	1562.45	1618.09	1780.9	1844.07	1935.27	1982.47
World	OICA	million						892.028	926.642	960.228	992.375	1019.86	1055.7	1097.02	1141.64	1184.93	1234.89	1282.27

## Sheet: FigS5
Fuel type	Unit	Mark	1970	1971	1972	1973	1974	1975	1976	1977	1978	1979	1980	1981	1982	1983	1984	1985	1986	1987	1988	1989	1990	1991	1992	1993	1994	1995	1996	1997	1998	1999	2000	2001	2002	2003	2004	2005	2006	2007	2008	2009	2010	2011	2012	2013	2014	2015	2016
Diesel	Mt	Model	128.281	135.224	146.453	159.476	167.242	169.144	176.341	184.088	190.901	197.794	203.705	210.58	221.334	226.567	232.482	244.941	249.175	261.281	272.688	282.128	300.996	308.383	322.496	337.85	360.437	377.988	399.436	418.906	441.351	469.726	498.174	481.147	501.072	528.712	549.758	588.668	606.029	631.338	644.646	657.538	715.73	714.704	724.184	738.586	766.629	783.807	793.592
Diesel	Mt	Statistics	117.47	126.486	136.683	149.685	152.886	157.966	173.308	187.41	204.385	218.437	222.044	229.545	229.472	246.095	259.234	272.197	287.067	303.722	328.476	345.756	371.89	382.224	394.686	411.588	425.209	442.58	467.604	483.389	497.78	522.734	543.21	556.746	578.441	606.682	644.908	665.457	688.557	722.728	733.673	721.98	755.072	780.008	796.925	815.709	822.944	845.999	846.647
Gasoline	Mt	Model	335.252	359.288	393.47	453.417	465.653	479.946	501.575	524.252	542.701	549.143	557.455	559.471	567.083	570.127	583.683	596.848	611.72	635.205	639.224	653.814	667.781	684.635	699.244	710.772	725.859	742.556	762.148	785.317	805.656	826.022	838.326	839.088	856.322	869.132	882.327	886.275	887.108	912.043	889.318	874.581	882.454	890.764	907.14	920.388	948.617	969.679	973.057
Gasoline	Mt	Statistics	442.208	465.39	497.495	527.301	522.845	545.142	571.568	589.111	614.587	608.412	596.029	595.296	595.556	596.99	599.222	601.226	620.001	640.805	663.675	677.637	697.387	704.778	717.528	724.929	736.163	754.407	773.788	787.722	803.279	814.534	814.848	822.999	841.307	845.935	864.807	867.548	874.967	882.402	876.555	876.126	904.74	897.035	910.458	938.467	949.214	981.59	1006.08
NG	10^9m3	Model	1.76663	1.91882	2.21481	2.36088	2.44578	2.44426	2.45071	2.48195	2.49907	2.50924	2.52589	2.56572	2.60914	2.65006	2.70268	2.75966	2.92534	3.70282	4.0822	4.45806	1.30674	1.04548	1.49108	1.32319	1.55251	1.30104	1.38315	1.49431	1.6892	1.80156	2.27741	3.00934	3.80398	5.35667	6.02919	7.60279	9.02279	10.3305	14.6439	17.7751	20.1329	23.3405	24.6433	26.1056	28.9898	30.6919	31.5703
NG	10^9m3	Statistics	0.745535	0.868445	1.00455	1.02256	1.19974	1.29307	1.46686	1.46637	1.52214	1.52865	1.54725	1.67398	1.81345	1.97274	2.4999	3.51772	3.72891	4.71996	5.20356	5.68265	1.6657	1.33266	1.90067	1.68666	1.97897	1.65843	1.76309	1.90479	2.15321	2.29644	2.903	3.83599	4.84891	6.82811	7.68537	9.69122	11.5013	13.1683	18.6664	22.6578	25.6633	29.7519	31.4127	33.2767	36.9532	39.1228	40.2425
[truncated: 4 more columns]

## Sheet: FigS6
Country code	Region	Unit	1970	1980	1990	2000	2010	2020		Region	Unit	1970	1971	1972	1973	1974	1975	1976	1977	1978	1979	1980	1981	1982	1983	1984	1985	1986	1987	1988	1989	1990	1991	1992	1993	1994	1995	1996	1997	1998	1999	2000	2001	2002	2003	2004	2005	2006	2007
ABW	Latin Am. + Canada	million	0	0	0.027386	0.0524008	0.0497724	0.0599324		United States	%	36.1054	34.2849	32.545	31.0885	30.4531	31.1063	31.0447	31.091	31.2283	31.3601	31.4587	31.0267	30.5455	30.1069	29.7028	29.3373	29.0123	28.7102	28.4374	28.1677	27.8934	27.2275	26.8254	26.559	26.2595	25.798	25.4091	24.7341	24.0934	23.5145	22.9061	22.7804	21.7472	21.0985	20.7764	20.0287	19.405	18.7284
AFG	Rest of Asia	million	0.0631985	0.0249481	0.165193	0.0529629	0.691573	1.1728		EU-28	%	26.5689	25.9912	25.9719	26.9796	26.6853	25.9608	26.2567	26.5123	26.6892	26.6797	26.5688	26.9449	27.2453	27.5337	27.8103	28.0925	28.3723	28.6307	28.8701	29.0492	29.1583	29.3786	29.4497	29.2438	28.9001	28.5994	28.1909	27.3442	26.9487	26.5156	25.9323	25.3925	24.8785	24.2717	23.7077	22.9783	22.4389	21.7736
AGO	Middle East + Africa	million	0.0174153	0.0333825	0.0478834	0.0685473	0.073368	0.116276		China	%	3.73643	3.51377	3.26351	3.04766	3.00842	3.05644	3.04865	3.04888	3.06794	3.09674	3.12637	3.13582	3.13492	3.13977	3.17019	3.25945	3.32372	3.40891	3.51099	3.60162	3.68949	3.83741	4.07664	4.42926	4.77939	5.10899	5.29939	5.78038	6.23967	6.79928	7.26874	7.71081	8.39111	9.15964	9.76217	10.3798	10.8058	11.1628
AIA	Latin Am. + Canada	million	0	0	0	0	0	0		India	%	3.21622	2.97944	2.67474	2.50735	2.43699	2.61316	2.61614	2.63578	2.67838	2.72897	2.78667	2.8237	2.86197	2.90918	2.96373	3.02883	3.10532	3.1933	3.29458	3.40659	3.52753	3.68212	3.82615	3.97385	4.12746	4.29211	4.4584	4.67524	4.86289	5.03629	5.21889	5.34214	5.84472	6.11401	6.55303	6.84126	7.07709	7.31036
ALB	Rest of Europe	million	0.0550772	0.0604321	0.0388033	0.0951732	0.292507	0.470409		Latin Am. + Canada	%	5.02312	4.76188	4.47192	4.37064	4.4739	4.35648	4.35062	4.36001	4.39276	4.42352	4.43963	4.43926	4.4271	4.41626	4.42524	4.45796	4.51082	4.58179	4.66493	4.7593	4.87307	5.06862	5.29233	5.56808	5.90323	6.27851	6.70593	7.28125	7.88138	8.4988	9.18703	9.29988	9.36699	9.23495	9.39738	9.54113	9.85985	10.1205
ARE	Middle East + Africa	million	0	0	0	0	0	0		Middle East + Africa	%	8.27524	11.0599	11.2855	11.1522	11.5591	10.7603	10.2352	9.31189	8.15483	7.08908	6.22578	5.71554	5.37735	5.0679	4.86003	4.70445	4.59688	4.52606	4.49242	4.48147	4.49188	4.54453	4.56946	4.59261	4.63243	4.68225	4.73303	4.86294	4.96104	5.03465	5.13281	5.19007	5.3131	5.38207	5.56431	5.58947	5.77235	5.97636
ARG	Latin Am. + Canada	million	0.0294853	0.153789	0.0856999	1.64625	7.66195	9.3313		Rest of Asia	%	4.54809	5.38685	8.36622	9.90721	10.3122	10.8033	10.9511	11.3452	11.8493	12.4345	13.0045	13.4201	13.8924	14.3519	14.7118	14.9557	15.1819	15.3954	15.5928	15.8879	16.2687	16.6974	16.993	17.2329	17.489	17.7412	18.0485	18.3383	18.1873	17.8969	17.7098	17.8249	18.1272	18.535	18.144	18.6805	18.7676	19.0678
ARM	Rest of Europe	million	0.213078	0.265653	0.297601	0.265052	0.28726	0.32046		Rest of Europe	%	12.3079	11.7962	11.1791	10.6602	10.7427	11.1121	11.2578	11.4453	11.6778	11.9168	12.1132	12.2036	12.2095	12.1498	12.0072	11.7837	11.4766	11.0868	10.6149	10.0598	9.43604	8.81064	8.11235	7.4313	6.82126	6.29234	5.83816	5.55801	5.31821	5.14138	5.04781	4.88491	4.77832	4.69761	4.60461	4.50419	4.44022	4.45822
ASM	Rest of world	million	0.00154809	0.00387826	0.00441934	0.00684708	0.00797062	0.00716203		Rest of world	%	0.218798	0.225843	0.242028	0.286693	0.328253	0.231196	0.238974	0.249633	0.261468	0.270615	0.276358	0.29033	0.305965	0.324514	0.348773	0.380111	0.420202	0.466838	0.521946	0.586384	0.661585	0.753137	0.855045	0.969263	1.08762	1.20716	1.3165	1.42554	1.50745	1.56255	1.59655	1.5744	1.55289	1.50645	1.4904	1.45662	1.43312	1.40195
ATG	Latin Am. + Canada	million	6.79645e-07	1.36086e-05	7.31942e-05	0.00111097	0.0148638	0.03283
AUS	Rest of world	million	1.65226e-10	0.00634321	1.54083	9.85678	12.4898	15.0879
AUT	EU-28	million	0.152551	1.53756	3.18362	4.3418	4.44103	5.03123
AZE	Rest of Europe	million	0.347517	0.481443	0.41454	0.356793	0.80957	1.13338
BDI	Middle East + Africa	million	0.00155057	0.0016158	0.0021302	0.00433297	0.0264248	0.0369057
BEL	EU-28	million	2.14444	3.29332	4.07603	5.08188	5.27835	5.80877
BEN	Middle East + Africa	million	0.0482962	0.063484	0.088336	0.13154	0.0621936	0.010519
BFA	Middle East + Africa	million	0.000960691	0.00434616	0.0118282	0.048869	0.120209	0.296936
BGD	Rest of Asia	million	0.0140016	0.0126741	0.0245205	0.0603124	0.26421	0.673939
BGR	EU-28	million	0.288196	0.971302	1.33695	2.07412	2.53554	2.69672
BHR	Middle East + Africa	million	0.0595173	0.0784984	0.106704	0.169686	0.37451	0.531431
BHS	Latin Am. + Canada	million	0.029127	0.0342619	0.0471413	0.0585237	0.0659757	0.072028
BIH	Rest of Europe	million	0.000167561	0.000277178	0.00122425	0.189156	0.724787	0.922389
BLR	Rest of Europe	million	0.554569	0.957694	1.29286	1.71736	2.90323	3.52078
BLZ	Latin Am. + Canada	million	2.36139e-05	0.000735695	0.00719813	0.0320926	0.0524927	0.063816
BMU	Latin Am. + Canada	million	3.3841e-138	0.0129358	0.0169209	0.0222296	0.023183	0.0246543
BOL	Latin Am. + Canada	million	0.011196	0.0791168	0.0223199	0.173915	0.205961	0.894901
BRA	Latin Am. + Canada	million	2.58252e-07	0.757836	5.18584	25.5043	37.1883	61.7372
BRB	Latin Am. + Canada	million	0	9.54641e-81	2.03566e-09	0.0337442	0.0677744	1.80718e-14
BRN	Rest of Asia	million	3.12488e-146	0	0.00143777	0.118808	0.0981955	0.269414
BTN	Rest of Asia	million	4.58567e-07	5.77856e-06	0.000175103	0.00522554	0.0340107	0.07424
BWA	Middle East + Africa	million	1.39738e-08	2.62752e-05	0.00430191	0.0452176	0.177131	0.35704
Bonaire, Sint Eustatius and Saba	Rest of world	million	0	0	0	0	0	0
CAF	Middle East + Africa	million	0.00124638	0.00148063	0.00170913	0.00282346	0.00671658	0.0171956
CAN	Latin Am. + Canada	million	8.25773	11.1015	13.6849	16.8322	20.268	23.0299
CHE	Rest of Europe	million	1.79601	2.4192	3.05284	3.58475	4.07246	4.64046
CHL	Latin Am. + Canada	million	0.0664191	0.0929311	0.367859	1.52703	2.17195	3.65982
CHN	China	million	0.043289	0.2325	1.2165	7.1148	58.6162	243.909
CIV	Middle East + Africa	million	3.27233e-51	4.02484e-93	0.0107356	0.215588	0.253551	2.26116e-08
CMR	Middle East + Africa	million	0.0408048	0.0266252	0.0652727	0.112449	0.047576	0.0381671
COD	Middle East + Africa	million	0.121039	0.136545	0.11129	0.0741994	0.10688	0.173524
COG	Middle East + Africa	million	0.0131107	0.0115894	0.0103891	0.0135618	0.0235411	0.0347941
COL	Latin Am. + Canada	million	0.236119	0.611991	1.12289	1.78714	2.86664	4.21428
COM	Middle East + Africa	million	0	0.00648589	0.00815886	0.000606786	0.0289256	0.0397676
CPV	Middle East + Africa	million	0.00166147	0.00254155	0.00457895	0.0137918	0.0307002	0.0369558
CRI	Latin Am. + Canada	million	0.10809	0.199133	0.292995	0.473284	0.641307	0.931203
CUB	Latin Am. + Canada	million	0.0522731	0.115301	0.140405	0.14106	0.266329	0.270833
CUW	Latin Am. + Canada	million	6.66441e-06	3.36547e-05	0.000144403	0.0010176	0.00192983	0.00341714
CYM	Latin Am. + Canada	million	0.00332145	0.00613096	0.0100481	0.0175522	0.026593	0.0258508
CYP	EU-28	million	0.0169918	0.0832649	0.188611	0.280916	0.462652	0.556548
CZE	EU-28	million	0.937857	1.85228	2.43795	3.27038	4.46315	5.66951
Cook Islands	Rest of world	million	0	0	0	0	0	0
DEU	EU-28	million	15.7671	26.7884	37.521	40.2267	42.3128	47.2735
DJI	Middle East + Africa	million	0.00759251	0.00930945	0.00870439	0.0128349	0.0222419	0.0325031
DMA	Latin Am. + Canada	million	2.40341e-06	0.000174529	0.013156	0.0206664	0.0248884	0.0232667
DNK	EU-28	million	0.909513	1.19881	1.42076	1.75584	2.16363	2.56732
DOM	Latin Am. + Canada	million	0.126951	0.238576	0.347463	0.60415	0.662633	0.713053
DZA	Middle East + Africa	million	0.250885	1.04448	1.24756	1.81628	2.69107	4.2627
ECU	Latin Am. + Canada	million	1.15518e-08	0.122114	0.253004	0.417725	0.608933	1.28836
EGY	Middle East + Africa	million	2.52276e-36	3.22828e-11	0.00329668	0.793403	3.11248	5.68419
ERI	Middle East + Africa	million	0.000522082	0.00398723	0.0124009	0.0297148	0.0360768	0.0435634
ESH	Rest of world	million	0	0	0	0	0	0
ESP	EU-28	million	2.36495	7.3542	11.7037	17.1363	22.1724	22.9769
EST	EU-28	million	0.0537913	0.14258	0.271988	0.500866	0.5534	0.801571
ETH	Middle East + Africa	million	0.0502686	0.0555022	0.0636136	0.09365	0.14732	0.226166
FIN	EU-28	million	0.78781	1.33259	2.13746	2.34163	2.93965	3.55058
FJI	Rest of world	million	0.0249037	0.0389568	0.0470982	0.0648446	0.099778	0.0605904
FRA	EU-28	million	13.0841	21.1729	29.3127	29.7274	32.9612	31.7902
FRO	Rest of Europe	million	8.43215e-08	4.91628e-06	4.32344e-05	0.00773531	0.0229644	0.0257461
FSM	Rest of world	million	0.00100369	0.00132433	0.00184141	0.0019704	0.0043338	0.00708911
Falkland Islands	Rest of world	million	0	0	0	0	0	0
GAB	Middle East + Africa	million	0.00775723	0.016379	0.0239349	0.0290574	0.0349668	0.045371
GBR	EU-28	million	0	0	0	0	0	0
GEO	Rest of Europe	million	0.496693	1.32912	0.90064	0.272406	0.622405	1.13009
GHA	Middle East + Africa	million	0.121397	0.0366721	0.0350202	0.165787	0.457816	1.30765
GIB	Rest of Europe	million	0.00564045	0.00694574	0.00787911	0.0101837	0.0134803	0.0154909
GIN	Middle East + Africa	million	0.00417573	0.0201337	0.0289862	0.0732374	0.101378	0.239051
GLP	Rest of world	million	0	0	0	0	0	0
GMB	Middle East + Africa	million	0.000810498	0.00434634	0.00513602	0.00728234	0.00440847	0.00993591
GNB	Middle East + Africa	million	0.00295601	0.00347364	0.00451885	0.00540167	0.0527906	0.0670772
GNQ	Middle East + Africa	million	5.70803e-06	5.91308e-06	1.38323e-05	4.66576e-05	0.000106881	0.000102996
GRC	EU-28	million	0.139367	0.746292	1.73584	3.21906	5.3259	5.58051
GRD	Latin Am. + Canada	million	2.87197e-59	6.60861e-27	4.82829e-14	2.6464e-07	0.000129733	0.037939
GRL	Rest of Europe	million	0.000191268	0.000435383	0.000548711	0.000765923	0.00139606	0.00244661
GTM	Latin Am. + Canada	million	5.0936e-12	0.00708852	0.0035262	0.182143	0.552059	0.893876
GUF	Rest of world	million	0	0	0	0	0	0
GUM	Rest of Asia	million	0	0	0	1.19019e-12	0.071315	0.0858065
GUY	Latin Am. + Canada	million	0.00914717	0.00806253	0.00654248	0.0226411	0.047873	0.19837
HKG	China	million	4.48598e-16	2.01983e-06	0.0608524	0.341327	0.433097	0.573469
HND	Latin Am. + Canada	million	0.0779229	0.148821	0.210336	0.326064	0.564579	0.430129
HRV	EU-28	million	0.117224	0.357555	0.617316	1.20774	1.56139	1.59265
HTI	Latin Am. + Canada	million	0.0100293	0.0242765	0.027267	0.107254	0.0555458	0.0623586
HUN	EU-28	million	0.502825	1.13284	2.11908	2.5379	2.9928	3.64857
IDN	Rest of Asia	million	0.202654	0.605514	1.27034	3.0004	8.62842	16.5609
IND	India	million	0.447433	0.778184	2.08384	7.09714	19.1594	39.6918
IRL	EU-28	million	0.324808	0.650897	0.762211	1.30245	1.90774	2.19576
IRN	Middle East + Africa	million	2.97537	3.03875	1.10559	2.49397	6.00289	7.28311
IRQ	Middle East + Africa	million	6.91388e-09	0.0030027	0.00935404	0.668009	3.1763	5.65167
ISL	Rest of Europe	million	0.00600878	0.0706436	0.129334	0.165048	0.204736	0.255554
ISR	Middle East + Africa	million	2.96747e-05	0.00493617	0.318897	1.44991	2.07723	2.87865
ITA	EU-28	million	12.8427	16.9551	26.3267	31.7055	36.448	37.349
Isle of Man (under British governance)	Rest of world	million	0	0	0	0	0	0
JAM	Latin Am. + Canada	million	0.198061	0.178596	0.226953	0.296504	0.419352	0.695838
JOR	Middle East + Africa	million	0.00852297	0.0973067	0.140059	0.222756	0.739686	1.14633
JPN	Rest of Asia	million	2.62034	26.4905	41.0888	57.7653	62.4442	65.4963
Jersey	Rest of world	million	0	0	0	0	0	0
KAZ	Rest of Asia	million	0.337609	0.599317	0.658714	0.759367	2.19534	2.28658
KEN	Middle East + Africa	million	0.00415473	0.135975	0.207863	0.248103	0.553397	1.11313
KGZ	Rest of Asia	million	0.0297772	0.050352	0.0568234	0.0386841	0.0412371	0.0608231
KHM	Rest of Asia	million	0.125444	0.114972	0.149416	0.191197	0.183223	0.0675287
KIR	Rest of Asia	million	0	0	0.00246129	0.0072499	0.0142168	0.000127264
KNA	Latin Am. + Canada	million	0.000887695	0.00274501	0.00767135	0.012929	0.016386	0.0193028
KOR	Rest of Asia	million	0.00671182	0.0907174	1.64754	7.99679	13.5952	19.3028
KWT	Middle East + Africa	million	0.0691241	0.352527	0.589415	0.720223	1.0243	1.58133
LAO	Rest of Asia	million	0.000838962	0.00103787	0.0016583	0.00647816	0.02404	0.086863
LBN	Middle East + Africa	million	0.215176	0.333912	0.469482	0.85244	1.34287	1.38716
LBR	Middle East + Africa	million	4.29038e-102	1.09562e-27	0.0262938	0.0287934	0.0376282	0.0494598
LBY	Middle East + Africa	million	0.146492	0.0457239	0.0912727	0.648202	0.82081	0.273062
LCA	Latin Am. + Canada	million	0.0297712	0.0343622	0.0391762	0.0411828	0.036633	0.0530069
LIE	Rest of Europe	million	0.00879259	0.010839	0.0122812	0.01524	0.0189035	0.0214397
LKA	Rest of Asia	million	0.012226	0.0317118	0.0898057	0.265329	0.410282	0.849086
LSO	Middle East + Africa	million	0.00153279	0.00543798	0.00967271	0.0224468	0.0655196	0.0799779
LTU	EU-28	million	0.0814032	0.274994	0.539671	1.23658	1.74354	1.17403
LUX	EU-28	million	0.0702282	0.125708	0.179929	0.272179	0.335284	0.425436
LVA	EU-28	million	0.143422	0.355399	0.414154	0.623661	0.647981	0.688321
MAC	China	million	0.0198054	0.0223325	0.0358091	0.0495258	0.08069	0.109091
MAR	Middle East + Africa	million	0.377622	0.62942	0.998737	1.47761	2.09616	3.27225
MDA	Rest of Europe	million	0.372321	0.605271	0.563762	0.222531	0.505932	0.723413
MDG	Middle East + Africa	million	0.0111903	0.0318411	0.051714	0.0747962	0.132663	1.42416e-107
MDV	Rest of Asia	million	5.3526e-13	1.07815e-08	2.72921e-05	0.0011308	0.00303	0.0220963
MEX	Latin Am. + Canada	million	4.15724e-44	0.00215527	0.249025	8.87455	21.1528	33.0142
MHL	Rest of world	million	5.97247e-05	0.000103099	0.000181002	0.000235313	0.000255019	0.000377069
MKD	Rest of Europe	million	0.243467	0.285402	0.303165	0.312149	0.309154	0.410182
MLI	Middle East + Africa	million	2.03922e-146	1.20975e-37	4.54403e-12	0.00634111	0.122915	0.2106
MLT	EU-28	million	0.0251406	0.0702471	0.131656	0.204404	0.241066	0.304394
MMR	Rest of Asia	million	0.0299592	0.0486765	0.064959	0.178775	0.259712	0.655443
MNE	Rest of Europe	million	0.0299215	0.0942415	0.108619	0.0963206	0.174076	0.250859
MNG	Rest of Asia	million	0.0143724	0.0297746	0.0462958	0.0612135	0.172145	0.428551
MOZ	Middle East + Africa	million	1.19851e-12	4.67142e-12	9.64211e-11	0.000688629	0.233083	0.42749
MRT	Middle East + Africa	million	0.0128684	0.0155429	0.0232343	0.0326931	0.0413809	0.0551823
MSR	Rest of world	million	0	0	0	0	0	0
MTQ	Rest of world	million	0	0	0	0	0	0
MUS	Middle East + Africa	million	0.00370491	0.0107848	0.0317202	0.0887972	0.175634	0.292242
MWI	Middle East + Africa	million	0.0391106	0.0522304	0.0790027	0.0928267	0.0246808	0.00029424
MYS	Rest of Asia	million	0.15594	0.533963	1.6676	4.63005	0.585304	0.499412
MYT	Rest of world	million	0	0	0	0	0	0
NAM	Middle East + Africa	million	0.066215	0.0730302	0.0820053	0.12649	0.108467	0.196178
NCL	Rest of world	million	0.0373235	0.0513496	0.0677494	0.0762453	0.094017	0.110354
NER	Middle East + Africa	million	0.0582061	0.0856017	0.0889734	0.0396113	0.103909	0.236695
NGA	Middle East + Africa	million	0.50105	0.780403	0.307402	0.905424	1.81951	2.185
NIC	Latin Am. + Canada	million	0.0397175	0.0571623	0.0442022	0.0604155	0.126532	0.175122
NIU	Rest of world	million	0	0	0	0	0	0
NLD	EU-28	million	2.35372	4.23434	5.287	6.45577	7.66112	8.53508
NOR	Rest of Europe	million	5.21883e-06	0.16705	1.60679	1.83059	2.3008	2.77139
NPL	Rest of Asia	million	0.00278624	0.00450196	0.0143851	0.0429762	0.107431	0.197053
NZL	Rest of world	million	0.378188	0.894396	1.48586	2.5258	2.87475	3.62927
Nauru	Rest of world	million	0	0	0	0	0	0
Norfolk Island (under Australian governance)	Rest of world	million	0	0	0	0	0	0
Northern Mariana Islands	Rest of world	million	0	0	0	0	0	0
OMN	Middle East + Africa	million	0.003013	0.032281	0.164265	0.347358	0.532355	0.424669
PAK	Rest of Asia	million	3.62487e-06	0.00204708	0.230768	1.15799	1.84146	3.70462
PAN	Latin Am. + Canada	million	0.0899061	0.139928	0.185163	0.272085	0.339605	0.689261
PER	Latin Am. + Canada	million	0.379704	0.526255	0.568512	0.750838	1.09527	2.18424
PHL	Rest of Asia	million	0.228026	0.381834	0.476719	0.668832	0.808583	1.82029
PLW	Rest of world	million	0	0	0	0	0	0
PNG	Rest of world	million	0.00896289	0.0115699	0.0161727	0.0231674	0.0416201	0.0684362
POL	EU-28	million	0.144932	1.16218	4.29243	10.0049	17.2398	24.1911
PRI	Latin Am. + Canada	million	0.000548468	0.0141418	0.131861	1.2143	2.44396	4.17089
PRK	Rest of Asia	million	0.0544752	0.076486	0.107901	0.159165	0.191504	0.142715
PRT	EU-28	million	0.211033	0.949691	1.70163	3.54581	4.76362	5.25914
PRY	Latin Am. + Canada	million	0.000815568	0.0922556	0.192363	0.259919	0.295147	0.371289
PSE	Rest of Asia	million	0.0321183	0.0472431	0.0689254	0.101776	0.125234	0.225095
PYF	Rest of world	million	0	0	0	0	0	0
Pitcairn	Rest of world	million	0	0	0	0	0	0
QAT	Middle East + Africa	million	0.00460229	0.0758275	0.194394	0.163348	0.512071	1.60617
REU	Rest of world	million	0	0	0	0	0	0
ROU	EU-28	million	0.21384	0.435269	1.11825	2.70318	4.2699	6.59499
RUS	Rest of Europe	million	13.4805	26.2144	27.1434	19.3601	31.9748	42.4912
RWA	Middle East + Africa	million	0.0040724	0.0099094	0.00696556	0.0118823	0.028769	0.067055
SAU	Middle East + Africa	million	1.1907	2.54021	2.59101	3.41874	4.23949	5.06323
SDN	Middle East + Africa	million	0.380819	0.53426	0.745972	0.957812	0.908692	1.04309
SEN	Middle East + Africa	million	0.0667501	0.0680459	0.0186088	0.093897	0.211652	0.490727
SGP	Rest of Asia	million	0.0371282	0.163622	0.272418	0.379515	0.621258	0.649471
SHN	Middle East + Africa	million	7.61009e-05	0.000107982	0.000120364	0.000103709	0.00126525	0.0015746
SLB	Rest of world	million	0.000130723	0.000326857	0.00057968	0.00070281	0.000920344	0.00123422
SLE	Middle East + Africa	million	0.00504617	0.0062035	0.00397815	0.00269695	0.0296006	0.0482351
SLV	Latin Am. + Canada	million	0.094825	0.095279	0.043879	0.173909	0.305856	0.674239
SOM	Middle East + Africa	million	0.00581064	0.00913092	0.0140942	0.0398412	0.0785541	0.0946658
SPM	Rest of world	million	0	0	0	0	0	0
SRB	Rest of Europe	million	0.851143	1.14992	1.34564	1.16599	1.50991	2.14495
SSD	Middle East + Africa	million	0	0	0	0	0	0
STP	Middle East + Africa	million	9.1923e-05	9.9979e-05	0.000115923	0.000145243	0.000929406	0.0159228
SUR	Latin Am. + Canada	million	0.0298295	0.0794822	0.060996	0.0734734	0.11927	0.168376
SVK	EU-28	million	0.220101	0.502683	0.824475	1.21283	1.67184	2.31486
SVN	EU-28	million	0.157711	0.429992	0.592735	0.866469	1.05034	1.11071
SWE	EU-28	million	2.2965	2.88522	3.66526	4.02559	4.34728	4.88695
SWZ	Middle East + Africa	million	0.000366394	0.00711104	0.0226202	0.0323626	0.0270813	0.0227675
SYC	Middle East + Africa	million	3.29753e-05	0.000106781	0.000460708	0.00142616	0.00359044	0.00547967
SYR	Middle East + Africa	million	0.00196784	0.00632814	0.0322598	0.24111	1.0832	2.96945
Sint Maarten	Rest of world	million	0	0	0	0	0	0
TCA	Rest of world	million	0	0	0	0	0	0
TCD	Middle East + Africa	million	0.00371747	0.00351573	0.0047163	0.00787225	0.237433	0.219629
TGO	Middle East + Africa	million	0.011569	0.0158888	0.0181818	0.022823	0.00901183	0.0189603
THA	Rest of Asia	million	0.0867749	0.246923	0.777	2.111	4.497	10.4465
TJK	Rest of Asia	million	0.162666	0.21305	0.245008	0.151122	0.305257	0.499723
TKM	Rest of Asia	million	0.0816969	0.0957159	0.134795	0.142142	0.621451	1.87006
TLS	Rest of Asia	million	0.00208648	0.00276594	0.00359571	0.00430087	0.0055813	0.00490986
TON	Rest of world	million	0.000518531	0.00163477	0.00356527	0.0183984	0.0253585	0.0385219
TTO	Latin Am. + Canada	million	0.00954796	0.0259349	0.0216895	0.0814385	0.288592	0.290202
TUN	Middle East + Africa	million	0.0793688	0.218568	0.374267	0.699745	0.881375	1.3595
TUR	Middle East + Africa	million	0.452366	0.889799	1.7076	3.89108	7.34429	12.387
TUV	Rest of world	million	1.59241e-05	1.18999e-05	2.47773e-05	5.11659e-05	6.49682e-05	0.000126845
TWN	China	million	2.54143	3.22227	3.95873	4.74276	5.80341	6.9771
TZA	Middle East + Africa	million	0.00159565	0.00209575	0.00292705	0.0255481	0.330942	0.839055
Tokelau	Rest of world	million	0	0	0	0	0	0
UGA	Middle East + Africa	million	0.0203447	0.0260343	0.0382552	0.0584418	0.0970574	0.125157
UKR	Rest of Europe	million	6.29737	10.3574	10.6065	5.18425	6.75674	8.35001
URY	Latin Am. + Canada	million	0	0	0	0	0	0
USA	United States	million	0	0	0	0	0	0
UZB	Rest of Asia	million	0	0	0	0	0	0
VCT	Latin Am. + Canada	million	6.6963e-07	1.86178e-05	0.000879076	0.00715756	0.017254	0.021803
VEN	Latin Am. + Canada	million	0	0	0	0	0	0
VGB	Latin Am. + Canada	million	4.72607e-06	0.00151265	0.000136451	0.00918153	0.010062	0.000860663
VIR	Rest of world	million	0	0	0	0	0	0
VNM	Rest of Asia	million	0	0	0	0	0	0
VUT	Rest of world	million	0	0	0	0	0	0
WLF	Rest of world	million	0	0	0	0	0	0
WSM	Rest of world	million	0.000150597	5.16405e-05	2.72751e-05	0.0013752	0.008414	0.0203262
YEM	Middle East + Africa	million	0	0	0	0	0	0
ZAF	Middle East + Africa	million	1.96551	2.80579	2.98463	3.81196	5.59634	7.33798
ZMB	Middle East + Africa	million	0	0	0	0	0	0
ZWE	Middle East + Africa	million	0	0	0	0	0	0
[truncated: 13 more columns]

[truncated: 4 more sheets: FigS8, FigS9, FigS10, FigS12]
